# Supplementary material for: The Penn Medicine BioBank: Towards a Genomics-Enabled Learning Healthcare System to Accelerate Precision Medicine in a Diverse Population
Source: J Pers Med. 2022 Nov 29;12(12):1974. doi: 10.3390/jpm12121974 (PMC9785650; doi:10.3390/jpm12121974)
Supplement: Supplementary file 1 [file jpm-12-01974-s001.zip › Supplemental_Tables.xlsx]

## Sheet: Table S1
Supplementary Table S1. PheWAS between mean body mass index and phecodes
PheCode	Phenotype Description	Category	Beta	Beta_SE	P	OR	Cases	Controls
1002	Symptoms concerning nutrition, metabolism, and development	symptoms	-0.0969222	0.00251463	1E-321	0.907627	6851	152119
250	Diabetes mellitus	endocrine/metabolic	0.0717658	0.00096144	1E-321	1.0744	39862	115272
250.2	Type 2 diabetes	endocrine/metabolic	0.093164	0.00112065	1E-321	1.09764	24581	136833
271	Disorders of carbohydrate transport and metabolism	endocrine/metabolic	0.0606348	0.00127708	1E-321	1.06251	12241	149145
271.3	Intestinal disaccharidase deficiencies and disaccharide malabsorption	endocrine/metabolic	0.0614552	0.00128125	1E-321	1.06338	12121	149352
272	Disorders of lipoid metabolism	endocrine/metabolic	0.0492633	0.000945834	1E-321	1.0505	64470	90327
272.1	Hyperlipidemia	endocrine/metabolic	0.0497718	0.000947028	1E-321	1.05103	64082	90692
278	Overweight, obesity and other hyperalimentation	endocrine/metabolic	0.242234	0.00150394	1E-321	1.27409	36501	112325
278.1	Obesity	endocrine/metabolic	0.318957	0.00194369	1E-321	1.37569	28964	124842
278.11	Morbid obesity	endocrine/metabolic	0.339237	0.00249254	1E-321	1.40388	14362	144936
327	Sleep disorders	neurological	0.0933676	0.00100317	1E-321	1.09787	32807	120773
327.3	Sleep apnea	neurological	0.149899	0.0012559	1E-321	1.16172	22584	137741
327.32	Obstructive sleep apnea	neurological	0.148406	0.00130225	1E-321	1.15998	19024	141465
401	Hypertension	circulatory system	0.0957084	0.00104113	1E-321	1.10044	67991	88257
401.1	Essential hypertension	circulatory system	0.0958311	0.00103968	1E-321	1.10057	67001	89135
509	Respiratory failure, insufficiency, arrest	respiratory	0.078146	0.00152124	1E-321	1.08128	8248	150135
509.8	Dependence on respirator [Ventilator] or supplemental oxygen	respiratory	0.101701	0.00173782	1E-321	1.10705	5662	155783
512	Other symptoms of respiratory system	respiratory	0.033426	0.00088374	1E-321	1.03399	48627	96702
512.9	Other dyspnea	respiratory	0.0497866	0.00111026	1E-321	1.05105	20071	132500
539	Bariatric surgery	digestive	0.038242	0.000982136	1E-321	1.03898	26365	123645
571	Chronic liver disease and cirrhosis	digestive	0.0559589	0.00140232	1E-321	1.05755	9836	151151
571.5	Other chronic nonalcoholic liver disease	digestive	0.0590569	0.00142003	1E-321	1.06084	9398	151759
740	Osteoarthrosis	musculoskeletal	0.0554999	0.00106302	1E-321	1.05707	28296	127126
740.1	Osteoarthritis; localized	musculoskeletal	0.0555652	0.00118466	1E-321	1.05714	18546	139266
740.11	Osteoarthrosis, localized, primary	musculoskeletal	0.0560021	0.00120309	1E-321	1.0576	17667	140343
740.9	Osteoarthrosis NOS	musculoskeletal	0.0555544	0.00127702	1E-321	1.05713	15661	141376
782.3	Edema	symptoms	0.0535514	0.00127301	1E-321	1.05501	13994	142463
260	Protein-calorie malnutrition	endocrine/metabolic	-0.10592	0.00284851	1.21607e-302	0.899496	5756	153612
250.4	Abnormal glucose	endocrine/metabolic	0.0422172	0.00115148	2.79379e-294	1.04312	17812	136863
256.4	Polycystic ovaries	endocrine/metabolic	0.080439	0.00220406	1.29434e-291	1.08376	2706	162662
743	Osteoporosis, osteopenia and pathological fracture	musculoskeletal	-0.0637033	0.00175359	5.96821e-289	0.938283	14018	145454
743.1	Osteoporosis	musculoskeletal	-0.0895719	0.00246598	7.01041e-289	0.914323	7957	154849
782	Symptoms involving skin and other integumentary tissue	symptoms	0.0472205	0.00131187	1.00829e-283	1.04835	12596	144821
743.11	Osteoporosis NOS	musculoskeletal	-0.0908646	0.0025256	1.88779e-283	0.913141	7643	155219
278.4	Abnormal weight gain	endocrine/metabolic	0.0614683	0.00175203	1.18306e-269	1.0634	4740	156162
495	Asthma	respiratory	0.0335165	0.00102209	7.62099e-236	1.03408	21903	138562
428.4	Heart failure with preserved EF [Diastolic heart failure]	circulatory system	0.0703764	0.00216035	8.87183e-233	1.07291	4419	158676
530.11	GERD	digestive	0.0301211	0.000924978	1.32148e-232	1.03058	35602	116574
272.13	Mixed hyperlipidemia	endocrine/metabolic	0.0347729	0.0010819	1.19055e-226	1.03538	25382	132812
274.1	Gout	endocrine/metabolic	0.0631249	0.0019698	2.47208e-225	1.06516	5939	158314
256	Ovarian dysfunction	endocrine/metabolic	0.064926	0.00203745	7.83591e-223	1.06708	3438	161423
530.1	Esophagitis, GERD and related diseases	digestive	0.0287444	0.000911153	1.95302e-218	1.02916	37888	114229
512.7	Shortness of breath	respiratory	0.03104	0.000986998	4.33985e-217	1.03153	29872	120583
274	Gout and other crystal arthropathies	endocrine/metabolic	0.0601069	0.00193208	1.76367e-212	1.06195	6255	157757
277.7	Dysmetabolic syndrome X	endocrine/metabolic	0.0889018	0.00288456	1.41714e-208	1.09297	1644	163447
530	Diseases of esophagus	digestive	0.0272891	0.000899049	2.2772e-202	1.02766	40126	111834
261	Vitamin deficiency	endocrine/metabolic	0.0314905	0.00105583	1.83523e-195	1.03199	21473	135611
250.42	Other abnormal glucose	endocrine/metabolic	0.0379752	0.00128153	5.65021e-193	1.03871	13281	142384
261.4	Vitamin D deficiency	endocrine/metabolic	0.0322254	0.0011042	3.06605e-187	1.03275	18702	139124
513.3	Hypoventilation	respiratory	0.0984517	0.00341008	2.77727e-183	1.10346	942	162951
250.24	Type 2 diabetes with neurological manifestations	endocrine/metabolic	0.066308	0.0023525	8.63223e-175	1.06856	2966	161331
456	Chronic venous insufficiency [CVI]	circulatory system	0.0724499	0.00264591	4.5171e-165	1.07514	2378	161934
260.2	severe protein-calorie malnutrition	endocrine/metabolic	-0.122969	0.00450357	3.72811e-164	0.884291	2418	160052
428	Congestive heart failure; nonhypertensive	circulatory system	0.0388749	0.00142597	1.19683e-163	1.03964	12814	148091
250.22	Type 2 diabetes with renal manifestations	endocrine/metabolic	0.0549691	0.00214026	1.79036e-145	1.05651	4228	159507
327.1	Hypersomnia	neurological	0.0588363	0.00229701	1.05717e-144	1.0606	2731	159852
450	Noninfectious disorders of lymphatic channels	circulatory system	0.0688693	0.00276644	8.52335e-137	1.0713	1926	162536
296	Mood disorders	mental disorders	0.0242631	0.000978326	8.83309e-136	1.02456	26455	129616
272.11	Hypercholesterolemia	endocrine/metabolic	0.0274563	0.00111366	3.31852e-134	1.02784	25922	131887
427.21	Atrial fibrillation	circulatory system	0.0344504	0.00139898	6.75967e-134	1.03505	16387	145181
427.2	Atrial fibrillation and flutter	circulatory system	0.0339587	0.00138009	1.08668e-133	1.03454	16960	144668
733	Other disorders of bone and cartilage	musculoskeletal	-0.0435362	0.001775	7.52322e-133	0.957398	11550	147577
401.21	Hypertensive heart disease	circulatory system	0.05406	0.0022338	2.17672e-129	1.05555	4082	157384
296.2	Depression	mental disorders	0.0243872	0.0010107	1.23669e-128	1.02469	24062	132046
338.2	Chronic pain	neurological	0.0257257	0.00109704	1.32084e-121	1.02606	20186	133678
338	Pain	neurological	0.0237014	0.00101112	1.6452e-121	1.02398	26105	120991
681	Superficial cellulitis and abscess	dermatologic	0.0370865	0.00159553	1.63898e-119	1.03778	7561	149709
745	Pain in joint	musculoskeletal	0.0203604	0.000879641	1.58628e-118	1.02057	43807	106686
513	Respiratory abnormalities	respiratory	0.0577422	0.00252497	9.58073e-116	1.05944	2549	158807
296.22	Major depressive disorder	mental disorders	0.0246239	0.001079	2.83791e-115	1.02493	20043	134980
411	Ischemic Heart Disease	circulatory system	0.0283902	0.00124467	3.69079e-115	1.0288	23768	134681
574.1	Cholelithiasis	digestive	0.0435035	0.00190763	4.08655e-115	1.04446	4875	158274
250.41	Impaired fasting glucose	endocrine/metabolic	0.042589	0.00187106	1.09241e-114	1.04351	6094	156628
411.4	Coronary atherosclerosis	circulatory system	0.029846	0.00131599	7.15593e-114	1.0303	21139	138759
771.1	Swelling of limb	symptoms	0.0343944	0.00151951	1.94829e-113	1.03499	8738	147131
574	Cholelithiasis and cholecystitis	digestive	0.0403664	0.00179513	5.62024e-112	1.04119	5802	156961
415	Pulmonary heart disease	circulatory system	0.034939	0.00155583	1.09731e-111	1.03556	8949	153219
351	Other peripheral nerve disorders	neurological	0.0344733	0.00156449	1.33573e-107	1.03507	8284	151342
250.3	Insulin pump user	endocrine/metabolic	0.0315398	0.00143372	2.97127e-107	1.03204	11103	149020
260.1	Cachexia	endocrine/metabolic	-0.403609	0.0183702	5.47721e-107	0.667905	294	164696
428.1	Congestive heart failure (CHF) NOS	circulatory system	0.0356193	0.00164255	2.81906e-104	1.03626	8947	152148
244.4	Hypothyroidism NOS	endocrine/metabolic	0.0264592	0.00122198	5.72715e-104	1.02681	17492	144145
244	Hypothyroidism	endocrine/metabolic	0.0252145	0.00117386	2.39616e-102	1.02554	19307	142292
416	Cardiomegaly	circulatory system	0.0372183	0.00173514	4.58843e-102	1.03792	7168	152020
274.11	Gouty arthropathy	endocrine/metabolic	0.0680354	0.00318625	3.67037e-101	1.0704	1825	162949
743.9	Osteopenia or other disorder of bone and cartilage	musculoskeletal	-0.0509904	0.00239525	1.46231e-100	0.950288	6460	154689
642	Hypertension complicating pregnancy, childbirth, and the puerperium	pregnancy complications	0.0445713	0.00209697	2.9604e-100	1.04558	3274	161423
182	Malignant neoplasm of uterus	neoplasms	0.0702728	0.00333214	9.95634e-99	1.0728	1334	164305
681.5	Cellulitis and abscess of leg, except foot	dermatologic	0.0613182	0.00291602	3.6349e-98	1.06324	1846	161471
729	Other disorders of soft tissues	musculoskeletal	0.034858	0.00168249	2.37728e-95	1.03547	6784	151800
443.1	Raynaud's syndrome	circulatory system	-0.0959563	0.00467692	1.51858e-93	0.908504	1992	163128
272.12	Hyperglyceridemia	endocrine/metabolic	0.051121	0.002517	1.04269e-91	1.05245	2898	161210
649	Other conditions or status of the mother complicating pregnancy, childbirth, or the puerperium	pregnancy complications	0.0332469	0.00164137	3.17267e-91	1.03381	7050	156373
401.2	Hypertensive heart and/or renal disease	circulatory system	0.0326294	0.0016148	8.5879e-91	1.03317	9626	149190
550.5	Ventral hernia	digestive	0.0494625	0.00248606	4.4112e-88	1.05071	2720	161434
278.3	Localized adiposity	endocrine/metabolic	0.0858799	0.00433386	2.1663e-87	1.08968	498	164827
286.2	Encounter for long-term (current) use of anticoagulants	hematopoietic	0.031247	0.00157974	4.44032e-87	1.03174	10370	150450
716.9	Arthropathy NOS	musculoskeletal	0.0392376	0.00199978	1.0238e-85	1.04002	5354	155303
573.3	Hepatomegaly	digestive	0.0579278	0.0029589	2.40586e-85	1.05964	1573	162422
550.6	Incisional hernia	digestive	0.0542171	0.00278653	2.54898e-84	1.05571	2110	162955
716	Other arthropathies	musculoskeletal	0.0377383	0.00194545	7.98445e-84	1.03846	5680	154617
506	Empyema and pneumothorax	respiratory	-0.0658588	0.00341203	5.17092e-83	0.936263	3595	159758
550.1	Inguinal hernia	digestive	-0.0696386	0.00362763	3.94346e-82	0.932731	3790	160253
764	Sciatica	symptoms	0.0309064	0.00162499	1.17618e-80	1.03139	7657	152619
172.2	Other non-epithelial cancer of skin	neoplasms	-0.0368834	0.0019598	5.17536e-79	0.963788	11445	151234
288.1	Decreased white blood cell count	hematopoietic	-0.0457034	0.00243415	1.18919e-78	0.955325	5774	156523
760	Back pain	symptoms	0.0194179	0.00103941	6.98458e-78	1.01961	24512	126567
172	Skin cancer	neoplasms	-0.0312438	0.00169397	5.80831e-76	0.969239	15107	147438
695.8	Other specified erythematous conditions	dermatologic	0.0611913	0.00334603	1.03573e-74	1.0631	1257	162554
415.11	Pulmonary embolism and infarction, acute	circulatory system	0.0385471	0.00212435	1.39693e-73	1.0393	4086	160495
771	Musculoskeletal symptoms referable to limbs	symptoms	0.0265409	0.00146351	1.68194e-73	1.0269	10192	146232
415.1	Acute pulmonary heart disease	circulatory system	0.0382941	0.00211578	3.23031e-73	1.03904	4129	160444
720.1	Spinal stenosis of lumbar region	musculoskeletal	0.037813	0.00213077	1.84402e-70	1.03854	5213	157798
496.3	Bronchiectasis	respiratory	-0.103523	0.00591792	1.6162e-68	0.901655	1335	163655
495.2	Asthma with exacerbation	respiratory	0.0355708	0.00206099	9.55491e-67	1.03621	3714	159295
277	Other disorders of metabolism	endocrine/metabolic	0.0296866	0.00172435	2.01079e-66	1.03013	6950	152944
720	Spinal stenosis	musculoskeletal	0.0304788	0.00178707	3.19792e-65	1.03095	7824	154062
112.3	Candidiasis of skin and nails	infectious diseases	0.0847125	0.00497105	4.06421e-65	1.0884	428	164306
740.2	Osteoarthrosis, generalized	musculoskeletal	0.0420967	0.0024821	1.62048e-64	1.043	3523	159919
562	Diverticulosis and diverticulitis	digestive	0.0243582	0.00143635	1.66893e-64	1.02466	13022	145713
260.3	Adult failure to thrive	endocrine/metabolic	-0.17104	0.0101685	1.72379e-63	0.842788	534	164170
327.31	Central/nonobstroctive sleep apnea	neurological	0.0737568	0.0043929	2.88872e-63	1.07654	720	164549
809	Fracture of unspecified bones	injuries & poisonings	0.0443111	0.00264316	4.43956e-63	1.04531	2534	159460
173	Neoplasm of uncertain behavior of skin	neoplasms	-0.0299383	0.0017881	6.36221e-63	0.970505	11338	145876
763	Thoracic or lumbosacral neuritis or radiculitis, unspecified	symptoms	0.027294	0.00163526	1.5274e-62	1.02767	8136	152925
261.2	Vitamin B-complex deficiencies	endocrine/metabolic	0.0338658	0.00204481	1.31487e-61	1.03445	4508	158965
702	Degenerative skin conditions and other dermatoses	dermatologic	-0.0285084	0.00177636	5.83004e-58	0.971894	12731	144774
260.6	Anorexia	endocrine/metabolic	-0.0852356	0.00532277	1.03021e-57	0.918296	1333	161470
726.4	Calcaneal spur; Exostosis NOS	musculoskeletal	0.0596636	0.00374334	3.41953e-57	1.06148	944	162769
649.1	Diabetes or abnormal glucose tolerance complicating pregnancy	pregnancy complications	0.0403233	0.00254488	1.52568e-56	1.04115	2238	162869
426	Cardiac conduction disorders	circulatory system	0.017831	0.00113274	7.86168e-56	1.01799	24274	125412
705.3	Hidradenitis	dermatologic	0.0586976	0.00376592	8.9872e-55	1.06045	730	164651
737	Curvature of spine	musculoskeletal	-0.0547025	0.00351734	1.53677e-54	0.946767	2738	160988
737.3	Kyphoscoliosis and scoliosis	musculoskeletal	-0.0581226	0.00376185	7.48239e-54	0.943534	2432	161765
550.4	Umbilical hernia	digestive	0.040142	0.0025994	8.43669e-54	1.04096	2499	161483
286	Coagulation defects	hematopoietic	0.0221269	0.00145179	1.88705e-52	1.02237	11911	146401
418	Nonspecific chest pain	circulatory system	0.015208	0.000999005	2.48407e-52	1.01532	28498	121160
707.2	Chronic ulcer of leg or foot	dermatologic	0.0516354	0.0033959	3.2655e-52	1.05299	1518	163510
550	Abdominal hernia	digestive	0.0200384	0.0013217	6.39954e-52	1.02024	14882	143367
327.7	Sleep related movement disorders	neurological	0.0397854	0.00263207	1.27772e-51	1.04059	2804	161079
452	Other venous embolism and thrombosis	circulatory system	0.0252616	0.00167755	3.03151e-51	1.02558	7733	154621
790	Nonspecific findings on examination of blood	symptoms	0.0198016	0.00131919	6.27174e-51	1.02	13852	141387
627.3	Postmenopausal atrophic vaginitis	genitourinary	-0.0541151	0.00360669	6.90274e-51	0.947323	2750	160690
621	Endometrial hyperplasia	genitourinary	0.071131	0.00475606	1.42595e-50	1.07372	518	164948
327.71	Restless legs syndrome	neurological	0.0439645	0.00294312	1.86313e-50	1.04495	2102	162644
512.1	Wheezing	respiratory	0.0416274	0.00280066	5.69068e-50	1.04251	2048	160753
706.1	Acne	dermatologic	-0.035367	0.00239933	3.54794e-49	0.965251	5029	156847
721	Spondylosis and allied disorders	musculoskeletal	0.0216249	0.00146885	4.63682e-49	1.02186	11091	147972
726	Peripheral enthesopathies and allied syndromes	musculoskeletal	0.018057	0.00122999	8.58093e-49	1.01822	16316	137934
773	Pain in limb	symptoms	0.0152449	0.0010394	1.04802e-48	1.01536	24986	125281
427.22	Atrial flutter	circulatory system	0.0318267	0.00218688	5.54971e-48	1.03234	5785	158037
721.1	Spondylosis without myelopathy	musculoskeletal	0.022022	0.00151777	1.05532e-47	1.02227	10214	149107
702.1	Actinic keratosis	dermatologic	-0.0363536	0.00252702	6.33792e-47	0.964299	6856	155072
562.1	Diverticulosis	digestive	0.0222492	0.00155772	2.78776e-46	1.0225	10856	147851
415.2	Chronic pulmonary heart disease	circulatory system	0.0296698	0.00207824	3.06834e-46	1.03011	5086	157704
706	Diseases of sebaceous glands	dermatologic	-0.0235757	0.00166181	1.10621e-45	0.9767	10071	145970
790.6	Other abnormal blood chemistry	symptoms	0.0190068	0.00134285	1.76296e-45	1.01919	13394	141571
483	Acute bronchitis and bronchiolitis	respiratory	0.0313719	0.00222011	2.45354e-45	1.03187	4150	155141
250.23	Type 2 diabetes with ophthalmic manifestations	endocrine/metabolic	0.040901	0.00290358	4.60601e-45	1.04175	2089	162844
280	Iron deficiency anemias	hematopoietic	0.0187935	0.00134151	1.36967e-44	1.01897	12081	147748
395.1	Nonrheumatic mitral valve disorders	circulatory system	-0.0280971	0.00201477	3.34996e-44	0.972294	8802	151745
722	Intervertebral disc disorders	musculoskeletal	0.0181608	0.00130689	6.67804e-44	1.01833	14385	143420
681.7	Cellulitis and abscess of trunk	dermatologic	0.0467506	0.00337103	9.85018e-44	1.04786	1280	162538
318	Tobacco use disorder	mental disorders	0.0152729	0.00110649	2.44727e-43	1.01539	22841	129910
702.2	Seborrheic keratosis	dermatologic	-0.0273065	0.00197867	2.53386e-43	0.973063	9736	148017
561.2	Flatulence	digestive	-0.0288071	0.00211213	2.34979e-42	0.971604	6535	152448
452.2	Deep vein thrombosis [DVT]	circulatory system	0.0264284	0.00194518	4.80709e-42	1.02678	5614	157445
172.21	Basal cell carcinoma	neoplasms	-0.0349344	0.00257736	7.46595e-42	0.965669	6205	157764
496.1	Emphysema	respiratory	-0.0425737	0.00315681	1.88274e-41	0.95832	3534	159886
627.1	Postmenopausal bleeding	genitourinary	0.0353471	0.00262433	2.38009e-41	1.03598	2648	161921
250.25	Diabetes type 2 with peripheral circulatory disorders	endocrine/metabolic	0.0554449	0.00415462	1.26061e-40	1.05701	1031	163899
459	Other disorders of circulatory system	circulatory system	0.0228206	0.00175738	1.47769e-38	1.02308	7686	150337
611	Abnormal findings on mammogram or breast exam	genitourinary	-0.0166939	0.00128882	2.26249e-38	0.983445	17165	142030
280.1	Iron deficiency anemias, unspecified or not due to blood loss	hematopoietic	0.0182434	0.00142765	2.15869e-37	1.01841	10467	149896
306	Other mental disorder	mental disorders	-0.0110843	0.000869312	3.09322e-37	0.988977	50766	93142
599.4	Urinary incontinence	genitourinary	0.0249365	0.00198326	2.95463e-36	1.02525	5440	156577
459.9	Circulatory disease NEC	circulatory system	0.025869	0.00205916	3.37925e-36	1.02621	5419	154197
507	Pleurisy; pleural effusion	respiratory	-0.0218487	0.00173923	3.40446e-36	0.978388	11075	148538
296.1	Bipolar	mental disorders	0.027663	0.0022275	2.06445e-35	1.02805	3403	161458
454.11	Varicose veins of lower extremity, symptomtic	circulatory system	0.0449369	0.00362345	2.55912e-35	1.04596	1417	163322
726.3	Bursitis	musculoskeletal	0.0405026	0.00327477	3.8895e-35	1.04133	1672	161979
728.7	Fasciitis	musculoskeletal	0.0311555	0.00252405	5.28399e-35	1.03165	3044	159454
707	Chronic ulcer of skin	dermatologic	0.0359136	0.00291829	8.36662e-35	1.03657	2352	161276
250.7	Diabetic retinopathy	endocrine/metabolic	0.0351649	0.0028577	8.47892e-35	1.03579	2205	162734
722.6	Degeneration of intervertebral disc	musculoskeletal	0.0198355	0.00161476	1.10624e-34	1.02003	8951	149992
550.2	Diaphragmatic hernia	digestive	0.023504	0.00191749	1.52771e-34	1.02378	6163	154505
610	Benign mammary dysplasias	genitourinary	-0.0234764	0.00192911	4.5181e-34	0.976797	7197	154796
610.1	Cystic mastopathy	genitourinary	-0.0261297	0.00214869	5.02811e-34	0.974209	5855	156670
696.4	Psoriasis	dermatologic	0.0292785	0.00241372	7.32552e-34	1.02971	3642	160695
172.22	Squamous cell carcinoma	neoplasms	-0.0422999	0.0034883	7.67075e-34	0.958582	3696	160492
713.5	Arthropathy associated with neurological disorders	musculoskeletal	0.0908278	0.00749059	7.73103e-34	1.09508	191	165585
288.11	Neutropenia	hematopoietic	-0.0348232	0.00289516	2.53014e-33	0.965776	3893	159887
327.6	Circadian rhythm sleep disorder	neurological	0.050862	0.00426603	9.02998e-33	1.05218	743	164071
429.2	Abnormal function study of cardiovascular system	circulatory system	0.0357932	0.00300285	9.34321e-33	1.03644	2611	160309
402	Elevated blood pressure reading without diagnosis of hypertension	circulatory system	0.0203099	0.00170431	9.67716e-33	1.02052	7175	151353
704.2	Hirsutism	dermatologic	0.0504677	0.00426874	2.98218e-32	1.05176	648	164584
555	Inflammatory bowel disease and other gastroenteritis and colitis	digestive	-0.0340249	0.00288318	3.8495e-32	0.966547	3851	160979
585	Renal failure	genitourinary	0.0152338	0.00131087	3.21644e-31	1.01535	17040	140900
338.1	Acute pain	neurological	0.0195775	0.00168678	3.8235e-31	1.01977	7336	144748
464	Acute sinusitis	respiratory	0.019502	0.00168918	7.80561e-31	1.01969	7363	149141
858	Complication of internal orthopedic device	injuries & poisonings	0.0352932	0.00305923	8.62099e-31	1.03592	2017	162883
411.3	Angina pectoris	circulatory system	0.0300226	0.00261225	1.43022e-30	1.03048	3644	158200
276.12	Hyposmolality and/or hyponatremia	endocrine/metabolic	-0.0340189	0.00296325	1.65794e-30	0.966553	3728	156353
257.1	Testicular hypofunction	endocrine/metabolic	0.0347782	0.00303561	2.17562e-30	1.03539	2560	162402
257	Testicular dysfunction	endocrine/metabolic	0.0347252	0.00303421	2.50423e-30	1.03534	2564	162377
287.3	Thrombocytopenia	hematopoietic	-0.0254858	0.002227	2.51947e-30	0.974836	6379	153048
569	Other disorders of intestine	digestive	-0.0245858	0.0021519	3.1304e-30	0.975714	6285	152408
414	Other forms of chronic heart disease	circulatory system	0.0251872	0.00221105	4.60904e-30	1.02551	5026	156789
287	Purpura and other hemorrhagic conditions	hematopoietic	-0.0241132	0.00211959	5.48526e-30	0.976175	7008	151700
300	Anxiety disorders	mental disorders	0.0106129	0.000935829	8.2556e-30	1.01067	33561	119181
835	Internal derangement of knee	injuries & poisonings	0.0297762	0.00263061	1.05506e-29	1.03022	2584	160328
428.3	Heart failure with reduced EF [Systolic or combined heart failure]	circulatory system	0.0233588	0.00206709	1.30673e-29	1.02363	5750	157624
457	Encounter for long-term (current) use of anticoagulants, antithrombotics, aspirin	circulatory system	0.0234834	0.00208812	2.41767e-29	1.02376	5851	150156
217	Vascular hamartomas and non-neoplastic nevi	neoplasms	-0.0456131	0.00406663	3.38639e-29	0.955412	2174	160328
696.41	Psoriasis vulgaris	dermatologic	0.0282935	0.00253677	6.89692e-29	1.0287	3298	161105
217.1	Nevus, non-neoplastic	neoplasms	-0.0465956	0.00418783	9.32929e-29	0.954473	2070	160598
696.42	Psoriatic arthropathy	dermatologic	0.0483148	0.00434626	1.04384e-28	1.0495	923	164743
457.3	Encounter for long-term (current) use of aspirin	circulatory system	0.0245065	0.00220854	1.30835e-28	1.02481	5092	151410
696	Psoriasis and related disorders	dermatologic	0.0263273	0.00237567	1.53292e-28	1.02668	3815	160138
840	Sprains and strains	injuries & poisonings	0.0149501	0.00135272	2.14678e-28	1.01506	12328	142986
497	Bronchitis	respiratory	0.0341374	0.00309496	2.73889e-28	1.03473	1961	160432
642.1	Preeclampsia and eclampsia	pregnancy complications	0.0347189	0.00314938	2.92621e-28	1.03533	1362	163846
562.2	Diverticulitis	digestive	0.0280368	0.00254346	2.95678e-28	1.02843	3567	160946
300.9	Posttraumatic stress disorder	mental disorders	0.0296273	0.00268985	3.25452e-28	1.03007	2237	162539
536.7	Complications of gastrostomy, colostomy and enterostomy	digestive	-0.132389	0.0121665	1.41414e-27	0.876001	332	165131
454.1	Varicose veins of lower extremity	circulatory system	0.0333092	0.00309826	5.86579e-27	1.03387	2133	161959
269	Proteinuria	endocrine/metabolic	0.0228748	0.00212836	6.08165e-27	1.02314	4525	159198
149	Cancer of larynx, pharynx, nasal cavities	neoplasms	-0.0564613	0.00528665	1.26293e-26	0.945103	1597	163934
512.8	Cough	respiratory	0.0122065	0.00114748	1.99078e-26	1.01228	19431	132610
198	Secondary malignant neoplasm	neoplasms	-0.0213268	0.00200725	2.28352e-26	0.978899	8192	153874
197	Chemotherapy	neoplasms	-0.0205941	0.00194369	3.13192e-26	0.979617	7969	153464
626.1	Irregular menstrual cycle/bleeding	genitourinary	0.0146015	0.0013796	3.5398e-26	1.01471	11505	147918
770	Myalgia and myositis unspecified	symptoms	0.019205	0.00182186	5.56635e-26	1.01939	6054	154699
938.2	Chronic dermatitis due to solar radiation	dermatologic	-0.0340181	0.00323654	7.7186e-26	0.966554	3501	158474
701.2	Scar conditions and fibrosis of skin	dermatologic	-0.0300859	0.00286261	7.77337e-26	0.970362	4184	155380
560.4	Other intestinal obstruction	digestive	-0.0360528	0.00343435	8.85073e-26	0.964589	2660	161707
276.5	Hypovolemia	endocrine/metabolic	-0.0271666	0.00258917	9.36235e-26	0.973199	4340	153735
594.1	Calculus of kidney	genitourinary	0.0177177	0.00169096	1.09153e-25	1.01788	8829	154208
443	Peripheral vascular disease	circulatory system	-0.0224729	0.00214667	1.20255e-25	0.977778	6998	155319
563	Constipation	digestive	-0.0161349	0.00155577	3.35916e-25	0.983995	10952	144321
560	Intestinal obstruction without mention of hernia	digestive	-0.0293984	0.00283662	3.61876e-25	0.97103	3744	158935
465	Acute upper respiratory infections of multiple or unspecified sites	respiratory	0.0123043	0.00118981	4.58078e-25	1.01238	16276	133134
250.6	Polyneuropathy in diabetes	endocrine/metabolic	0.0471214	0.00456481	5.56032e-25	1.04825	791	164426
594	Urinary calculus	genitourinary	0.0167437	0.00162271	5.81917e-25	1.01688	9814	152909
803	Fracture of upper limb	injuries & poisonings	-0.0322905	0.0031406	8.52667e-25	0.968225	3130	161823
300.1	Anxiety disorder	mental disorders	0.00984859	0.000961689	1.29984e-24	1.0099	31094	122230
727	Other disorders of synovium, tendon, and bursa	musculoskeletal	0.0155811	0.00152573	1.74847e-24	1.0157	10034	147743
686	Other local infections of skin and subcutaneous tissue	dermatologic	0.0258002	0.00252668	1.76902e-24	1.02614	2854	157706
499	Cystic fibrosis	respiratory	-0.16932	0.016594	1.9081e-24	0.844238	256	165504
453	Chronic venous hypertension	circulatory system	0.0938161	0.00922737	2.7789e-24	1.09836	135	165672
172.3	Carcinoma in situ of skin	neoplasms	-0.03577	0.00351948	2.88731e-24	0.964862	3534	160229
561	Symptoms involving digestive system	digestive	-0.01299	0.00127986	3.33037e-24	0.987094	17298	135929
426.7	Abnormal electrocardiogram [ECG] [EKG]	circulatory system	0.0143392	0.00141437	3.73622e-24	1.01444	12678	136830
938	Dermatitis due to solar radiation	dermatologic	-0.0286886	0.00283066	3.86608e-24	0.971719	4340	156826
476	Allergic rhinitis	respiratory	0.0108753	0.00107511	4.7171e-24	1.01093	21829	133281
290	Delirium dementia and amnestic and other cognitive disorders	mental disorders	-0.0489174	0.00484179	5.3483e-24	0.95226	1704	161588
216	Benign neoplasm of skin	neoplasms	-0.00843686	0.000835921	5.93923e-24	0.991599	68336	78390
355.1	Chronic pain syndrome	neurological	0.0332271	0.00329306	6.11486e-24	1.03379	1481	163225
585.33	Chronic Kidney Disease, Stage III	genitourinary	0.0225021	0.00223291	6.94824e-24	1.02276	5081	158587
348.2	Cerebral edema and compression of brain	neurological	0.0350664	0.00349527	1.09685e-23	1.03569	1311	163368
255	Disorders of adrenal glands	endocrine/metabolic	0.0277151	0.00276296	1.11449e-23	1.0281	2518	161843
228	Hemangioma and lymphangioma, any site	neoplasms	-0.0356541	0.0035652	1.51497e-23	0.964974	2603	158978
279.1	Immunity deficiency	endocrine/metabolic	-0.0237941	0.00238117	1.64209e-23	0.976487	5276	158643
425.1	Primary/intrinsic cardiomyopathies	circulatory system	0.0174182	0.00175701	3.63564e-23	1.01757	8242	154983
741	Symptoms and disorders of the joints	musculoskeletal	0.0154381	0.00155856	3.94495e-23	1.01556	9046	147289
480.1	Bacterial pneumonia	respiratory	-0.0407701	0.00412642	5.07064e-23	0.96005	1958	161551
276.6	Fluid overload	endocrine/metabolic	0.0281006	0.00284621	5.45251e-23	1.0285	2441	158740
949	Allergies, other	injuries & poisonings	0.0201885	0.00206111	1.18366e-22	1.02039	4467	155041
513.31	Apnea	respiratory	0.0602309	0.00617178	1.6868e-22	1.06208	371	164426
380.4	Impacted cerumen	sense organs	-0.0262056	0.00268701	1.79613e-22	0.974135	4368	155680
694	Dyschromia and Vitiligo	dermatologic	-0.0201959	0.00207083	1.79905e-22	0.980007	6215	151640
157	Pancreatic cancer	neoplasms	-0.0698581	0.00716544	1.8572e-22	0.932526	853	164796
741.4	Joint effusions	musculoskeletal	0.0204087	0.00210113	2.6489e-22	1.02062	4520	156347
244.2	Acquired hypothyroidism	endocrine/metabolic	0.0202455	0.00209124	3.62692e-22	1.02045	5051	158631
195	Cancer, suspected or other	neoplasms	-0.0201738	0.0020887	4.52227e-22	0.980028	7412	154368
626.12	Excessive or frequent menstruation	genitourinary	0.0204697	0.00212022	4.70268e-22	1.02068	3721	159352
694.2	Other dyschromia	dermatologic	-0.0207654	0.00215868	6.61462e-22	0.979449	5696	152401
280.2	Iron deficiency anemia secondary to blood loss (chronic)	hematopoietic	0.0218227	0.00226909	6.75279e-22	1.02206	3632	159649
427	Cardiac dysrhythmias	circulatory system	0.00878333	0.000918542	1.15231e-21	1.00882	44225	103554
291.8	Alteration of consciousness	mental disorders	0.0405513	0.00427882	2.61184e-21	1.04138	904	162405
555.1	Regional enteritis	digestive	-0.0370277	0.00392513	3.96626e-21	0.963649	2086	163370
371.3	Inflammation of eyelids	sense organs	-0.0288028	0.00307829	8.22296e-21	0.971608	3207	158894
279	Disorders involving the immune mechanism	endocrine/metabolic	-0.016772	0.00179832	1.09446e-20	0.983368	8571	152957
572	Ascites (non malignant)	digestive	-0.0292376	0.00313719	1.16667e-20	0.971186	3141	160150
528	Diseases of the oral soft tissues, excluding lesions specific for gingiva and tongue	digestive	-0.0281853	0.0030389	1.77904e-20	0.972208	3267	158011
800.1	Fracture of neck of femur	injuries & poisonings	-0.0785398	0.00847852	1.98049e-20	0.924465	604	164980
357	Inflammatory and toxic neuropathy	neurological	0.0195576	0.00211469	2.27733e-20	1.01975	5284	157043
277.4	Disorders of bilirubin excretion	endocrine/metabolic	-0.0524349	0.00567666	2.53672e-20	0.948916	1174	163057
149.5	Hx of malignant neoplasm of oral cavity and pharynx	neoplasms	-0.0739584	0.00802246	3.00136e-20	0.92871	737	164830
727.1	Synovitis and tenosynovitis	musculoskeletal	0.019862	0.00215495	3.05736e-20	1.02006	4500	156849
574.11	Cholelithiasis with acute cholecystitis	digestive	0.0520613	0.00566274	3.79695e-20	1.05344	451	164745
654.1	Abnormality of organs and soft tissues of pelvis complicating pregnancy, childbirth, or the puerperium	pregnancy complications	0.0245635	0.00269273	7.36377e-20	1.02487	2078	162767
426.3	Bundle branch block	circulatory system	0.020146	0.00220911	7.54382e-20	1.02035	5779	156001
510.2	Lung transplant	respiratory	-0.0684649	0.0075325	9.97121e-20	0.933826	738	164694
803.3	Fracture of clavicle or scapula	injuries & poisonings	-0.0776489	0.00854713	1.03895e-19	0.925289	592	164983
686.1	Carbuncle and furuncle	dermatologic	0.0349987	0.00385542	1.10809e-19	1.03562	972	163159
687.2	Localized superficial swelling, mass, or lump	dermatologic	0.019006	0.00209487	1.16146e-19	1.01919	4548	155656
381.1	Otitis media	sense organs	0.0228093	0.00251555	1.21988e-19	1.02307	3147	157803
574.12	Cholelithiasis with other cholecystitis	digestive	0.0479995	0.00530561	1.47042e-19	1.04917	519	163904
110.12	Althete's foot	infectious diseases	0.0348419	0.00388865	3.24986e-19	1.03546	1244	162571
788	Syncope and collapse	symptoms	-0.0165	0.00184581	3.92078e-19	0.983635	8290	151601
227	Benign neoplasm of other endocrine glands and related structures	neoplasms	0.0273402	0.00306171	4.27048e-19	1.02772	2066	162816
792	Abnormal Papanicolaou smear of cervix and cervical HPV	genitourinary	-0.0172873	0.00193722	4.50532e-19	0.982861	5986	156562
458.1	Orthostatic hypotension	circulatory system	-0.0437123	0.00490035	4.65243e-19	0.957229	1435	162177
627.2	Symptomatic menopause	genitourinary	-0.0221105	0.00248071	4.96797e-19	0.978132	4497	157622
990	Effects radiation NOS	injuries & poisonings	-0.027584	0.00310201	5.9847e-19	0.972793	3344	159499
790.1	Elevated sedimentation rate	symptoms	0.0464094	0.00522662	6.72061e-19	1.0475	543	164757
31	Diseases due to other mycobacteria	infectious diseases	-0.106856	0.0120453	7.24033e-19	0.898655	315	165393
227.1	Benign neoplasm of adrenal gland	neoplasms	0.0421512	0.00476859	9.62775e-19	1.04305	775	164651
555.2	Ulcerative colitis	digestive	-0.0330901	0.00375312	1.1789e-18	0.967451	2262	162650
425	Cardiomyopathy	circulatory system	0.0149281	0.0016942	1.23716e-18	1.01504	9074	153850
819	Skull and face fracture and other intercranial injury	injuries & poisonings	-0.0353271	0.00401075	1.27277e-18	0.96529	1861	162703
54	Herpes simplex	infectious diseases	-0.0197882	0.00225516	1.71458e-18	0.980406	4732	158494
726.1	Enthesopathy	musculoskeletal	0.014328	0.00163522	1.91628e-18	1.01443	8330	149839
728	Disorders of muscle, ligament, and fascia	musculoskeletal	0.023038	0.00262946	1.92683e-18	1.02331	2919	159711
1011	Complications of surgical and medical procedures	symptoms	0.0174192	0.00199434	2.45119e-18	1.01757	5368	151124
740.12	Osteoarthrosis, localized, secondary	musculoskeletal	0.0392443	0.00450768	3.14497e-18	1.04002	862	163941
532	Dysphagia	digestive	-0.0155036	0.00178567	3.87981e-18	0.984616	9088	150967
411.2	Myocardial infarction	circulatory system	0.0178652	0.00206066	4.33376e-18	1.01803	6702	156148
355	Complex regional/central pain syndrome	neurological	0.0258464	0.00299565	6.24518e-18	1.02618	1927	162274
611.3	Lump or mass in breast	genitourinary	-0.0153209	0.00178188	8.10019e-18	0.984796	7608	154623
288	Diseases of white blood cells	hematopoietic	-0.0147577	0.00171723	8.40804e-18	0.985351	9672	146442
599.2	Retention of urine	genitourinary	-0.0263823	0.00307317	9.10633e-18	0.973963	3807	158036
1013	Asphyxia and hypoxemia	symptoms	0.0206458	0.00240506	9.1379e-18	1.02086	3796	157264
731	Osteitis deformans and osteopathies associated with other disorders classified elsewhere	musculoskeletal	0.0326978	0.00382124	1.15999e-17	1.03324	1403	163480
367	Disorders of refraction and accommodation; blindness and low vision	sense organs	-0.013149	0.00153789	1.23039e-17	0.986937	11485	147204
687	Symptoms affecting skin	dermatologic	0.00988388	0.00115723	1.33048e-17	1.00993	18786	130525
735.1	Flat foot	musculoskeletal	0.0389627	0.00456366	1.3705e-17	1.03973	746	164173
284	Aplastic anemia	hematopoietic	-0.0380409	0.00448272	2.13686e-17	0.962674	1699	162156
585.4	Chronic kidney disease, Stage I or II	genitourinary	0.0251069	0.0029826	3.8371e-17	1.02542	2397	161252
367.1	Myopia	sense organs	-0.0170211	0.00202394	4.10427e-17	0.983123	6428	155009
110.1	Dermatophytosis	infectious diseases	0.0173999	0.00206975	4.21476e-17	1.01755	5256	154053
145	Cancer of mouth	neoplasms	-0.0487041	0.0057935	4.21809e-17	0.952463	1275	164301
743.13	Other specified osteoporosis	musculoskeletal	-0.0902173	0.0107438	4.57522e-17	0.913733	367	165166
264.2	Failure to thrive (childhood)	endocrine/metabolic	-0.163807	0.0195425	5.19949e-17	0.848906	137	165733
792.1	Papanicolaou smear of cervix or vagina with atypical squamous cells	genitourinary	-0.0193898	0.00233333	9.57677e-17	0.980797	4070	159078
803.2	Fracture of radius and ulna	injuries & poisonings	-0.0369023	0.00444132	9.66173e-17	0.96377	1534	163870
695	Erythematous conditions	dermatologic	0.0139027	0.00167498	1.03946e-16	1.014	8137	150081
802	Fracture of pelvis	injuries & poisonings	-0.0802469	0.0096701	1.05469e-16	0.922888	431	165224
165	Cancer within the respiratory system	neoplasms	-0.0270884	0.00326808	1.1441e-16	0.973275	3279	161860
756.2	Pectus and other congenital anomalies of ribs/sternum	congenital anomalies	-0.171346	0.0206726	1.14633e-16	0.84253	162	165633
80	Postoperative infection	infectious diseases	0.0364418	0.00440653	1.34001e-16	1.03711	917	163383
455	Hemorrhoids	circulatory system	-0.0125019	0.00152192	2.12985e-16	0.987576	12585	143709
558	Noninfectious gastroenteritis	digestive	-0.0194923	0.00238318	2.8592e-16	0.980696	4792	155449
117.4	Aspergillosis	infectious diseases	-0.100619	0.0123148	3.06848e-16	0.904277	311	165401
585.3	Chronic renal failure [CKD]	genitourinary	0.0124209	0.0015203	3.08359e-16	1.0125	12191	148770
701.6	Acquired acanthosis nigricans	dermatologic	0.0707533	0.00870646	4.41782e-16	1.07332	117	165486
381	Otitis media and Eustachian tube disorders	sense organs	0.0169006	0.00208082	4.58126e-16	1.01704	4930	153902
722.1	Displacement of intervertebral disc	musculoskeletal	0.0157933	0.00194883	5.31718e-16	1.01592	5723	155712
165.1	Cancer of bronchus; lung	neoplasms	-0.0268657	0.00331629	5.44568e-16	0.973492	3171	162019
426.21	First degree AV block	circulatory system	0.0311982	0.00385939	6.28274e-16	1.03169	1672	161735
687.4	Disturbance of skin sensation	dermatologic	0.0114909	0.00142226	6.51227e-16	1.01156	11292	144351
394.2	Mitral valve disease	circulatory system	-0.0283314	0.00350844	6.73533e-16	0.972066	2736	162036
579.2	Splenomegaly	digestive	0.0324633	0.00402099	6.83321e-16	1.033	1244	163323
371	Inflammation of the eye	sense organs	-0.0196774	0.00243823	7.00916e-16	0.980515	4625	156700
790.8	Elevated C-reactive protein (CRP)	symptoms	0.0506587	0.00630096	8.9957e-16	1.05196	392	164924
284.1	Pancytopenia	hematopoietic	-0.037068	0.00463404	1.25362e-15	0.963611	1588	162345
198.4	Secondary malignant neoplasm of liver	neoplasms	-0.036596	0.00457753	1.29877e-15	0.964066	1617	163669
577	Diseases of pancreas	digestive	-0.0210469	0.00264289	1.67128e-15	0.979173	4376	159640
458	Hypotension	circulatory system	-0.0191999	0.00241865	2.05045e-15	0.980983	5014	152145
195.1	Malignant neoplasm, other	neoplasms	-0.020391	0.00256996	2.11564e-15	0.979816	4800	157545
743.2	Pathologic fracture	musculoskeletal	-0.039839	0.0050218	2.13556e-15	0.960944	1361	163404
556	Ulceration of the lower GI tract	digestive	-0.0431699	0.00544443	2.20583e-15	0.957749	1098	163392
78	Viral warts & HPV	infectious diseases	-0.0189475	0.00239334	2.43757e-15	0.981231	4474	156744
401.3	Other hypertensive complications	circulatory system	0.0199376	0.00252718	3.03944e-15	1.02014	3091	160488
305.21	Anorexia nervosa	mental disorders	-0.153883	0.0196984	5.63179e-15	0.857372	168	165639
756.21	Pectus excavatum	congenital anomalies	-0.173837	0.0222664	5.85074e-15	0.840434	142	165687
228.1	Hemangioma of skin and subcutaneous tissue	neoplasms	-0.0460965	0.0059056	5.92348e-15	0.95495	1080	161950
565	Anal and rectal conditions	digestive	-0.0166308	0.00213148	6.0698e-15	0.983507	6088	154603
587	Kidney replaced by transpant	genitourinary	-0.0279014	0.00359351	8.20356e-15	0.972484	2252	163147
130.1	Lyme disease	infectious diseases	-0.0325766	0.00420688	9.66111e-15	0.967948	1944	162888
255.11	Cushing's syndrome	endocrine/metabolic	0.0538858	0.00701108	1.5203e-14	1.05536	277	165431
555.21	Ulcerative colitis (chronic)	digestive	-0.0433147	0.00564948	1.76036e-14	0.95761	1078	164386
389.1	Sensorineural hearing loss	sense organs	-0.0164306	0.00214395	1.80648e-14	0.983704	7402	154991
130	Spirochetal infection	infectious diseases	-0.0317276	0.00414411	1.91682e-14	0.96877	1990	162780
575.2	Obstruction of bile duct	digestive	-0.047059	0.00617658	2.5576e-14	0.954031	906	164470
526	Diseases of the jaws	digestive	-0.0237723	0.00313263	3.23344e-14	0.976508	2825	159648
189.1	Cancer of kidney and renal pelvis	neoplasms	0.0260071	0.00343726	3.84243e-14	1.02635	2101	163430
375.1	Dry eyes	sense organs	-0.0210765	0.00279169	4.36148e-14	0.979144	3546	159260
149.1	Cancer of oropharynx	neoplasms	-0.0631603	0.00836609	4.36733e-14	0.938793	664	165049
145.2	Cancer of tongue	neoplasms	-0.0594503	0.00788748	4.79819e-14	0.942282	747	164975
429	Ill-defined descriptions and complications of heart disease	circulatory system	0.0120807	0.00160446	5.09532e-14	1.01215	10719	145197
459.7	Blood vessel replaced	circulatory system	0.0272552	0.00363483	6.46285e-14	1.02763	1585	162485
626	Disorders of menstruation and other abnormal bleeding from female genital tract	genitourinary	0.00921641	0.00123262	7.60014e-14	1.00926	17052	141829
317	Alcohol-related disorders	mental disorders	-0.0208535	0.0027952	8.62161e-14	0.979362	3563	159030
394	Rheumatic disease of the heart valves	circulatory system	-0.0191048	0.00256305	9.05856e-14	0.981077	4967	157446
290.1	Dementias	mental disorders	-0.0435721	0.00584588	9.09142e-14	0.957364	1182	163929
381.11	Suppurative and unspecified otitis media	sense organs	0.0238409	0.00321418	1.19427e-13	1.02413	1844	160311
963	Poisoning by primarily systemic agents	injuries & poisonings	-0.0183282	0.00248324	1.57396e-13	0.981839	4749	158599
189.11	Malignant neoplasm of kidney, except pelvis	neoplasms	0.0259507	0.00353745	2.20069e-13	1.02629	1973	163602
622.1	Polyp of corpus uteri	genitourinary	0.0245654	0.00338335	3.85207e-13	1.02487	1479	163018
713	Arthropathy associated with other disorders classified elsewhere	musculoskeletal	0.05061	0.00700102	4.86755e-13	1.05191	318	165353
411.1	Unstable angina (intermediate coronary syndrome)	circulatory system	0.0314124	0.00434718	4.97638e-13	1.03191	1300	162660
963.1	Antineoplastic and immunosuppressive drugs causing adverse effects	injuries & poisonings	-0.0179298	0.00248867	5.82288e-13	0.98223	4716	158678
741.3	Difficulty in walking	musculoskeletal	0.0340196	0.00472579	6.07894e-13	1.0346	864	163002
110	Dermatophytosis / Dermatomycosis	infectious diseases	0.014077	0.00195646	6.24048e-13	1.01418	5926	152579
317.1	Alcoholism	mental disorders	-0.0229035	0.00319349	7.3938e-13	0.977357	2730	160337
743.12	Senile osteoporosis	musculoskeletal	-0.137731	0.0192076	7.46434e-13	0.871333	152	165346
375	Disorders of lacrimal system	sense organs	-0.0204541	0.00286978	1.02269e-12	0.979754	3370	159649
727.6	Rupture of tendon, nontraumatic	musculoskeletal	0.0259165	0.0036388	1.06182e-12	1.02626	1684	162957
638	Other high-risk pregnancy	pregnancy complications	0.011302	0.00159306	1.29804e-12	1.01137	8717	155332
804	Fracture of hand or wrist	injuries & poisonings	-0.0255628	0.00360729	1.37621e-12	0.974761	2120	162717
480.12	Pseudomonal pneumonia	respiratory	-0.120873	0.0170641	1.40588e-12	0.886146	177	165416
574.3	Cholecystitis without cholelithiasis	digestive	0.0308391	0.00437132	1.72752e-12	1.03132	1012	163627
550.3	Femoral hernia	digestive	-0.143754	0.020591	2.92235e-12	0.866101	132	165738
70	Viral hepatitis	infectious diseases	-0.0176763	0.00253225	2.9419e-12	0.982479	4551	159620
277.51	Lipoprotein disorders	endocrine/metabolic	0.0261441	0.00375363	3.28373e-12	1.02649	1644	163366
556.1	Ulceration of intestine	digestive	-0.0405275	0.00582197	3.37556e-12	0.960283	946	163726
291	Other specified nonpsychotic and/or transient mental disorders	mental disorders	0.0228564	0.00328633	3.52549e-12	1.02312	1770	160756
426.9	Cardiac pacemaker/device in situ	circulatory system	0.0129409	0.00186431	3.88226e-12	1.01303	8393	155857
860	Bone marrow or stem cell transplant	neoplasms	-0.0408941	0.00589967	4.16139e-12	0.959931	993	164516
255.1	Adrenal hyperfunction	endocrine/metabolic	0.0337351	0.00489056	5.27432e-12	1.03431	705	164869
627.22	Need for Hormone replacement therapy (postmenopausal)	genitourinary	-0.0449137	0.00651607	5.47215e-12	0.95608	798	164339
151	Cancer of stomach	neoplasms	-0.0696066	0.0101141	5.897e-12	0.932761	434	165200
395	Heart valve disorders	circulatory system	-0.0103742	0.00150778	5.96586e-12	0.989679	15843	143461
527.7	Disturbance of salivary secretion	digestive	-0.0270545	0.00393987	6.56273e-12	0.973308	2085	162133
150	Cancer of esophagus	neoplasms	-0.0729915	0.0106589	7.49211e-12	0.929609	432	165335
246	Other disorders of thyroid	endocrine/metabolic	0.0144499	0.00211482	8.33507e-12	1.01455	4941	157468
117	Mycoses	infectious diseases	-0.0441828	0.00649294	1.0123e-11	0.956779	813	164215
198.6	Secondary malignancy of bone	neoplasms	-0.0258571	0.00380454	1.07282e-11	0.974474	2235	162974
530.3	Stricture and stenosis of esophagus	digestive	-0.0364426	0.00538264	1.28437e-11	0.964213	1149	163866
573.5	Jaundice (not of newborn)	digestive	-0.0381091	0.00563422	1.34367e-11	0.962608	1086	163701
198.2	Secondary malignancy of respiratory organs	neoplasms	-0.0318461	0.00474535	1.9328e-11	0.968656	1488	163447
705	Disorders of sweat glands	dermatologic	0.017977	0.00268192	2.0415e-11	1.01814	2520	160523
180.3	Cervical intraepithelial neoplasia [CIN] [Cervical dysplasia]	neoplasms	-0.0227148	0.00339252	2.14837e-11	0.977541	1969	162806
765	Cervical radiculitis	symptoms	0.0143605	0.00215475	2.65416e-11	1.01446	4650	157759
805	Fracture of vertebral column without mention of spinal cord injury	injuries & poisonings	-0.0272728	0.00409389	2.7046e-11	0.973096	1911	162977
8.52	Intestinal infection due to C. difficile	infectious diseases	-0.0315778	0.0047509	2.99753e-11	0.968916	1331	163458
559	Ileostomy status	digestive	-0.0481913	0.00725807	3.1437e-11	0.952951	661	164918
729.3	Panniculitis	musculoskeletal	0.0639504	0.00964154	3.29377e-11	1.06604	120	165598
626.13	Irregular menstrual cycle	genitourinary	0.0149173	0.00225157	3.46586e-11	1.01503	3568	158789
198.3	Secondary malignant neoplasm of digestive systems	neoplasms	-0.0375302	0.00566665	3.5202e-11	0.963165	1011	164036
193	Thyroid cancer	neoplasms	0.0175386	0.00265285	3.81192e-11	1.01769	3077	162448
528.1	Stomatitis and mucositis	digestive	-0.0347399	0.00526212	4.05952e-11	0.965857	1176	162670
622	Polyp of female genital organs	genitourinary	0.0197667	0.0030027	4.61106e-11	1.01996	1975	161970
263	Other nutritional deficiency	endocrine/metabolic	0.0206348	0.00313869	4.8872e-11	1.02085	1911	161665
870.3	Other open wound of head and face	injuries & poisonings	-0.0461083	0.00703669	5.65583e-11	0.954938	640	163796
389	Hearing loss	sense organs	-0.00969463	0.00148003	5.7424e-11	0.990352	14655	144127
605	Erectile dysfunction [ED]	genitourinary	0.0138388	0.00213144	8.4315e-11	1.01393	7689	154762
418.1	Precordial pain	circulatory system	0.0219032	0.00337378	8.45929e-11	1.02214	1809	161358
180	Cervical cancer and dysplasia	neoplasms	-0.0198097	0.00305666	9.12257e-11	0.980385	2419	162232
526.4	Temporomandibular joint disorders	digestive	-0.0275125	0.00424906	9.48385e-11	0.972863	1545	162333
573	Other disorders of liver	digestive	0.00914515	0.00141277	9.59426e-11	1.00919	12600	144467
198.5	Secondary malignancy of brain/spine	neoplasms	-0.036305	0.0056113	9.80172e-11	0.964346	1063	164453
577.2	Chronic pancreatitis	digestive	-0.0575233	0.00889976	1.02332e-10	0.9441	435	164995
426.32	Left bundle branch block	circulatory system	0.0209976	0.00325055	1.04905e-10	1.02122	2511	161459
71	Human immunodeficiency virus [HIV] disease	infectious diseases	-0.0261105	0.00405411	1.19079e-10	0.974227	1622	164055
292	Neurological disorders	mental disorders	-0.0106994	0.00166484	1.30414e-10	0.989358	10563	148041
513.32	Orthopnea	respiratory	0.0519731	0.00809977	1.39345e-10	1.05335	209	165067
380.1	Otitis externa	sense organs	0.0235544	0.00367587	1.47592e-10	1.02383	1446	161406
575.8	Other disorders of biliary tract	digestive	-0.0297532	0.00465711	1.6723e-10	0.970685	1394	163282
1005	Other symptoms	symptoms	0.0117723	0.00184312	1.68992e-10	1.01184	6223	148575
454	Varicose veins	circulatory system	0.018315	0.00287196	1.80376e-10	1.01848	2757	160790
697	Sarcoidosis	dermatologic	0.0216582	0.00341768	2.34142e-10	1.02189	1626	163972
81.1	Graft-versus-host disease	infectious diseases	-0.0711174	0.0112261	2.37342e-10	0.931353	347	165372
480.5	Bronchopneumonia and lung abscess	respiratory	-0.080212	0.0126823	2.53719e-10	0.922921	251	165135
281.9	Deficiency anemias	hematopoietic	-0.0643491	0.010191	2.71397e-10	0.937678	357	164753
110.13	Dermatophytosis of the body	infectious diseases	0.0300005	0.00478281	3.55133e-10	1.03046	816	162658
557.1	Celiac disease	digestive	-0.0348098	0.00555564	3.71235e-10	0.965789	1020	164480
473.4	Voice disturbance	respiratory	-0.0180256	0.00287862	3.80353e-10	0.982136	3491	159428
306.1	Mental disorders durring/after pregnancy	mental disorders	0.0195082	0.00311602	3.8345e-10	1.0197	1654	162912
112	Candidiasis	infectious diseases	0.0121761	0.00194589	3.91631e-10	1.01225	4911	153516
501	Pneumonitis due to inhalation of food or vomitus	respiratory	-0.0509251	0.00814324	4.00942e-10	0.95035	550	164066
339	Other headache syndromes	neurological	0.0082392	0.00131851	4.13381e-10	1.00827	12856	142043
496.21	Obstructive chronic bronchitis	respiratory	0.0263625	0.0042552	5.81578e-10	1.02671	1119	163658
249	Secondary diabetes mellitus	endocrine/metabolic	0.0172938	0.00279387	6.02029e-10	1.01744	2735	161419
807	Fracture of ribs	injuries & poisonings	-0.0336465	0.00546194	7.26659e-10	0.966913	1091	163897
508	Pulmonary collapse; interstitial and compensatory emphysema	respiratory	0.00837757	0.00136536	8.47286e-10	1.00841	15326	140688
71.1	HIV infection, symptomatic	infectious diseases	-0.0253588	0.00414626	9.59136e-10	0.97496	1542	164175
573.2	Liver replaced by transplant	digestive	-0.0377835	0.00619096	1.04088e-09	0.962921	932	164616
574.2	Calculus of bile duct	digestive	0.0278047	0.00456354	1.10957e-09	1.02819	944	164164
79.2	Infectious mononucleosis	infectious diseases	-0.0418126	0.00686974	1.15417e-09	0.95905	702	164801
159	Malignant neoplasm of other and ill-defined sites within the digestive organs and peritoneum	neoplasms	-0.033317	0.00548039	1.20698e-09	0.967232	1097	164053
300.12	Agorophobia, social phobia, and panic disorder	mental disorders	0.0164637	0.00271351	1.3005e-09	1.0166	2572	161535
513.8	Disorders of diaphragm	respiratory	0.027181	0.00448638	1.37357e-09	1.02755	1038	163140
474.2	Chronic tonsillitis and adenoiditis	respiratory	0.0219077	0.00363952	1.75075e-09	1.02215	1295	163321
480.2	Viral pneumonia	respiratory	0.0349869	0.00584974	2.21865e-09	1.03561	496	164288
514.2	Solitary pulmonary nodule	respiratory	-0.0113035	0.00189375	2.38958e-09	0.98876	8441	152422
509.1	Respiratory failure	respiratory	0.0159646	0.00269754	3.25514e-09	1.01609	3118	158163
1010	Other tests	symptoms	-0.00592525	0.001003	3.47317e-09	0.994092	115437	34563
253.3	Diabetes insipidus	endocrine/metabolic	0.0495557	0.00842976	4.13582e-09	1.0508	207	165513
526.42	Arthralgia/ankylosis of temporomandibular joint	digestive	-0.0454097	0.00775066	4.66191e-09	0.955606	512	164387
709.3	Systemic sclerosis	dermatologic	-0.0509834	0.00871351	4.88407e-09	0.950294	420	165359
276.14	Hypopotassemia	endocrine/metabolic	0.0121348	0.0020752	4.98938e-09	1.01221	5006	153967
216.1	Screening for malignant neoplasms of the skin	neoplasms	-0.00493458	0.000844114	5.0394e-09	0.995078	61899	85958
836	Traumatic arthropathy	injuries & poisonings	0.0376771	0.00644823	5.12669e-09	1.0384	417	164959
260.7	Polyphagia	endocrine/metabolic	0.0703893	0.0120516	5.19882e-09	1.07293	75	165685
496.2	Chronic bronchitis	respiratory	0.0190446	0.00326406	5.39098e-09	1.01923	2075	162152
380	Disorders of external ear	sense organs	-0.0158923	0.00272568	5.52324e-09	0.984233	3928	155653
290.11	Alzheimer's disease	mental disorders	-0.0650382	0.0111567	5.55928e-09	0.937032	381	165309
674	Other complications of the puerperium NEC	pregnancy complications	0.0380552	0.00653341	5.72147e-09	1.03879	290	164970
260.22	Nutritional marasmus	endocrine/metabolic	-0.231112	0.0397463	6.07489e-09	0.79365	43	165827
332	Parkinson's disease	neurological	-0.0385066	0.00663819	6.60083e-09	0.962225	1002	164690
426.92	Cardiac defibrillator in situ	circulatory system	0.014384	0.00248212	6.82951e-09	1.01449	4291	160728
276.13	Hyperpotassemia	endocrine/metabolic	-0.0155377	0.00268986	7.63187e-09	0.984582	4012	157080
557	Intestinal malabsorption (non-celiac)	digestive	-0.0246419	0.0043048	1.0387e-08	0.975659	1531	163456
592.13	Chronic interstitial cystitis	genitourinary	-0.0385376	0.00673279	1.04126e-08	0.962196	643	164981
241	Nontoxic nodular goiter	endocrine/metabolic	0.0086694	0.00151735	1.10668e-08	1.00871	10162	152793
426.2	Atrioventricular [AV] block	circulatory system	0.0155919	0.00273278	1.15991e-08	1.01571	3873	159045
536	Disorders of function of stomach	digestive	-0.0169888	0.0029824	1.22397e-08	0.983155	2868	159957
520	Disorders of tooth development	digestive	-0.0363844	0.00639198	1.2542e-08	0.96427	736	164689
451	Phlebitis and thrombophlebitis	circulatory system	0.0249499	0.00438421	1.26396e-08	1.02526	1051	163643
585.1	Acute renal failure	genitourinary	0.00974207	0.00171297	1.29104e-08	1.00979	8745	149912
625	Pain and other symptoms associated with female genital organs	genitourinary	-0.0127361	0.00224252	1.3519e-08	0.987345	4432	156428
752.1	Neural tube defects	congenital anomalies	0.0396099	0.00698417	1.41645e-08	1.0404	302	165439
425.12	Other hypertrophic cardiomyopathy	circulatory system	0.0294306	0.00520543	1.56913e-08	1.02987	776	164791
626.15	Infertility, female, associated with anovulation	genitourinary	0.036519	0.00646805	1.64163e-08	1.03719	330	165233
286.8	Hypercoagulable state	hematopoietic	0.0207007	0.00367576	1.78468e-08	1.02092	1437	163442
592	Cystitis and urethritis	genitourinary	-0.0152719	0.00272787	2.16248e-08	0.984844	3539	157638
149.4	Cancer of larynx	neoplasms	-0.0617972	0.0110503	2.24029e-08	0.940073	384	165391
736.4	Genu valgum or varum (acquired)	musculoskeletal	0.0616694	0.0110533	2.41489e-08	1.06361	104	165333
733.4	Aseptic necrosis of bone	musculoskeletal	-0.0275558	0.00493912	2.41795e-08	0.97282	1099	164252
277.5	Other disorders of lipoid metabolism	endocrine/metabolic	0.0191086	0.00342535	2.42489e-08	1.01929	2060	162493
740.3	Osteoarthrosis involving more than one site, but not specified as generalized	musculoskeletal	0.0387856	0.00696495	2.56677e-08	1.03955	389	165050
473	Diseases of the larynx and vocal cords	respiratory	-0.0136741	0.00246676	2.96724e-08	0.986419	4670	157633
244.1	Secondary hypothyroidism	endocrine/metabolic	0.0160553	0.00292084	3.8671e-08	1.01618	2463	162262
253	Disorders of the pituitary gland and its hypothalamic control	endocrine/metabolic	0.0179267	0.00327162	4.26595e-08	1.01809	1892	162838
427.12	Paroxysmal ventricular tachycardia	circulatory system	0.0121609	0.00221942	4.26974e-08	1.01224	5527	158099
352.2	Facial nerve disorders [CN7]	neurological	0.0246049	0.0045153	5.05869e-08	1.02491	989	164339
654	Other and unspecified complications of birth; puerperium affecting management of mother	pregnancy complications	0.0126435	0.00232129	5.13016e-08	1.01272	3278	161212
420.2	Pericarditis	circulatory system	-0.0175231	0.00322581	5.56793e-08	0.98263	2745	160847
695.9	Unspecified erythematous condition	dermatologic	0.0304683	0.00561198	5.66255e-08	1.03094	535	162633
626.11	Absent or infrequent menstruation	genitourinary	0.0131743	0.00243239	6.08878e-08	1.01326	3075	159738
189	Cancer of urinary organs (incl. kidney and bladder)	neoplasms	0.0149219	0.00276192	6.56344e-08	1.01503	3929	161278
625.1	Dyspareunia	genitourinary	-0.0348331	0.00645591	6.83215e-08	0.965767	641	163891
301.2	Antisocial/borderline personality disorder	mental disorders	0.0420779	0.00780435	6.98338e-08	1.04298	217	165464
498	Acute bronchospasm	respiratory	0.0448081	0.00835294	8.12406e-08	1.04583	222	164953
738.4	Acquired spondylolisthesis	musculoskeletal	0.0163966	0.00305872	8.29464e-08	1.01653	2416	160931
367.2	Astigmatism	sense organs	-0.0110843	0.00207237	8.86331e-08	0.988977	5978	154869
208	Benign neoplasm of colon	neoplasms	0.00675646	0.00126369	8.96157e-08	1.00678	18746	140550
594.3	Calculus of ureter	genitourinary	0.0236071	0.00442034	9.26649e-08	1.02389	1157	163903
604.3	Peyronie's disease	genitourinary	-0.072867	0.0136501	9.38801e-08	0.929724	270	165456
345	Epilepsy, recurrent seizures, convulsions	neurological	-0.0116257	0.0021814	9.85116e-08	0.988442	5201	159088
136	Other infectious and parasitic diseases	infectious diseases	-0.0135838	0.00255027	1.00157e-07	0.986508	3834	157956
704.1	Alopecia	dermatologic	-0.013626	0.00256059	1.02963e-07	0.986466	3711	159201
286.9	Abnormal coagulation profile	hematopoietic	0.0224672	0.00422431	1.04608e-07	1.02272	985	162540
420	Carditis	circulatory system	-0.0136527	0.00257128	1.09805e-07	0.98644	4334	158289
198.1	Secondary malignancy of lymph nodes	neoplasms	-0.0162224	0.00305941	1.14241e-07	0.983908	3269	159496
592.1	Cystitis	genitourinary	-0.0152713	0.00288934	1.25427e-07	0.984845	3118	158395
211	Benign neoplasm of other parts of digestive system	neoplasms	0.014298	0.00270596	1.2647e-07	1.0144	3101	160736
474	Acute and chronic tonsillitis	respiratory	0.0171566	0.00325833	1.39843e-07	1.0173	1675	162443
510	Other diseases of lung	respiratory	-0.0123652	0.00235546	1.52449e-07	0.987711	5096	154879
292.4	Altered mental status	mental disorders	-0.0140285	0.00267295	1.53494e-07	0.986069	3905	157892
195.3	Malignant neoplasm of head, face, and neck	neoplasms	-0.0357173	0.0068269	1.67833e-07	0.964913	834	164595
618.2	Uterine/Uterovaginal prolapse	genitourinary	-0.0318543	0.00608907	1.68245e-07	0.968648	796	164659
333.4	Torsion dystonia	neurological	-0.0358375	0.00689715	2.03635e-07	0.964797	673	164706
41.12	Methicillin resistant Staphylococcus aureus	infectious diseases	0.0235415	0.00453357	2.0726e-07	1.02382	930	164210
426.31	Right bundle branch block	circulatory system	0.0157993	0.0030575	2.37393e-07	1.01592	3023	160093
289.4	Lymphadenitis	hematopoietic	-0.00932077	0.00180498	2.41829e-07	0.990723	8156	150648
818	Intracranial hemorrhage (injury)	injuries & poisonings	-0.0364425	0.00705891	2.43512e-07	0.964214	688	164752
585.32	End stage renal disease	genitourinary	-0.0136901	0.00265274	2.45966e-07	0.986403	3745	161337
286.81	Primary hypercoagulable state	hematopoietic	0.0193225	0.00375084	2.58372e-07	1.01951	1395	163576
1014	Effects of heat, cold and air pressure	symptoms	-0.0733354	0.0142461	2.63618e-07	0.929289	206	165140
984	Toxic effect of lead and its compounds (including fumes)	injuries & poisonings	0.0637761	0.0124125	2.77619e-07	1.06585	105	165765
414.2	ASCVD	circulatory system	0.0211468	0.00411575	2.77665e-07	1.02137	1709	163269
577.3	Cyst and pseudocyst of pancreas	digestive	-0.024754	0.00482013	2.81339e-07	0.97555	1427	163830
345.3	Convulsions	neurological	-0.0128454	0.00250622	2.96895e-07	0.987237	3889	160535
530.13	Barrett's esophagus	digestive	0.0185523	0.00362477	3.08462e-07	1.01873	2132	163098
70.3	Viral hepatitis C	infectious diseases	-0.0173163	0.00339191	3.30466e-07	0.982833	2421	162955
611.1	Abnormal mammogram	genitourinary	-0.00760794	0.00149609	3.67188e-07	0.992421	11615	147966
840.2	Rotator cuff (capsule) sprain	injuries & poisonings	0.0300685	0.00592135	3.81472e-07	1.03053	606	164374
798.1	Chronic fatigue syndrome	symptoms	0.0175793	0.00346518	3.9132e-07	1.01773	1675	162164
458.9	Hypotension NOS	circulatory system	-0.0146798	0.00289444	3.9424e-07	0.985427	3301	155503
977	Personal history of allergy to medicinal agents	injuries & poisonings	0.0158945	0.00313473	3.96853e-07	1.01602	2109	158567
480.3	Pneumonia due to fungus (mycoses)	respiratory	-0.0638542	0.0126122	4.12926e-07	0.938142	240	165414
604	Disorders of penis	genitourinary	-0.0348604	0.00688708	4.15509e-07	0.96574	776	164263
227.3	Benign neoplasm of pituitary gland and craniopharyngeal duct (pouch)	neoplasms	0.0224878	0.00446337	4.69704e-07	1.02274	965	164711
766	Neuralgia, neuritis, and radiculitis NOS	symptoms	0.0139742	0.00277535	4.77534e-07	1.01407	2682	159954
451.2	Phlebitis and thrombophlebitis of lower extremities	circulatory system	0.0292315	0.00581431	4.96877e-07	1.02966	583	164777
253.2	Pituitary hypofunction	endocrine/metabolic	0.0302847	0.00604331	5.40712e-07	1.03075	533	165122
795	Other and nonspecific abnormal cytological, histological and immunological findings	symptoms	-0.015883	0.0031719	5.5168e-07	0.984242	2227	162090
646	Other complications of pregnancy NEC	pregnancy complications	0.0100893	0.00201499	5.5257e-07	1.01014	4867	158582
430	Intracranial hemorrhage	circulatory system	-0.0207565	0.00414985	5.6808e-07	0.979457	1712	163278
149.3	Cancer of hypopharynx	neoplasms	-0.102942	0.0208108	7.55401e-07	0.90218	124	165746
535.2	Atrophic gastritis	digestive	0.012759	0.00257945	7.55957e-07	1.01284	3162	158279
530.9	Heartburn	digestive	0.0129605	0.0026243	7.86706e-07	1.01304	3007	159976
259	Other endocrine disorders	endocrine/metabolic	0.0205554	0.00416359	7.93607e-07	1.02077	1171	163530
520.2	Disturbances in tooth eruption	digestive	-0.0319601	0.00648889	8.42058e-07	0.968545	698	164817
281.1	Megaloblastic anemia	hematopoietic	0.0201281	0.00409482	8.85479e-07	1.02033	1235	163577
722.8	Postlaminectomy syndrome	musculoskeletal	0.0375924	0.00766602	9.40139e-07	1.03831	322	165221
686.3	Pilonidal cyst	dermatologic	0.0316727	0.0065099	1.14274e-06	1.03218	386	165203
253.7	Other disorders of neurohypophysis	endocrine/metabolic	-0.0767977	0.0157921	1.15594e-06	0.926077	173	165270
153.3	Malignant neoplasm of rectum, rectosigmoid junction, and anus	neoplasms	-0.0237433	0.00488495	1.17086e-06	0.976536	1324	164195
288.2	Elevated white blood cell count	hematopoietic	0.0111063	0.00228784	1.20691e-06	1.01117	4292	153251
350.6	Disturbances of sensation of smell and taste	neurological	-0.0205665	0.00424065	1.23558e-06	0.979644	1676	162604
703.1	Ingrowing nail	dermatologic	0.0295853	0.00611121	1.29087e-06	1.03003	468	164488
627	Menopausal and postmenopausal disorders	genitourinary	-0.0081212	0.0016791	1.32061e-06	0.991912	9684	150698
519.8	Other diseases of respiratory system, NEC	respiratory	0.0156321	0.00324733	1.48061e-06	1.01575	1882	159456
425.8	Other cardiomyopathy	circulatory system	-0.0622794	0.0129675	1.56516e-06	0.93962	209	165444
575	Other biliary tract disease	digestive	-0.0125798	0.0026305	1.73323e-06	0.987499	3866	158571
707.3	Chronic ulcer of unspecified site	dermatologic	0.0274913	0.00575064	1.7481e-06	1.02787	580	164026
401.22	Hypertensive chronic kidney disease	circulatory system	0.00999431	0.00209233	1.78255e-06	1.01004	5729	155748
736.5	Acquired deformities of knee	musculoskeletal	0.0453794	0.00951064	1.82916e-06	1.04642	165	165513
1008	Crushing or internal injury to organs	symptoms	-0.0333798	0.00700052	1.85896e-06	0.967171	626	164323
709	Diffuse diseases of connective tissue	dermatologic	-0.014195	0.00297894	1.88754e-06	0.985905	2812	162161
218.1	Uterine leiomyoma	neoplasms	0.00859115	0.00180828	2.02418e-06	1.00863	5895	156932
452.1	Iatrogenic pulmonary embolism and infarction	circulatory system	0.0601869	0.0126729	2.04162e-06	1.06203	88	165782
340	Migraine	neurological	0.00632268	0.00133266	2.09125e-06	1.00634	12928	148298
200	Myeloproliferative disease	neoplasms	-0.01998	0.00422674	2.27802e-06	0.980218	1731	162614
575.1	Cholangitis	digestive	-0.0583565	0.0123584	2.33536e-06	0.943314	240	165419
722.9	Other and unspecified disc disorder	musculoskeletal	0.0184196	0.0039034	2.37161e-06	1.01859	1423	163070
743.21	Pathologic fracture of vertebrae	musculoskeletal	-0.0394298	0.00836309	2.42021e-06	0.961337	492	164829
218	Benign neoplasm of uterus	neoplasms	0.00849653	0.00180691	2.57311e-06	1.00853	5911	156882
70.2	Viral hepatitis B	infectious diseases	-0.0266758	0.00568358	2.68603e-06	0.973677	986	164395
202	Cancer of other lymphoid, histiocytic tissue	neoplasms	-0.0140359	0.0029932	2.74198e-06	0.986062	3559	161349
415.21	Primary pulmonary hypertension	circulatory system	0.0198562	0.00423494	2.75004e-06	1.02005	1185	163797
750	Digestive congenital anomalies	congenital anomalies	-0.0282514	0.0060317	2.81582e-06	0.972144	795	163663
962	Poisoning by hormones and synthetic substitutes	injuries & poisonings	-0.0174215	0.00372066	2.83565e-06	0.982729	2037	161610
241.1	Nontoxic uninodular goiter	endocrine/metabolic	0.00841599	0.00180254	3.02741e-06	1.00845	7120	156076
871.2	Open wound of finger(s)	injuries & poisonings	-0.0285759	0.00612055	3.02891e-06	0.971829	734	162982
617	Disorders secondary to childbirth, surgery, trauma	genitourinary	-0.0116243	0.00249036	3.04597e-06	0.988443	3190	157828
289	Other diseases of blood and blood-forming organs	hematopoietic	-0.00780701	0.00168963	3.8272e-06	0.992223	9278	148963
345.1	Epilepsy	neurological	-0.0151281	0.00327923	3.96297e-06	0.984986	2338	162399
601.1	Prostatitis	genitourinary	-0.02697	0.00585962	4.17066e-06	0.97339	1241	163418
586.4	Stricture/obstruction of ureter	genitourinary	-0.0168526	0.00368115	4.69251e-06	0.983289	2853	161115
528.12	Oral aphthae	digestive	-0.0530661	0.0115968	4.74085e-06	0.948317	265	164886
751	Genitourinary congenital anomalies	congenital anomalies	-0.0160361	0.00350953	4.89348e-06	0.984092	2232	162133
427.3	Other specified cardiac dysrhythmias	circulatory system	-0.00891143	0.00195209	4.99323e-06	0.991128	7685	147201
276.1	Electrolyte imbalance	endocrine/metabolic	-0.00691537	0.00151578	5.06073e-06	0.993108	12433	141525
10	Tuberculosis	infectious diseases	-0.0370742	0.00812826	5.08745e-06	0.963605	473	165044
796	Elevated prostate specific antigen [PSA]	genitourinary	-0.0129042	0.00283279	5.23103e-06	0.987179	5595	158761
253.4	Anterior pituitary disorders	endocrine/metabolic	0.0558058	0.0122793	5.50097e-06	1.05739	104	165680
531.5	Gastrojejunal ulcer	digestive	0.0425312	0.00939448	5.9754e-06	1.04345	177	165584
158	Neoplasm of unspecified nature of digestive system	neoplasms	-0.0219229	0.00485749	6.38528e-06	0.978316	1335	163450
174	Breast cancer	neoplasms	-0.00783018	0.0017355	6.42925e-06	0.9922	9042	155982
840.3	Joint/ligament sprain	injuries & poisonings	0.0105359	0.00234265	6.8781e-06	1.01059	3797	157846
372	Disorders of conjunctiva	sense organs	-0.0265627	0.00591189	7.01963e-06	0.973787	842	163281
443.9	Peripheral vascular disease, unspecified	circulatory system	0.0107811	0.00241081	7.74957e-06	1.01084	5001	157960
728.71	Contracture of palmar fascia [Dupuytren's disease]	musculoskeletal	-0.0384367	0.00861453	8.1257e-06	0.962293	556	164776
428.2	Heart failure NOS	circulatory system	0.0160259	0.003604	8.71953e-06	1.01616	1757	161804
772.2	Spasm of muscle	symptoms	0.0141353	0.00318526	9.09166e-06	1.01424	1865	160290
175	Acquired absence of breast	neoplasms	0.00633681	0.00142952	9.30036e-06	1.00636	11977	144594
573.9	Abnormal serum enzyme levels	digestive	0.00994878	0.00224657	9.49245e-06	1.01	4503	157232
349	Other and unspecified disorders of the nervous system	neurological	0.0279768	0.00632633	9.76657e-06	1.02837	478	164282
317.11	Alcoholic liver damage	mental disorders	-0.0286754	0.00649501	1.01015e-05	0.971732	795	164695
174.1	Breast cancer [female]	neoplasms	-0.00766689	0.0017395	1.04561e-05	0.992362	8987	156111
747.2	Congenital anomalies of peripheral vascular system	congenital anomalies	-0.031687	0.00718976	1.04694e-05	0.96881	560	164894
961.1	Poisoning/allergy of sulfonamides	injuries & poisonings	0.0306861	0.00697265	1.0779e-05	1.03116	392	164085
362.7	Hereditary retinal dystrophies	sense organs	-0.0429426	0.00978675	1.14485e-05	0.957966	328	165390
53	Herpes zoster	infectious diseases	-0.012605	0.00287682	1.17837e-05	0.987474	3396	159793
429.3	Symptoms involving cardiovascular system	circulatory system	0.00859797	0.0019639	1.19766e-05	1.00864	6768	151015
756	Other congenital musculoskeletal anomalies	congenital anomalies	-0.016575	0.00378719	1.20547e-05	0.983562	1799	161915
290.2	Delirium due to conditions classified elsewhere	mental disorders	-0.04758	0.0109254	1.33066e-05	0.953534	293	164112
652	Malposition and malpresentation of fetus or obstruction	pregnancy complications	0.019291	0.00443481	1.36198e-05	1.01948	821	164170
564.1	Irritable Bowel Syndrome	digestive	-0.00912592	0.00210027	1.39208e-05	0.990916	5866	157204
618.1	Prolapse of vaginal walls	genitourinary	-0.0201875	0.00464616	1.39281e-05	0.980015	1282	163810
452.8	Postphlebitic syndrome	circulatory system	0.0454309	0.0104693	1.42849e-05	1.04648	147	165638
174.11	Malignant neoplasm of female breast	neoplasms	-0.00764518	0.00176616	1.49986e-05	0.992384	8676	156356
300.4	Dysthymic disorder	mental disorders	0.0142811	0.00330235	1.52852e-05	1.01438	1846	162472
495.11	Chronic obstructive asthma with exacerbation	respiratory	0.0511952	0.0118404	1.53388e-05	1.05253	92	165778
655.1	Abnormality in fetal heart rate or rhythm	pregnancy complications	0.0145709	0.00337118	1.54483e-05	1.01468	1385	161863
149.2	Cancer of nasopharynx	neoplasms	-0.0698339	0.0161886	1.60486e-05	0.932549	164	165706
172.1	Melanomas of skin, dx or hx	neoplasms	-0.0118171	0.00274014	1.61347e-05	0.988252	4562	160542
528.11	Stomatitis and mucositis (ulcerative)	digestive	-0.0348004	0.00807207	1.62363e-05	0.965798	492	164708
250.11	Type 1 diabetes with ketoacidosis	endocrine/metabolic	-0.0635079	0.0147429	1.64956e-05	0.938467	142	165545
441	Vascular insufficiency of intestine	circulatory system	-0.0352548	0.00818462	1.65155e-05	0.965359	491	164826
362	Other retinal disorders	sense organs	-0.0100184	0.00232682	1.6653e-05	0.990032	5506	157964
81.11	Acute graft-versus-host disease	infectious diseases	-0.102415	0.0238622	1.77142e-05	0.902655	95	165657
41.1	Staphylococcus infections	infectious diseases	0.0146064	0.00340533	1.79269e-05	1.01471	1831	162263
281.11	Pernicious anemia	hematopoietic	0.0310201	0.00723392	1.80172e-05	1.03151	373	165265
270.33	Amyloidosis	endocrine/metabolic	-0.0346188	0.00808419	1.84983e-05	0.965974	570	165107
364.41	Keratoconus	sense organs	0.0367503	0.00861427	1.98822e-05	1.03743	212	165608
503	Pulmonary congestion and hypostasis	respiratory	0.0113739	0.00268835	2.32853e-05	1.01144	3316	158418
358.1	Myasthenia gravis	neurological	0.0330722	0.00782234	2.35867e-05	1.03363	340	165445
747	Cardiac and circulatory congenital anomalies	congenital anomalies	-0.0095485	0.00226031	2.39564e-05	0.990497	5466	157693
327.5	Parasomnia	neurological	0.0258247	0.00611711	2.42441e-05	1.02616	555	164663
448	Disease of capillaries	circulatory system	-0.0499433	0.0118905	2.66599e-05	0.951283	250	165158
526.5	Inflammatory conditions of jaw	digestive	-0.0478529	0.0114239	2.80368e-05	0.953274	276	165283
560.1	Paralytic ileus	digestive	-0.0259851	0.0062169	2.9182e-05	0.97435	799	163049
612.2	Hypertrophy of breast (Gynecomastia)	genitourinary	0.0170471	0.00410118	3.22992e-05	1.01719	1114	163279
519.9	Symptoms involving respiratory system and other chest symptoms	respiratory	-0.014574	0.00351566	3.39142e-05	0.985532	2176	160579
602	Other disorders of prostate	genitourinary	-0.0258845	0.00624565	3.40684e-05	0.974448	1159	163380
705.8	Hyperhidrosis	dermatologic	-0.0144727	0.00350678	3.67427e-05	0.985632	2033	160939
241.2	Nontoxic multinodular goiter	endocrine/metabolic	0.00938518	0.00227764	3.77938e-05	1.00943	4283	159815
750.2	Lower gastrointestinal congenital anomalies	congenital anomalies	-0.032586	0.00791042	3.79899e-05	0.967939	472	164627
596.5	Functional disorders of bladder	genitourinary	0.0124347	0.00302329	3.90635e-05	1.01251	2482	161665
626.14	Irregular menstrual bleeding	genitourinary	0.0144305	0.00350954	3.92594e-05	1.01454	1357	162789
671	Venous/cerebrovascular complications embolism in pregnancy and the puerperium	pregnancy complications	0.0214107	0.00520722	3.92703e-05	1.02164	578	164501
735.3	Hallux valgus (Bunion)	musculoskeletal	-0.013632	0.00332281	4.08597e-05	0.98646	2174	161626
348.9	Other conditions of brain, NOS	neurological	-0.0138113	0.00336662	4.08827e-05	0.986284	2319	160799
204.1	Lymphoid leukemia	neoplasms	-0.0215345	0.00525368	4.15037e-05	0.978696	1248	164257
81.12	Chronic graft-versus-host disease	infectious diseases	-0.0806983	0.0196993	4.19432e-05	0.922472	117	165695
333	Extrapyramidal disease and abnormal movement disorders	neurological	-0.0150053	0.0036641	4.21747e-05	0.985107	2218	161810
727.5	Rupture of synovium	musculoskeletal	0.0229083	0.00559954	4.2934e-05	1.02317	631	164283
353	Nerve root and plexus disorders	neurological	-0.027151	0.00663841	4.31401e-05	0.973214	622	164594
202.2	Non-Hodgkins lymphoma	neoplasms	-0.0127476	0.0031171	4.32196e-05	0.987333	3282	161849
721.8	Other allied disorders of spine	musculoskeletal	0.0269584	0.00659324	4.33611e-05	1.02733	446	164283
527	Diseases of the salivary glands	digestive	-0.0119011	0.0029283	4.82036e-05	0.988169	3317	160171
285.2	Anemia of chronic disease	hematopoietic	-0.00950696	0.00234023	4.85689e-05	0.990538	4888	157262
275.53	Disorders of phosphorus metabolism	endocrine/metabolic	-0.0157605	0.00388041	4.87441e-05	0.984363	1667	160836
800.4	Fracture of patella	injuries & poisonings	-0.041005	0.0101029	4.93364e-05	0.959824	308	165367
579.8	Nonspecific abnormal findings in stool contents	digestive	-0.0155302	0.00382673	4.94184e-05	0.98459	1813	161180
292.2	Mild cognitive impairment	mental disorders	-0.0251976	0.00621308	5.00134e-05	0.975117	893	163711
313.3	Autism	mental disorders	0.0342879	0.00846539	5.11384e-05	1.03488	242	165545
425.11	Hypertrophic obstructive cardiomyopathy	circulatory system	0.0252805	0.00626911	5.51741e-05	1.0256	556	165111
348.7	Coma	neurological	-0.0330202	0.00819643	5.61084e-05	0.967519	401	163703
524	Dentofacial anomalies, including malocclusion	digestive	-0.0391468	0.00973141	5.75276e-05	0.96161	306	165099
264	Lack of normal physiological development	endocrine/metabolic	-0.0598945	0.0149553	6.2046e-05	0.941864	152	165510
429.1	Heart transplant/surgery	circulatory system	-0.0175037	0.00437559	6.32613e-05	0.982649	1595	162924
681.3	Cellulitis and abscess of arm/hand	dermatologic	0.0198032	0.00495553	6.43726e-05	1.02	741	163584
411.8	Other chronic ischemic heart disease, unspecified	circulatory system	0.0125666	0.00314668	6.50794e-05	1.01265	3156	160973
830	Dislocation	injuries & poisonings	0.0106806	0.00268089	6.77729e-05	1.01074	3005	160514
743.4	Stress fracture	musculoskeletal	-0.0208051	0.00524248	7.23087e-05	0.97941	948	164196
426.91	Cardiac pacemaker in situ	circulatory system	0.0109994	0.00277773	7.49929e-05	1.01106	3952	160486
724.8	Other symptoms referable to back	musculoskeletal	0.0171083	0.00432073	7.50774e-05	1.01726	1000	162958
568.1	Peritoneal adhesions (postoperative) (postinfection)	digestive	0.023723	0.00602031	8.13152e-05	1.02401	519	163738
153	Colorectal cancer	neoplasms	-0.0124882	0.00318045	8.61792e-05	0.987589	3008	162128
395.2	Nonrheumatic aortic valve disorders	circulatory system	0.00799317	0.00203727	8.72815e-05	1.00803	8355	154792
394.7	Disease of tricuspid valve	circulatory system	-0.0172417	0.00439944	8.88967e-05	0.982906	1585	163007
578.9	Hemorrhage of gastrointestinal tract	digestive	-0.0130668	0.00334197	9.23268e-05	0.987018	2598	161074
303.3	Psychogenic disorder	mental disorders	-0.0244676	0.00626211	9.33543e-05	0.975829	708	163705
961	Poisoning by other anti-infectives	injuries & poisonings	0.0251642	0.00644251	9.38529e-05	1.02548	475	163696
473.3	Paralysis/spasm of vocal cords or larynx	respiratory	-0.0227006	0.0058189	9.57241e-05	0.977555	897	164554
714.1	Rheumatoid arthritis	musculoskeletal	0.0109421	0.00280511	9.58883e-05	1.011	2835	162228
275.1	Disorders of iron metabolism	hematopoietic	-0.0276804	0.00710681	9.82372e-05	0.972699	646	164895
601.4	Balanoposthitis	genitourinary	0.0579725	0.0148848	9.83027e-05	1.05969	85	165602
681.6	Cellulitis and abscess of foot, toe	dermatologic	0.0333043	0.00855673	9.93504e-05	1.03387	256	165210
386	Vertiginous syndromes and other disorders of vestibular system	sense organs	0.00544204	0.00139987	0.000101271	1.00546	13038	142984
427.5	Arrhythmia (cardiac) NOS	circulatory system	0.00983391	0.00253231	0.000103018	1.00988	3864	154087
262	Mineral deficiency NEC	endocrine/metabolic	0.016841	0.00434007	0.000104302	1.01698	1060	163899
715.1	Sacroiliitis NEC	musculoskeletal	0.0205643	0.00531002	0.000107616	1.02078	658	164566
290.12	Dementia with cerebral degenerations	mental disorders	-0.0694544	0.0179391	0.000108092	0.932903	158	165604
224.1	Benign neoplasm of eye, uveal	neoplasms	-0.0250812	0.00649067	0.000111457	0.975231	760	164854
281.12	Other vitamin B12 deficiency anemia	hematopoietic	0.0187321	0.00484989	0.00011229	1.01891	867	164221
427.1	Paroxysmal tachycardia, unspecified	circulatory system	0.0066662	0.00172772	0.000114138	1.00669	9289	152752
250.12	Type 1 diabetes with renal manifestations	endocrine/metabolic	-0.0290625	0.00753309	0.00011433	0.971356	496	165110
724	Other and unspecified disorders of back	musculoskeletal	0.0124314	0.00322922	0.000118275	1.01251	1957	160514
749	Congenital anomalies of face and neck	congenital anomalies	-0.0336053	0.00873171	0.000118771	0.966953	388	164971
145.5	Cancer of the mouth floor	neoplasms	-0.0878371	0.0228379	0.000120005	0.91591	97	165773
360.2	Progressive myopia	sense organs	-0.0508026	0.0132153	0.00012094	0.950466	187	165521
972.6	Antihypertensive agents causing adverse effects	injuries & poisonings	0.0531636	0.0138447	0.000123037	1.0546	94	165407
610.4	Benign neoplasm of breast	genitourinary	-0.0176456	0.00460653	0.000127847	0.982509	1103	163097
851	Complications of transplants and reattached limbs	injuries & poisonings	-0.0190642	0.00500148	0.000138007	0.981116	1024	163338
960	Poisoning by antibiotics	injuries & poisonings	0.0110343	0.002897	0.000139591	1.0111	2465	158076
656.6	Perinatal disorders of digestive system	pregnancy complications	-0.162306	0.0427523	0.000146792	0.850181	33	165837
214	Lipoma	neoplasms	0.0113419	0.00299338	0.000151264	1.01141	2464	160952
300.11	Generalized anxiety disorder	mental disorders	0.00559193	0.00147647	0.000152255	1.00561	10602	149813
530.6	Diverticulum of esophagus, acquired	digestive	-0.0598323	0.0158004	0.000152623	0.941922	164	165706
653	Problems associated with amniotic cavity and membranes	pregnancy complications	0.0112998	0.00299975	0.000165272	1.01136	1923	161049
962.3	Hormones and synthetic substitutes causing adverse effects in therapeutic use	injuries & poisonings	-0.0148346	0.00394187	0.000167662	0.985275	1791	162129
358	Myoneural disorders	neurological	0.0275216	0.00731713	0.00016906	1.0279	399	165317
279.7	Other immunological findings	endocrine/metabolic	-0.00914202	0.00243104	0.00016955	0.9909	3989	158193
196	Radiotherapy	neoplasms	-0.0652178	0.0173784	0.000174856	0.936863	139	165301
433.31	Transient cerebral ischemia	circulatory system	0.00803218	0.00214461	0.000180188	1.00806	5775	157370
911	Blister	injuries & poisonings	0.0429968	0.0114955	0.000183799	1.04393	115	165255
204.11	Lymphoid leukemia, acute	neoplasms	-0.041584	0.0111918	0.00020273	0.959269	280	165395
613.1	Inflammatory disease of breast	genitourinary	0.0260122	0.00700706	0.000205404	1.02635	319	164654
798	Malaise and fatigue	symptoms	0.00377357	0.00101858	0.000211609	1.00378	28857	117774
723.1	Torticollis	musculoskeletal	-0.0572706	0.0154815	0.000216191	0.944338	138	165271
389.2	Conductive hearing loss	sense organs	-0.0190154	0.00514063	0.000216415	0.981164	1066	163539
612	Breast conditions, congenital or relating to hormones	genitourinary	0.0132319	0.00357966	0.000218678	1.01332	1451	162478
535	Gastritis and duodenitis	digestive	0.00677847	0.00183832	0.000226631	1.0068	6919	152312
871.4	Open wound of toe(s)	injuries & poisonings	0.0395732	0.0107429	0.000229916	1.04037	126	165366
709.7	Unspecified diffuse connective tissue disease	dermatologic	-0.0195247	0.00531846	0.000241496	0.980665	860	164585
276.11	Hyperosmolality and/or hypernatremia	endocrine/metabolic	-0.026947	0.00735187	0.00024702	0.973413	528	163077
735.23	Hallux rigidus	musculoskeletal	-0.0279112	0.00764892	0.000263228	0.972475	497	164904
443.8	Other specified peripheral vascular diseases	circulatory system	-0.0411043	0.0113005	0.000275403	0.959729	255	165342
301	Personality disorders	mental disorders	0.0212594	0.00585719	0.000283824	1.02149	521	164753
1007	Injury to blood vessels	symptoms	-0.0422928	0.0116691	0.000289713	0.958589	251	165385
870.1	Open wound or laceration of eye or eyelid	injuries & poisonings	-0.0707108	0.0195172	0.000291215	0.931731	87	165461
714	Rheumatoid arthritis and other inflammatory polyarthropathies	musculoskeletal	0.00911991	0.00251903	0.000294136	1.00916	3525	161097
1001	Foreign body injury	symptoms	-0.0167821	0.0046428	0.000300766	0.983358	1284	162122
131	Protozoan infection	infectious diseases	0.0147761	0.00408947	0.000302445	1.01489	764	164245
285.22	Anemia in neoplastic disease	hematopoietic	-0.0187314	0.00518839	0.000305908	0.981443	1103	163434
871.3	Open wound of foot except toe(s) alone	injuries & poisonings	0.02373	0.00659236	0.000318692	1.02401	428	164780
367.8	Hypermetropia	sense organs	-0.0115837	0.00322455	0.000327722	0.988483	2507	161000
689	Disorder of skin and subcutaneous tissue NOS	dermatologic	-0.00935842	0.00260965	0.000335682	0.990685	3940	153269
172.11	Melanomas of skin	neoplasms	-0.0100567	0.00281861	0.000359782	0.989994	4245	160956
427.9	Palpitations	circulatory system	0.00447436	0.00125474	0.000362517	1.00448	16571	140439
475.9	Postnasal drip	respiratory	0.00995648	0.00280891	0.000393201	1.01001	2927	158329
981	Toxic effect of (non-ethyl) alcohol and petroleum and other solvents	injuries & poisonings	-0.0704085	0.0198696	0.000394819	0.932013	88	165782
859	Complication due to other implant and internal device	injuries & poisonings	-0.0163076	0.00460221	0.000394967	0.983825	1229	162849
747.11	Cardiac shunt/ heart septal defect	congenital anomalies	-0.012876	0.00363841	0.000401771	0.987207	2054	163176
525.1	Loss of teeth or edentulism	digestive	-0.0315807	0.00892775	0.000404143	0.968913	404	165070
379.2	Disorders of vitreous body	sense organs	-0.00907384	0.00256559	0.000405095	0.990967	4542	159127
800.2	Fracture of unspecified part of femur	injuries & poisonings	-0.0268324	0.00758797	0.000405955	0.973524	524	165085
619.4	Noninflammatory disorders of vagina	genitourinary	-0.0079824	0.00225922	0.00041048	0.992049	3840	156292
345.12	Partial epilepsy	neurological	-0.0133272	0.00377246	0.000411253	0.986761	1745	163329
199.4	Neurofibromatosis	neoplasms	-0.0504334	0.0142848	0.000414668	0.950817	156	165674
962.1	Adrenal cortical steroids causing adverse effects in therapeutic use	injuries & poisonings	-0.0306443	0.00869824	0.000426616	0.96982	393	165123
618	Genital prolapse	genitourinary	-0.0122518	0.00349198	0.00045055	0.987823	2131	162381
519.1	Tracheostomy complications	respiratory	-0.0526299	0.0150024	0.000451327	0.948731	157	165541
516	Abnormal sputum	respiratory	-0.0172526	0.00492172	0.000455941	0.982895	1123	163488
275.5	Disorders of calcium/phosphorus metabolism	endocrine/metabolic	-0.00933704	0.00266711	0.000463844	0.990706	3534	157477
41.8	H. pylori	infectious diseases	0.0158753	0.00453589	0.000465365	1.016	937	163989
701	Other hypertrophic and atrophic conditions of skin	dermatologic	-0.00631981	0.0018068	0.000469139	0.9937	8436	147052
564	Functional digestive disorders	digestive	-0.00513999	0.00147051	0.000473404	0.994873	12355	144625
270.3	Disorders of plasma protein metabolism	endocrine/metabolic	-0.012776	0.00365531	0.000473719	0.987305	2316	162208
524.3	Anomalies of tooth position/malocclusion	digestive	-0.0352665	0.0101092	0.000485649	0.965348	277	165170
526.41	Temporomandibular joint disorder, unspecified	digestive	-0.0191549	0.00549709	0.000492948	0.981027	865	163785
665	Obstetrical/birth trauma	pregnancy complications	-0.0126779	0.00363926	0.000494611	0.987402	1791	161235
516.1	Hemoptysis	respiratory	-0.0177094	0.00508439	0.00049567	0.982447	1054	163681
514.1	Abnormal results of function study of pulmonary system	respiratory	0.0186846	0.00539068	0.000528082	1.01886	696	164495
958.2	Traumatic and surgical subcutaneous emphysema	injuries & poisonings	-0.0684076	0.0197505	0.00053303	0.93388	95	165222
255.12	Hyperaldosteronism	endocrine/metabolic	0.0240381	0.0069571	0.000549902	1.02433	385	165387
374	Other disorders of eyelids	sense organs	-0.0106417	0.00309197	0.000578037	0.989415	2990	160190
457.2	Encounter for long-term (current) use of antiplatelets/antithrombotics	circulatory system	0.0174144	0.00507162	0.000595425	1.01757	1017	162602
750.22	Congenital anomaly of gallbladder, bile ducts, liver, pancreas	congenital anomalies	-0.0368438	0.0107327	0.000597241	0.963827	262	165371
350.2	Abnormality of gait	neurological	0.00841767	0.00245406	0.000603359	1.00845	4414	156555
315	Develomental delays and disorders	mental disorders	-0.0202597	0.005923	0.00062503	0.979944	722	163147
475	Chronic sinusitis	respiratory	0.00506252	0.00148033	0.000626516	1.00508	11453	145985
756.22	Pectus carinatum	congenital anomalies	-0.21377	0.0626063	0.000638956	0.807534	22	165848
229	Benign neoplasm of unspecified sites	neoplasms	0.0174694	0.00512086	0.000646245	1.01762	809	164100
578	Gastrointestinal hemorrhage	digestive	-0.00583146	0.0017109	0.000653408	0.994186	8911	150809
378.1	Strabismus (not specified as paralytic)	sense organs	-0.0227117	0.00666788	0.000658899	0.977544	659	164712
578.1	Hematemesis	digestive	-0.0240271	0.00706118	0.000667221	0.976259	504	164682
599.1	Urinary obstruction	genitourinary	-0.0320256	0.00942722	0.000680946	0.968482	442	164523
601.8	Other inflammatory disorders of male genital organs	genitourinary	0.0439963	0.0129561	0.000684304	1.04498	108	165545
334.1	Spinocerebellar disease	neurological	-0.0644911	0.0191107	0.000739196	0.937544	107	165678
379	Other disorders of eye	sense organs	-0.00732773	0.00217739	0.000764427	0.992699	5956	155653
245.2	Chronic thyroiditis	endocrine/metabolic	0.0103145	0.0030714	0.000784411	1.01037	2330	162152
599.8	Other symptoms involving urinary system	genitourinary	-0.012014	0.00358012	0.000791499	0.988058	2085	160367
204	Leukemia	neoplasms	-0.0103811	0.00309699	0.000802338	0.989673	3293	161922
569.2	Gastrointestinal complications	digestive	-0.019058	0.00568973	0.000809447	0.981122	878	163703
386.9	Dizziness and giddiness (Light-headedness and vertigo)	sense organs	0.00435332	0.00130174	0.000825093	1.00436	15433	138062
526.9	Jaw disease NOS	digestive	-0.0362801	0.0108578	0.000833655	0.96437	261	165346
360	Disorders of the globe	sense organs	-0.0366265	0.0110079	0.000876946	0.964036	245	165400
201	Hodgkin's disease	neoplasms	-0.0195143	0.00588938	0.000921432	0.980675	811	164840
602.3	Dysplasia of prostate	genitourinary	-0.0351297	0.0106546	0.000976729	0.96548	400	164997
370	Keratitis	sense organs	-0.0189608	0.00575998	0.000995438	0.981218	794	164373
334.2	Anterior horn cell disease	neurological	-0.0523087	0.0159033	0.00100482	0.949036	158	165638
803.21	Colles' fracture	injuries & poisonings	-0.052402	0.0159678	0.00103174	0.948947	139	165657
442.4	Arterial dissection	circulatory system	-0.0340082	0.0103639	0.0010329	0.966564	288	165381
561.1	Diarrhea	digestive	-0.00477088	0.00145392	0.00103295	0.99524	12055	143253
327.4	Insomnia	neurological	0.00490063	0.00149428	0.00103955	1.00491	11018	146063
732	Osteochondropathies	musculoskeletal	0.0250932	0.00765666	0.00104806	1.02541	298	165266
627.5	Premature menopause and other ovarian failure	genitourinary	-0.0183688	0.00565002	0.00114956	0.981799	743	164378
529	Diseases and other conditions of the tongue	digestive	-0.017701	0.00544955	0.00116155	0.982455	998	163679
303	Psychogenic and somatoform disorders	mental disorders	-0.0154525	0.00475742	0.00116183	0.984666	1091	162970
593.2	Microscopic hematuria	genitourinary	-0.00866724	0.00267403	0.00119003	0.99137	3845	159337
479	Other upper respiratory disease	respiratory	0.00517028	0.00159565	0.00119433	1.00518	9368	145292
41	Bacterial infection NOS	infectious diseases	0.00520613	0.00160768	0.00120245	1.00522	8511	148041
755.1	Congenital deformities of feet	congenital anomalies	0.0252627	0.007808	0.00121435	1.02558	264	165226
224	Benign neoplasm of eye	neoplasms	-0.0194338	0.00601254	0.00122839	0.980754	847	164688
145.4	Cancer of the gums	neoplasms	-0.0659259	0.020434	0.00125406	0.9362	112	165758
747.1	Cardiac congenital anomalies	congenital anomalies	-0.00784331	0.00243814	0.00129572	0.992187	4712	158800
343	Infantile cerebral palsy	neurological	-0.0435784	0.0136742	0.00143808	0.957358	173	165655
8.7	Intestinal infection due to protozoa	infectious diseases	-0.0509328	0.0159837	0.00143984	0.950343	143	165727
735.2	Acquired toe deformities	musculoskeletal	-0.0119377	0.0037535	0.00147064	0.988133	1806	162504
289.1	Myelofibrosis	hematopoietic	-0.0540372	0.0170642	0.00154175	0.947397	140	165685
377	Disorders of optic nerve and visual pathways	sense organs	0.00995277	0.00314379	0.00154631	1.01	2201	162851
790.9	Abnormal arterial blood gases	symptoms	0.0575434	0.0182136	0.00158112	1.05923	47	165651
613.9	Breast disorder NOS	genitourinary	-0.0213049	0.00675241	0.00160412	0.97892	556	164436
560.3	Peritoneal or intestinal adhesions	digestive	-0.0379858	0.0120483	0.00161717	0.962727	204	165387
588.1	Renal osteodystrophy	genitourinary	-0.0290189	0.00921151	0.00163113	0.971398	292	165129
624.9	stress incontinence, female	genitourinary	0.010276	0.00326397	0.00164212	1.01033	2151	161742
597	Other disorders of urethra and urinary tract	genitourinary	-0.016269	0.00518084	0.00168823	0.983863	1096	163550
353.1	Nerve plexus lesions	neurological	-0.0245867	0.00785271	0.00174222	0.975713	443	165061
967	Adverse effects of sedatives or other central nervous system depressants and anesthetics	injuries & poisonings	0.032449	0.010375	0.0017623	1.03298	152	165184
276.41	Acidosis	endocrine/metabolic	-0.0101104	0.00323299	0.0017644	0.989941	2344	158637
528.5	Diseases of lips	digestive	-0.0233489	0.00746762	0.00176787	0.976922	505	164324
842	Other sprains and strains	injuries & poisonings	0.0170722	0.00546357	0.00177971	1.01722	642	163541
530.2	Esophageal bleeding (varices/hemorrhage)	digestive	-0.0111378	0.00356652	0.00179093	0.988924	2216	161521
356	Hereditary and idiopathic peripheral neuropathy	neurological	0.0115608	0.00370221	0.00179209	1.01163	1831	162104
295.1	Schizophrenia	mental disorders	0.0164924	0.00528218	0.00179462	1.01663	585	165085
191.11	Cancer of brain	neoplasms	-0.0175675	0.00564594	0.0018612	0.982586	941	164562
695.41	Cutaneous lupus erythematosus	dermatologic	-0.018395	0.00595737	0.0020166	0.981773	605	165058
994.1	Systemic inflammatory response syndrome (SIRS)	injuries & poisonings	-0.0290679	0.00941646	0.0020224	0.971351	290	163993
443.7	Peripheral angiopathy in diseases classified elsewhere	circulatory system	0.047329	0.015339	0.0020318	1.04847	73	165797
1009	Injury, NOS	symptoms	0.00371958	0.00121702	0.00224077	1.00373	16596	136957
472	Chronic pharyngitis and nasopharyngitis	respiratory	0.00648174	0.00212279	0.00226264	1.0065	5186	156102
522.5	Periapical abscess	digestive	0.0190708	0.00624593	0.00226333	1.01925	414	164359
275.6	Hypercalcemia	endocrine/metabolic	-0.00956587	0.0031367	0.00229097	0.99048	2588	161579
430.3	Subdural hemorrhage	circulatory system	-0.0233296	0.00768861	0.0024109	0.97694	546	164961
444	Arterial embolism and thrombosis	circulatory system	-0.0130675	0.00431246	0.00244424	0.987018	1459	162484
362.6	Peripheral retinal degenerations	sense organs	-0.0212039	0.00701287	0.00249814	0.979019	550	164965
362.31	Separation of retinal layers	sense organs	-0.0408713	0.0135215	0.0025054	0.959953	195	165597
286.11	Von willebrand's disease	hematopoietic	-0.0347491	0.0115256	0.00257014	0.965848	232	165574
258	Iatrogenic endocrine disorders	endocrine/metabolic	-0.0281024	0.00932689	0.00258638	0.972289	351	165156
271.9	Other disorders of carbohydrate transport and metabolism	endocrine/metabolic	-0.044091	0.0146525	0.00262013	0.956867	138	165618
110.11	Dermatophytosis of nail	infectious diseases	0.00822044	0.00273681	0.00266757	1.00825	3152	159380
368.4	Visual field defects	sense organs	0.0143078	0.00478051	0.00276298	1.01441	927	164293
433.3	Cerebral ischemia	circulatory system	0.00622619	0.0020808	0.00276962	1.00625	6237	156511
912	Insect bite	injuries & poisonings	-0.0225628	0.00756748	0.0028679	0.97769	508	163136
974	Poisoning by water, mineral, and uric acid metabolism drugs	injuries & poisonings	0.0421061	0.0141269	0.00287719	1.04301	78	165792
251.1	Hypoglycemia	endocrine/metabolic	-0.0145531	0.00488463	0.00288841	0.985552	1006	163350
285.8	Hemoglobinuria	hematopoietic	-0.0519177	0.0174306	0.00289623	0.949407	108	165762
531.3	Duodenal ulcer	digestive	-0.0202181	0.00679751	0.00293627	0.979985	651	164646
817	Concussion	injuries & poisonings	-0.0121367	0.00408168	0.00294456	0.987937	1476	162722
710.11	Acute osteomyelitis	musculoskeletal	0.0174156	0.00587642	0.00304024	1.01757	614	164888
509.2	Respiratory insufficiency	respiratory	0.0207486	0.00701742	0.00310926	1.02097	398	164153
724.2	Disorders of coccyx	musculoskeletal	-0.0573439	0.0194158	0.00314222	0.944269	91	165594
245.21	Chronic lymphocytic thyroiditis	endocrine/metabolic	0.0092563	0.00313618	0.00316278	1.0093	2252	162435
620	Dysplasia of female genital organs	genitourinary	-0.0240684	0.0081654	0.00320243	0.976219	350	165024
345.11	Generalized convulsive epilepsy	neurological	-0.0205308	0.00697288	0.00323606	0.979679	523	164910
571.51	Cirrhosis of liver without mention of alcohol	digestive	0.00857181	0.00291139	0.00323755	1.00861	3030	162074
801.1	Fracture of foot	injuries & poisonings	0.0182953	0.00621742	0.00325482	1.01846	501	164854
752.11	Spina bifida	congenital anomalies	0.0278719	0.00952291	0.0034244	1.02826	172	165608
290.16	Vascular dementia	mental disorders	-0.0397879	0.0136016	0.00344188	0.960993	205	165433
502	Postinflammatory pulmonary fibrosis	respiratory	-0.0109568	0.00374739	0.00345744	0.989103	2135	161321
370.3	Keratoconjunctivitis	sense organs	-0.027279	0.0093418	0.00349913	0.97309	333	165177
520.1	Hereditary disturbances in tooth structure	digestive	-0.056878	0.0194989	0.00353435	0.944709	89	165781
251	Other disorders of pancreatic internal secretion	endocrine/metabolic	-0.0143915	0.00493925	0.00357173	0.985712	1002	163491
297	Suicidal ideation or attempt	mental disorders	0.0151826	0.00521724	0.00361338	1.0153	640	164256
300.8	Acute reaction to stress	mental disorders	0.0147993	0.00509353	0.00366664	1.01491	698	163688
279.11	Deficiency of humoral immunity	endocrine/metabolic	-0.015009	0.0051695	0.00369165	0.985103	1123	164188
994.21	Septic shock	injuries & poisonings	-0.0208501	0.0071897	0.0037316	0.979366	540	163600
972	Poisoning by agents primarily affecting the cardiovascular system	injuries & poisonings	0.0305044	0.0105227	0.00374457	1.03097	214	165088
379.3	Aphakia and other disorders of lens	sense organs	-0.0433429	0.0149523	0.00374662	0.957583	150	165720
651	Multiple gestation	pregnancy complications	0.0138105	0.00477338	0.00381292	1.01391	742	163936
964	Poisoning by agents primarily affecting blood constituents	injuries & poisonings	0.0296815	0.0102779	0.00387833	1.03013	180	165112
695.2	Bullous dermatoses	dermatologic	0.0268966	0.00931634	0.00388888	1.02726	281	165381
801	Fracture of ankle and foot	injuries & poisonings	0.00742372	0.00257189	0.0038957	1.00745	3151	160831
564.9	Personal history of diseases of digestive system	digestive	0.00762293	0.00264447	0.00394422	1.00765	3355	157885
803.1	Fracture of humerus	injuries & poisonings	-0.0138981	0.00482337	0.00395904	0.986198	1178	164273
585.2	Renal failure NOS	genitourinary	-0.0153585	0.00533122	0.0039659	0.984759	906	163721
191	Manlignant and unknown neoplasms of brain and nervous system	neoplasms	-0.0126722	0.00440227	0.00399485	0.987408	1470	163817
964.1	Anticoagulants causing adverse effects	injuries & poisonings	0.0302405	0.0105055	0.00399505	1.0307	173	165143
595	Hydronephrosis	genitourinary	-0.00933855	0.00324474	0.00400133	0.990705	2526	162044
751.1	Congenital anomalies of genital organs	congenital anomalies	-0.0210025	0.00729883	0.00400818	0.979217	503	164965
441.2	Chronic vascular insufficiency of intestine	circulatory system	-0.0533012	0.0185881	0.00413745	0.948094	108	165556
202.21	Nodular lymphoma	neoplasms	-0.0192693	0.00674085	0.00425527	0.980915	737	164960
430.2	Intracerebral hemorrhage	circulatory system	-0.0173814	0.00609524	0.00434948	0.982769	764	164558
270	Disorders of protein plasma/amino-acid transport and metabolism	endocrine/metabolic	-0.00943219	0.00331304	0.00441346	0.990612	2721	161406
386.2	Peripheral or central vertigo	sense organs	0.0102983	0.00361839	0.00442567	1.01035	1821	161294
480.11	Pneumococcal pneumonia	respiratory	-0.0203936	0.00716775	0.00443857	0.979813	545	164106
367.4	Presbyopia	sense organs	-0.00578514	0.0020422	0.00461435	0.994232	6493	154833
522	Diseases of pulp and periapical tissues	digestive	0.0173108	0.00611695	0.00465511	1.01746	444	164251
637	Short gestation; low birth weight; and fetal growth retardation	pregnancy complications	-0.0255324	0.00905606	0.00481176	0.974791	269	165417
275	Disorders of mineral metabolism	endocrine/metabolic	-0.00464429	0.00165841	0.00510332	0.995366	9577	147413
174.3	Neoplasm of uncertain behavior of breast	neoplasms	-0.0389921	0.0139365	0.00514465	0.961758	153	165567
609.2	Abnormal spermatozoa	genitourinary	-0.0398125	0.0142566	0.00522922	0.96097	213	165434
283.2	Non-autoimmune hemolytic anemias	hematopoietic	-0.0582292	0.0208618	0.00525137	0.943434	81	165698
571.6	Primary biliary cirrhosis	digestive	-0.0309017	0.0111047	0.00539015	0.969571	249	165509
751.21	Cystic kidney disease	congenital anomalies	-0.0134628	0.00485632	0.00556745	0.986627	1196	163957
960.2	Allergy/adverse effect of penicillin	injuries & poisonings	0.00938892	0.00338844	0.00559074	1.00943	1755	160969
252	Disorders of parathyroid gland	endocrine/metabolic	0.00783823	0.00283234	0.00565054	1.00787	2865	161956
364.1	Corneal opacity	sense organs	-0.0280638	0.0101536	0.00571084	0.972326	281	165327
599.5	Frequency of urination and polyuria	genitourinary	0.00434794	0.00157837	0.00587455	1.00436	10884	145762
159.3	Malignant neoplasm of gallbladder and extrahepatic bile ducts	neoplasms	-0.0384984	0.0139899	0.00592572	0.962233	191	165576
333.8	Other degenerative diseases of the basal ganglia	neurological	-0.0414894	0.0150875	0.00596104	0.959359	152	165718
270.38	Other specified disorders of plasma protein metabolism	endocrine/metabolic	-0.0219896	0.00801426	0.00607311	0.97825	441	164500
615	Endometriosis	genitourinary	0.0067997	0.00248317	0.00617561	1.00682	3120	160737
465.2	Acute pharyngitis	respiratory	0.00527406	0.00193002	0.0062828	1.00529	5637	150972
727.7	Contracture of tendon (sheath)	musculoskeletal	0.0318998	0.011684	0.00632938	1.03241	114	165555
536.8	Dyspepsia and other specified disorders of function of stomach	digestive	-0.0121459	0.00446871	0.00656796	0.987928	1232	162159
781.1	Loss of height	symptoms	-0.037527	0.0138094	0.00657763	0.963168	191	165311
170.1	Bone cancer	neoplasms	-0.0183384	0.0067558	0.00663824	0.981829	670	164845
528.6	Leukoplakia of oral mucosa	digestive	-0.0288959	0.0106455	0.00664016	0.971518	304	165343
290.3	Other persistent mental disorders due to conditions classified elsewhere	mental disorders	-0.0329802	0.012152	0.00664803	0.967558	195	165218
752	Nervous system congenital anomalies	congenital anomalies	0.0140412	0.00517927	0.00670736	1.01414	722	164754
220	Benign neoplasm of ovary	neoplasms	0.015961	0.00589815	0.0068079	1.01609	495	164877
389.5	Disorders of acoustic nerve	sense organs	-0.0390424	0.014449	0.00689068	0.96171	172	164910
592.2	Urethritis and urethral syndrome	genitourinary	-0.0253903	0.00940069	0.00691522	0.974929	349	164953
695.42	Systemic lupus erythematosus	dermatologic	-0.0100297	0.00372306	0.00706117	0.99002	1527	164050
283	Acquired hemolytic anemias	hematopoietic	-0.0294929	0.0109494	0.00706921	0.970938	246	165402
350.3	Lack of coordination	neurological	-0.0167556	0.00624404	0.00728643	0.983384	768	164012
364.9	Cornea replaced by transplant	sense organs	0.0336357	0.0125479	0.00734909	1.03421	131	165703
710.1	Osteomyelitis	musculoskeletal	0.0107312	0.0040059	0.00738767	1.01079	1433	163597
751.3	Obstructive genitourinary defect	congenital anomalies	-0.0501905	0.0187998	0.00759097	0.951048	94	165671
362.26	Macular puckering of retina	sense organs	-0.0163472	0.00612374	0.00759688	0.983786	887	164641
755.3	Congenital anomaly of fingers/toes	congenital anomalies	-0.0406986	0.0152668	0.00768005	0.960118	124	165746
70.9	Hepatitis NOS	infectious diseases	-0.0137915	0.00517612	0.00771131	0.986303	1068	163648
983	Toxic effect of corrosive aromatics, acids, and caustic alkalis	injuries & poisonings	0.046482	0.0174845	0.00784963	1.04758	39	165831
614.54	Abscess or ulceration of vulva	genitourinary	0.0240745	0.00907173	0.00795912	1.02437	173	165294
586.3	Vascular disorders of kidney/hypertrophy	genitourinary	-0.0407659	0.015362	0.00796179	0.960054	130	165506
377.1	Optic atrophy	sense organs	-0.0216857	0.00819141	0.0081121	0.978548	417	165238
994.2	Sepsis	injuries & poisonings	-0.00712759	0.00269534	0.00818345	0.992898	3630	157228
771.2	Cramp of limb	symptoms	0.0159852	0.00608041	0.00856453	1.01611	565	164385
915	Superficial injury without mention of infection	injuries & poisonings	-0.0106494	0.00405201	0.00858456	0.989407	1471	159803
282.5	Sickle cell anemia	hematopoietic	-0.0109474	0.0041661	0.00859532	0.989112	904	164790
578.2	Blood in stool	digestive	-0.00618498	0.00235395	0.0086019	0.993834	4446	157335
250.13	Type 1 diabetes with ophthalmic manifestations	endocrine/metabolic	-0.0212589	0.00809284	0.00861712	0.978965	376	165304
781	Symptoms involving nervous and musculoskeletal systems	symptoms	0.00635688	0.0024236	0.00871838	1.00638	4087	155885
430.1	Subarachnoid hemorrhage	circulatory system	-0.0185039	0.00707117	0.00887551	0.981666	537	164997
695.4	Lupus (localized and systemic)	dermatologic	-0.00922653	0.00352677	0.0088929	0.990816	1710	163847
695.22	Pemphigus and pemphigoid	dermatologic	0.0286504	0.0109544	0.00891174	1.02906	210	165589
191.1	Cancer of brain and nervous system	neoplasms	-0.0135179	0.00516903	0.00891826	0.986573	1081	164331
619	Noninflammatory female genital disorders	genitourinary	-0.00384267	0.00147868	0.0093574	0.996165	10378	146382
728.2	Laxity of ligament or hypermobility syndrome	musculoskeletal	-0.0305342	0.0117907	0.0096064	0.969927	201	165383
347	Cataplexy and narcolepsy	neurological	0.0169782	0.00656641	0.00972075	1.01712	426	165296
721.2	Spondylosis with myelopathy	musculoskeletal	0.0124686	0.00483517	0.0099162	1.01255	1030	164142
738	Other acquired musculoskeletal deformity	musculoskeletal	0.00709334	0.00275169	0.00994282	1.00712	3138	159421
185	Cancer of prostate	neoplasms	-0.00684578	0.00266644	0.0102469	0.993178	6775	158364
378	Strabismus and other disorders of binocular eye movements	sense organs	-0.0107383	0.00418897	0.010363	0.989319	1537	163347
601	Inflammatory diseases of prostate	genitourinary	-0.0115002	0.00448694	0.0103762	0.988566	1841	162204
759	Other and unspecified congenital anomalies	congenital anomalies	-0.0139206	0.00543531	0.010433	0.986176	865	164385
277.6	Other deficiencies of circulating enzymes	endocrine/metabolic	-0.0467326	0.0183707	0.0109633	0.954343	88	165677
341	Other demyelinating diseases of central nervous system	neurological	0.0184378	0.00725508	0.0110422	1.01861	345	165304
573.1	Chronic passive congestion of liver	digestive	-0.034329	0.0135486	0.0112846	0.966254	161	165499
529.6	Glossodynia	digestive	-0.0259615	0.0103043	0.0117525	0.974373	289	165254
395.3	Nonrheumatic tricuspid valve disorders	circulatory system	-0.0129645	0.00515006	0.011824	0.987119	1063	162394
939.1	Contact and allergic dermatitis of eyelid	dermatologic	-0.060763	0.0241849	0.0119901	0.941046	61	165646
389.4	Tinnitus	sense organs	-0.00572365	0.00228129	0.0121091	0.994293	5296	156451
264.1	Short stature	endocrine/metabolic	-0.0547522	0.0218422	0.0121857	0.94672	82	165788
735.22	Claw toe (acquired)	musculoskeletal	-0.214733	0.0857125	0.0122357	0.806757	9	165861
853	Complication of colostomy or enterostomy	injuries & poisonings	-0.0309073	0.0123462	0.0123009	0.969565	191	165434
751.2	Congenital anomalies of urinary system	congenital anomalies	-0.0101256	0.00404725	0.0123549	0.989926	1657	163167
609.1	Infertility, male	genitourinary	0.0152575	0.00614812	0.0130776	1.01537	623	164493
577.1	Acute pancreatitis	digestive	0.00926028	0.00375701	0.013709	1.0093	1605	163520
204.21	Myeloid leukemia, acute	neoplasms	-0.0177141	0.00721455	0.0140753	0.982442	591	164976
374.2	Lagophthalmos	sense organs	-0.0436499	0.017793	0.0141587	0.957289	112	165592
560.2	Impaction of intestine	digestive	-0.0186704	0.00762499	0.0143418	0.981503	399	164905
710	Osteomyelitis, periostitis, and other infections involving bone	musculoskeletal	0.009755	0.00398642	0.0144029	1.0098	1460	163537
495.1	Chronic obstructive asthma	respiratory	0.0266951	0.0109111	0.0144208	1.02705	161	165465
385	Other disorders of middle ear and mastoid	sense organs	-0.0240823	0.00986218	0.014611	0.976205	320	165196
209	Neuroendocrine tumors	neoplasms	0.013328	0.00546137	0.0146702	1.01342	797	164906
292.3	Memory loss	mental disorders	-0.00684845	0.00281224	0.0148823	0.993175	3690	159765
841	Sprains and strains of back and neck	injuries & poisonings	0.0106096	0.00435856	0.0149252	1.01067	1042	162218
352	Disorders of other cranial nerves	neurological	0.0083302	0.00342357	0.0149663	1.00836	1982	162677
694.1	Vitiligo	dermatologic	-0.0193118	0.00793685	0.0149669	0.980874	423	165225
611.11	Mammographic microcalcification	genitourinary	-0.0172581	0.00712073	0.0153657	0.98289	495	164616
370.31	Keratoconjunctivitis sicca	sense organs	-0.0307679	0.012722	0.015586	0.969701	179	165456
300.13	Phobia	mental disorders	0.0153832	0.00636619	0.0156753	1.0155	490	164562
875	Non-healing surgical wound	injuries & poisonings	0.0422918	0.017517	0.015764	1.0432	51	165690
575.6	Cholesterolosis of gallbladder	digestive	-0.0201032	0.00834389	0.0159816	0.980097	409	165073
385.3	Cholesteatoma	sense organs	-0.0293304	0.0121743	0.0159875	0.971096	215	165537
783.1	Postprocedural fever	symptoms	0.0334587	0.0139314	0.0163204	1.03402	88	165168
1015	Effects of other external causes	symptoms	0.00351058	0.00146392	0.016482	1.00352	11540	143714
916	Contusion	injuries & poisonings	0.00583813	0.00243554	0.0165274	1.00586	3670	155090
696.3	Pityriasis	dermatologic	-0.0368202	0.0154096	0.0168746	0.963849	104	165380
1000	Burns	symptoms	0.0168333	0.00704877	0.0169351	1.01698	365	164379
635.2	Antepartum hemorrhage, abruptio placentae, and placenta previa	pregnancy complications	-0.0100924	0.00423168	0.0170805	0.989958	1162	163649
526.8	Exostosis of jaw	digestive	-0.0600905	0.025204	0.0171178	0.941679	49	165821
750.1	Upper gastrointestinal congenital anomalies	congenital anomalies	-0.0234189	0.0098227	0.0171179	0.976853	300	164912
459.1	Hemorrhage NOS	circulatory system	-0.0195842	0.00822019	0.0171981	0.980606	422	164126
717	Polymyalgia Rheumatica	musculoskeletal	0.0156897	0.00658684	0.0172202	1.01581	681	165028
444.1	Arterial embolism and thrombosis of lower extremity artery	circulatory system	-0.0129196	0.00545157	0.0177939	0.987164	929	163583
711.1	Pyogenic arthritis	musculoskeletal	0.0192039	0.00810403	0.0178037	1.01939	316	165278
656.8	Perinatal jaundice	pregnancy complications	-0.120181	0.0507565	0.0178945	0.88676	19	165851
420.3	Endocarditis	circulatory system	-0.0106968	0.00452931	0.0181924	0.98936	1402	163223
739	Contracture of joint	musculoskeletal	-0.0168713	0.00714392	0.018195	0.98327	490	164787
715	Other inflammatory spondylopathies	musculoskeletal	0.00960585	0.00408019	0.0185594	1.00965	1284	163438
930	Allergic reaction to food	injuries & poisonings	0.00754291	0.00321719	0.0190494	1.00757	1819	161630
427.6	Premature beats	circulatory system	0.00469392	0.00200404	0.0191692	1.0047	7000	153217
994	Sepsis and SIRS	injuries & poisonings	-0.00605117	0.00258684	0.0193242	0.993967	3894	156622
334.21	Amyotrophic Lateral Sclerosis	neurological	-0.0433834	0.0185482	0.0193374	0.957544	117	165753
411.9	Other acute and subacute forms of ischemic heart disease	circulatory system	0.0187706	0.00803361	0.0194646	1.01895	347	164270
159.4	Malignant neoplasm of retroperitoneum and peritoneum	neoplasms	-0.0236663	0.0101311	0.0194902	0.976612	287	165384
291.1	Transient mental disorders due to conditions classified elsewhere	mental disorders	0.0302691	0.0129699	0.0196059	1.03073	85	165651
755	Congenital anomalies of limbs	congenital anomalies	0.0127544	0.00547345	0.0197941	1.01284	627	164506
626.8	Infertility, female	genitourinary	-0.00612769	0.00262986	0.0198039	0.993891	3286	161545
8.6	Viral Enteritis	infectious diseases	0.0181732	0.00782459	0.0202023	1.01834	291	164097
276.4	Acid-base balance disorder	endocrine/metabolic	-0.0069792	0.00300965	0.0203983	0.993045	2676	157894
362.27	Drusen (degenerative) of retina	sense organs	-0.0126366	0.00545656	0.0205664	0.987443	1076	164402
789	Nausea and vomiting	symptoms	0.00289021	0.00125062	0.0208312	1.00289	15316	136396
362.2	Degeneration of macula and posterior pole of retina	sense organs	-0.00744191	0.00322663	0.0210883	0.992586	3083	161416
751.11	Congenital anomalies of female genital organs	congenital anomalies	-0.0201316	0.00874014	0.021259	0.98007	313	165335
441.1	Acute vascular insufficiency of intestine	circulatory system	-0.0301669	0.0131004	0.021293	0.970284	189	165457
145.1	Cancer of lip	neoplasms	-0.0700353	0.0305552	0.0219005	0.932361	53	165817
252.1	Hyperparathyroidism	endocrine/metabolic	0.00682804	0.00298641	0.0222324	1.00685	2603	162359
292.1	Aphasia/speech disturbance	mental disorders	-0.00835092	0.00367452	0.0230472	0.991684	1940	161604
38	Septicemia	infectious diseases	-0.00525097	0.00231316	0.0232053	0.994763	4905	155827
540	Appendiceal conditions	digestive	-0.0116793	0.0051609	0.0236334	0.988389	976	164174
155	Cancer of liver and intrahepatic bile duct	neoplasms	-0.0128655	0.00572912	0.024728	0.987217	1012	164486
361	Retinal detachments and defects	sense organs	-0.010253	0.00457003	0.0248619	0.989799	1384	164066
795.8	Abnormal tumor markers	symptoms	-0.0236324	0.010535	0.024883	0.976645	273	165348
480	Pneumonia	respiratory	-0.00381569	0.0017029	0.0250455	0.996192	9426	150310
742	Derangement of joint, non-traumatic	musculoskeletal	0.00498512	0.00222523	0.0250733	1.005	4444	157300
382	Otalgia	sense organs	0.00632875	0.00282861	0.0252597	1.00635	2688	157227
427.61	Supraventricular premature beats	circulatory system	-0.00891801	0.0039859	0.0252607	0.991122	1852	160924
276	Disorders of fluid, electrolyte, and acid-base balance	endocrine/metabolic	-0.00290298	0.00129817	0.0253378	0.997101	17389	133548
295	Schizophrenia and other psychotic disorders	mental disorders	0.0096731	0.00432936	0.0254631	1.00972	967	164002
371.33	Noninfectious dermatoses of eyelid	sense organs	-0.0607993	0.0273475	0.0262013	0.941012	54	165598
732.1	Juvenile osteochondrosis	musculoskeletal	0.0232088	0.0104662	0.0265891	1.02348	161	165569
512.2	Painful respiration	respiratory	-0.00710377	0.00320389	0.0266073	0.992921	2308	160392
286.13	Congenital factor VIII disorder	hematopoietic	-0.0419668	0.0189707	0.0269534	0.958902	94	165776
331	Other cerebral degenerations	neurological	-0.0140516	0.00637982	0.0276289	0.986047	703	164643
242.31	Thyrotoxic exophthalmos	endocrine/metabolic	-0.0467943	0.0212525	0.0276776	0.954284	68	165802
575.7	Other disorders of gallbladder	digestive	0.00945516	0.00430114	0.0279282	1.0095	1158	162666
613	Other nonmalignant breast conditions	genitourinary	-0.00417583	0.00189977	0.0279438	0.995833	6136	154537
567	Peritonitis and retroperitoneal infections	digestive	-0.00947352	0.00431012	0.0279511	0.990571	1405	162969
388	Other disorders of ear	sense organs	-0.00958004	0.00436183	0.0280679	0.990466	1319	161223
509.3	Pulmonary insufficiency or respiratory failure following trauma and surgery	respiratory	-0.028404	0.0129587	0.0283878	0.971996	190	163539
286.12	Congenital deficiency of other clotting factors (including factor VII)	hematopoietic	0.0211789	0.00969323	0.0288947	1.0214	222	165467
385.5	Tympanosclerosis and middle ear disease related to otitis media	sense organs	-0.032294	0.0147884	0.0289814	0.968222	156	165714
253.1	Pituitary hyperfunction	endocrine/metabolic	0.0121205	0.00555439	0.0290989	1.01219	627	164945
614.5	Inflammatory disease of cervix, vagina, and vulva	genitourinary	-0.00438395	0.00201028	0.029201	0.995626	4798	155249
727.4	Ganglion and cyst of synovium, tendon, and bursa	musculoskeletal	-0.00820667	0.00377125	0.0295467	0.991827	1678	162197
614.52	Vaginitis and vulvovaginitis	genitourinary	-0.00488221	0.00224484	0.0296404	0.99513	3696	157613
446.3	Hypersensitivity angiitis	circulatory system	0.0238326	0.0109654	0.0297484	1.02412	162	165708
655	Known or suspected fetal abnormality affecting management of mother	pregnancy complications	0.00398215	0.00183411	0.0299193	1.00399	6456	156387
530.7	Gastroesophageal laceration-hemorrhage syndrome	digestive	-0.031259	0.0144345	0.0303437	0.969225	126	165744
876	Posttraumatic wound infection not elsewhere classified	injuries & poisonings	0.0318286	0.0147001	0.030372	1.03234	81	165561
580.14	Chronic glomerulonephritis, NOS	genitourinary	-0.0236152	0.0109989	0.0317897	0.976661	215	165499
375.2	Epiphora	sense organs	-0.0183457	0.00854674	0.0318321	0.981822	381	164985
610.2	Fibroadenosis of breast	genitourinary	-0.0302629	0.0141149	0.0320297	0.97019	143	165133
871.1	Open wound of hand except finger(s)	injuries & poisonings	-0.0163864	0.00764838	0.0321563	0.983747	409	164571
337.1	Peripheral autonomic neuropathy	neurological	0.0228831	0.0107086	0.0326073	1.02315	184	165245
750.21	Congenital anomalies of intestine	congenital anomalies	-0.0250066	0.0117177	0.0328358	0.975303	205	165138
240	Simple and unspecified goiter	endocrine/metabolic	0.00682835	0.00320302	0.0330197	1.00685	1869	162218
608	Other disorders of male genital organs	genitourinary	-0.00740862	0.00348472	0.0335009	0.992619	2571	161346
952	Spinal cord injury without evidence of spinal bone injury	injuries & poisonings	-0.0206233	0.00970185	0.0335279	0.979588	285	165288
604.1	Redundant prepuce and phimosis/BXO	genitourinary	0.0303598	0.014307	0.0338353	1.03083	115	165655
800	Fracture of lower limb	injuries & poisonings	-0.00595574	0.00281092	0.0341085	0.994062	3164	161413
712	Infective connective tissue disorders	musculoskeletal	0.0235812	0.0111341	0.0341814	1.02386	157	165550
302	Sexual and gender identity disorders	mental disorders	-0.00960198	0.00453859	0.0343762	0.990444	1380	163120
255.21	Glucocorticoid deficiency	endocrine/metabolic	0.0101292	0.0048073	0.0351138	1.01018	960	164279
635	Hemorrhage during pregnancy; childbirth and postpartum	pregnancy complications	-0.00797615	0.00378655	0.0351658	0.992056	1434	163114
255.2	Adrenal hypofunction	endocrine/metabolic	0.0100988	0.00480053	0.0354058	1.01015	964	164269
470	Septal Deviations/Turbinate Hypertrophy	respiratory	-0.00546132	0.00259947	0.035647	0.994554	4013	158002
573.7	Abnormal results of function study of liver	digestive	0.00627269	0.00301438	0.0374411	1.00629	2646	159998
736.2	Acquired deformities of finger	musculoskeletal	-0.0192753	0.00926825	0.0375521	0.980909	310	165329
270.2	Disorders of amino-acid metabolism	endocrine/metabolic	0.0310765	0.0149437	0.0375657	1.03156	89	165489
540.1	Appendicitis	digestive	-0.0116967	0.00562478	0.0375718	0.988371	822	164606
870.6	Open wound of neck	injuries & poisonings	-0.048082	0.0231351	0.0376801	0.953056	59	165680
283.21	Hemolytic-uremic syndrome	hematopoietic	-0.050689	0.0244092	0.0378354	0.950574	51	165819
729.1	Rheumatism, unspecified and fibrositis	musculoskeletal	0.0218876	0.0105891	0.0387341	1.02213	161	165709
440.22	Atherosclerosis of native arteries of the extremities with intermittent claudication	circulatory system	-0.0105607	0.005131	0.0395689	0.989495	1131	163306
750.11	Esophageal atresia/tracheoesophageal fistula	congenital anomalies	-0.0363388	0.0176627	0.0396499	0.964313	96	165627
447	Other disorders of arteries and arterioles	circulatory system	-0.00495165	0.00241004	0.0399182	0.995061	5449	157507
41.21	Rheumatic fever / chorea	infectious diseases	0.0179468	0.00873606	0.0399433	1.01811	338	165444
363.4	Choroidal degenerations	sense organs	-0.0679519	0.0330837	0.0399819	0.934305	35	165835
594.2	Calculus of lower urinary tract	genitourinary	-0.0199427	0.00977412	0.0413142	0.980255	393	165217
661	Fetal distress and abnormal forces of labor	pregnancy complications	-0.0110433	0.00542109	0.0416397	0.989017	706	163495
710.12	Chronic osteomyelitis	musculoskeletal	0.0121537	0.00598063	0.0421361	1.01223	608	164855
571.8	Liver abscess and sequelae of chronic liver disease	digestive	-0.00834369	0.00411054	0.0423739	0.991691	1723	163139
297.2	Suicide or self-inflicted injury	mental disorders	0.0165986	0.00818016	0.0424455	1.01674	256	165331
394.4	Acute rheumatic heart disease	circulatory system	-0.0301262	0.0148536	0.0425384	0.970323	153	165656
297.1	Suicidal ideation	mental disorders	0.0133245	0.0065837	0.042985	1.01341	397	164688
742.9	Other derangement of joint	musculoskeletal	0.00475362	0.00235531	0.0435651	1.00476	3939	158545
585.34	Chronic Kidney Disease, Stage IV	genitourinary	0.00607585	0.00301894	0.0441592	1.00609	2665	162328
795.82	Elevated cancer antigen 125 [CA 125]	symptoms	-0.0278659	0.0138464	0.0441669	0.972519	141	165729
381.2	Eustachian tube disorders	sense organs	0.00719524	0.0035958	0.0453909	1.00722	1780	160545
716.1	Unspecified polyarthropathy or polyarthritis	musculoskeletal	0.023894	0.0119543	0.0456321	1.02418	123	165629
242.3	Exophthalmos	endocrine/metabolic	0.0165887	0.00832191	0.04622	1.01673	274	165297
816	Cerebral laceration and contusion	injuries & poisonings	-0.0453674	0.022771	0.0463343	0.955646	63	165807
736.1	Acquired deformities of forearm	musculoskeletal	-0.0437153	0.0220103	0.0470191	0.957226	59	165697
783	Fever of unknown origin	symptoms	-0.00327925	0.00165163	0.0470938	0.996726	9268	146762
947	Urticaria	dermatologic	0.00583618	0.00294583	0.0475726	1.00585	2357	161008
523	Gingival and periodontal diseases	digestive	-0.0137444	0.00694182	0.04771	0.98635	562	164174
514	Abnormal findings examination of lungs	respiratory	-0.00244704	0.00123969	0.0483916	0.997556	19981	136285
710.19	Unspecified osteomyelitis	musculoskeletal	0.0093697	0.00475158	0.0486197	1.00941	1019	164100
277.1	Disorders of porphyrin metabolism	endocrine/metabolic	-0.0488254	0.02478	0.048798	0.952347	58	165812
596.1	Bladder neck obstruction	genitourinary	-0.0157784	0.0080127	0.0489335	0.984345	660	164456
38.3	Bacteremia	infectious diseases	-0.00685536	0.00348949	0.0494637	0.993168	2104	161857
325	Phlebitis and thrombophlebitis of intracranial venous sinuses	neurological	0.0210645	0.010723	0.04948	1.02129	152	165718
592.11	Acute cystitis	genitourinary	-0.00768949	0.00391572	0.0495594	0.99234	1585	161013
444.5	Atheroembolism	circulatory system	-0.0519985	0.026596	0.0505681	0.94933	52	165818
528.4	Cysts of oral soft tissues	digestive	-0.0292761	0.015072	0.0520873	0.971148	131	165593
580.31	Nephritis and nephropathy in diseases classified elsewhere	genitourinary	-0.0104451	0.00538735	0.0525239	0.989609	805	164596
733.2	Cyst of bone	musculoskeletal	0.0223174	0.0115184	0.0526783	1.02257	147	165408
245	Thyroiditis	endocrine/metabolic	0.00546758	0.00282341	0.0528045	1.00548	2882	161323
230	Kaposi's sarcoma	neoplasms	-0.0437635	0.0226042	0.0528584	0.95718	75	165795
440.1	Atherosclerosis of renal artery	circulatory system	-0.0169626	0.00876484	0.0529531	0.98318	401	164921
426.22	Mobitz II AV block	circulatory system	0.0288537	0.01493	0.0532856	1.02927	115	165624
535.6	Duodenitis	digestive	-0.00800911	0.00417463	0.0550452	0.992023	1410	162997
756.5	Congenital osteodystrophies	congenital anomalies	-0.00833111	0.00434571	0.0552264	0.991703	1280	162791
850	Hemorrhage or hematoma complicating a procedure	injuries & poisonings	-0.0115228	0.00604916	0.0567984	0.988543	763	163459
530.14	Reflux esophagitis	digestive	0.00566794	0.00297726	0.0569441	1.00568	2672	160027
252.2	Hypoparathyroidism	endocrine/metabolic	0.0150605	0.00791473	0.0570613	1.01517	324	165307
818.2	Subarachnoid hemorrhage (injury)	injuries & poisonings	-0.0466624	0.0245237	0.0570733	0.95441	55	165815
258.1	Postablative ovarian failure	endocrine/metabolic	-0.0299891	0.0157718	0.0572446	0.970456	103	165662
285.1	Acute posthemorrhagic anemia	hematopoietic	0.00655636	0.00345596	0.0578129	1.00658	1975	156773
523.1	Gingivitis	digestive	-0.0251746	0.0133133	0.0586325	0.97514	179	165452
573.4	Acute and subacute necrosis of liver	digestive	-0.0232153	0.0123148	0.0594086	0.977052	188	164706
442.8	Aneurysm of other specified artery	circulatory system	-0.0128632	0.00682616	0.0595109	0.987219	598	164769
647.1	Infections of genitourinary tract during pregnancy	pregnancy complications	0.0086953	0.00462668	0.0601927	1.00873	692	164541
732.7	Osteochondritis dissecans	musculoskeletal	0.0249391	0.0132812	0.0604119	1.02525	101	165649
711	Arthropathy associated with infections	musculoskeletal	0.0121078	0.00646817	0.0612206	1.01218	516	164942
601.12	Chronic prostatitis	genitourinary	-0.0203378	0.0108887	0.0617926	0.979868	354	164856
287.32	Secondary thrombocytopenia	hematopoietic	-0.0170382	0.00914489	0.0624428	0.983106	356	164283
701.3	Circumscribed scleroderma	dermatologic	-0.012686	0.00681863	0.062817	0.987394	545	165010
324	Other CNS infection and poliomyelitis	neurological	0.00683717	0.00367896	0.0631053	1.00686	1651	162372
687.1	Rash and other nonspecific skin eruption	dermatologic	0.00318233	0.0017195	0.0642082	1.00319	7753	146266
599.7	Urethral discharge	genitourinary	-0.0267389	0.0144913	0.0650133	0.973615	120	165547
530.12	Ulcer of esophagus	digestive	-0.0154249	0.00844236	0.0676879	0.984693	401	165032
348.8	Encephalopathy, not elsewhere classified	neurological	-0.0111871	0.00613808	0.0683669	0.988875	684	163289
591	Urinary tract infection	genitourinary	-0.00280165	0.0015383	0.068568	0.997202	10199	145778
791	Gangrene	symptoms	-0.0141017	0.00776425	0.0693342	0.985997	422	164977
440	Atherosclerosis	circulatory system	-0.0045383	0.00250551	0.0700904	0.995472	4827	155682
747.13	Congenital anomalies of great vessels	congenital anomalies	-0.0105224	0.00581464	0.0703507	0.989533	787	163748
706.2	Sebaceous cyst	dermatologic	-0.00483555	0.00267389	0.0705392	0.995176	3608	157046
618.6	Vaginal enterocele, congenital or acquired	genitourinary	-0.0277167	0.0153264	0.0705406	0.972664	129	165741
427.8	Sinoatrial node dysfunction (Bradycardia)	circulatory system	0.0058181	0.00321847	0.07065	1.00584	3052	161215
530.5	Disorders of esophageal motility	digestive	-0.0108179	0.00598593	0.0707287	0.98924	737	164497
627.4	Premenopausal menorrhagia	genitourinary	0.0126994	0.00703657	0.0711114	1.01278	330	165068
530.15	Eosinophilic esophagitis	digestive	-0.0130756	0.00725304	0.0714232	0.987009	514	165142
704.11	Alopecia Areata	dermatologic	-0.0156605	0.00869117	0.0715634	0.984461	339	165037
41.11	Methicillin sensitive Staphylococcus aureus	infectious diseases	0.0104426	0.00580624	0.0720948	1.0105	648	164395
285	Other anemias	hematopoietic	0.00196156	0.00109271	0.0726334	1.00196	24402	127326
365.5	Pseudoexfoliation glaucoma	sense organs	-0.0424155	0.0236579	0.0729933	0.958471	82	165788
198.7	Secondary malignant neoplasm of skin	neoplasms	-0.0265531	0.0148152	0.0730863	0.973796	150	165522
610.8	Other specified benign mammary dysplasias	genitourinary	-0.00969842	0.00541157	0.0731068	0.990348	810	163683
709.6	Other specified diffuse diseases of connective tissue	dermatologic	-0.0196777	0.0109806	0.0731269	0.980515	194	165549
618.5	Prolapse of vaginal vault after hysterectomy	genitourinary	-0.0244706	0.0137308	0.0747218	0.975826	146	165724
747.12	Valvular heart disease/ heart chambers	congenital anomalies	-0.00697037	0.00392681	0.0758859	0.993054	1942	163351
215	Other benign neoplasm of connective and other soft tissue	neoplasms	0.00401455	0.00227504	0.0776296	1.00402	3729	160170
259.2	Carcinoid syndrome	endocrine/metabolic	0.0224529	0.012747	0.0781657	1.02271	138	165681
496	Chronic airway obstruction	respiratory	-0.00308145	0.00176147	0.0802291	0.996923	9738	151854
286.3	Coagulation defects complicating pregnancy or postpartum	hematopoietic	-0.0106508	0.00609481	0.080546	0.989406	577	164758
394.1	Mitral valve stenosis and aortic valve stenosis	circulatory system	-0.0161626	0.00929036	0.0819086	0.983967	381	164617
366.1	Nonsenile Cataract	sense organs	-0.0540785	0.0311942	0.0829879	0.947358	34	165700
536.3	Gastroparesis	digestive	-0.0069588	0.00402366	0.0837251	0.993065	1415	163907
480.13	MRSA pneumonia	respiratory	-0.0578427	0.0335466	0.0846626	0.943798	35	165695
613.5	Mastodynia	genitourinary	-0.00442587	0.00257139	0.0852154	0.995584	3228	159886
371.1	Uveitis, noninfectious or NOS	sense organs	-0.00821286	0.00477686	0.0855595	0.991821	965	164562
411.41	Aneurysm and dissection of heart	circulatory system	-0.0166152	0.00971742	0.0872959	0.983522	311	165365
709.5	Dermatomyositis	dermatologic	-0.0171081	0.0100071	0.0873408	0.983037	268	165548
709.2	Sicca syndrome	dermatologic	-0.00665736	0.00389502	0.0874142	0.993365	1540	163817
714.2	Juvenile rheumatoid arthritis	musculoskeletal	-0.0206956	0.0121281	0.08793	0.979517	180	165634
364	Corneal opacity and other disorders of cornea	sense organs	-0.0086242	0.00506595	0.0886832	0.991413	1022	164119
427.7	Tachycardia NOS	circulatory system	0.00279681	0.0016445	0.0889985	1.0028	8463	146408
282.9	Other hereditary hemolytic anemias	hematopoietic	0.0139754	0.00821859	0.0890451	1.01407	244	165403
41.4	E. coli	infectious diseases	0.00932781	0.00549384	0.0895329	1.00937	669	163575
458.2	Iatrogenic hypotension	circulatory system	0.0164657	0.00970312	0.0897065	1.0166	241	163866
941	Adverse reaction to serum or vaccine	injuries & poisonings	0.00881742	0.00519774	0.0898108	1.00886	663	164023
526.1	Cysts of the jaws	digestive	-0.0257011	0.0151547	0.0899015	0.974626	127	165622
705.1	Dyshidrosis	dermatologic	0.0154116	0.00910464	0.0905094	1.01553	229	165181
593.1	Gross hematuria	genitourinary	0.00594088	0.00351406	0.0909128	1.00596	2280	161918
874	Complication of amputation stump	injuries & poisonings	0.0189834	0.0112319	0.0910029	1.01916	163	165592
426.8	Other cardiac conduction disorders	circulatory system	0.00756766	0.00447909	0.0911137	1.0076	1029	161868
155.1	Malignant neoplasm of liver, primary	neoplasms	-0.0109782	0.0065002	0.0912376	0.989082	790	164751
931	Contact dermatitis and other eczema due to plants [except food]	dermatologic	-0.0137163	0.00815949	0.0927576	0.986377	433	163871
987	Toxic effect of other gases, fumes, or vapors	injuries & poisonings	0.0226013	0.0135031	0.0941724	1.02286	89	165781
368	Visual disturbances	sense organs	0.00319768	0.00191056	0.0941914	1.0032	6476	152135
362.8	Retinal hemorrhage/ischemia	sense organs	-0.0144989	0.00867615	0.094697	0.985606	370	165283
716.8	Palindromic rheumatism	musculoskeletal	-0.0461303	0.0276136	0.094808	0.954918	42	165828
361.1	Retinal detachment with retinal defect	sense organs	-0.0147482	0.00883212	0.0949519	0.98536	380	165288
379.51	Pigmentary iris degeneration	sense organs	-0.0353118	0.021239	0.0963936	0.965304	77	165793
200.1	Polycythemia vera	neoplasms	-0.0171269	0.0103185	0.0969489	0.983019	313	165408
159.2	Malignant neoplasm of small intestine, including duodenum	neoplasms	-0.0187216	0.0112891	0.097242	0.981453	245	165461
769	Nonallopathic lesions NEC	symptoms	-0.0150736	0.00910601	0.0978531	0.985039	309	165067
694.3	Vascular disorders of skin	dermatologic	0.0228098	0.0137913	0.0981409	1.02307	106	165541
420.21	Acute pericarditis	circulatory system	-0.0160423	0.00969973	0.09815	0.984086	280	165205
379.4	Anomalies of pupillary function	sense organs	-0.0168307	0.0101813	0.0983097	0.98331	257	165143
528.3	Cellulitis and abscess of oral soft tissues	digestive	-0.0235437	0.0142517	0.0985365	0.976731	125	165393
365.1	Open-angle glaucoma	sense organs	-0.00462485	0.00282133	0.101161	0.995386	3311	161609
346.3	Nonspecific abnormal findings in cerebrospinal fluid	neurological	0.0273651	0.0167131	0.101558	1.02774	73	165797
287.2	Allergic purpura	hematopoietic	0.024598	0.0150347	0.101823	1.0249	87	165783
389.3	Degenerative and vascular disorders of ear	sense organs	-0.0285615	0.017608	0.104788	0.971843	129	165287
535.8	Other specified gastritis	digestive	0.00837393	0.00519163	0.106752	1.00841	833	162843
540.11	Acute appendicitis	digestive	-0.0111419	0.00691985	0.107368	0.98892	515	165036
315.3	Mental retardation	mental disorders	-0.0202426	0.0125743	0.107431	0.979961	156	165559
132	Infestation (lice, mites)	infectious diseases	-0.0196977	0.0122864	0.108888	0.980495	171	165094
614.53	Cyst or abscess of Bartholin's gland	genitourinary	-0.0139123	0.00868123	0.10903	0.986184	248	165403
754	Congenital musculoskeletal deformities of spine	congenital anomalies	-0.0163363	0.0102048	0.109411	0.983796	252	165221
261.41	Rickets or osteomalacia	endocrine/metabolic	-0.012966	0.00812907	0.110708	0.987118	359	165317
580.4	Renal sclerosis, NOS	genitourinary	-0.01141	0.00716659	0.11136	0.988655	460	164465
306.9	Tension headache	mental disorders	0.00763063	0.00479664	0.111648	1.00766	845	163217
225.2	Benign neoplasm of spinal cord, meninges	neoplasms	0.0186397	0.0117821	0.113642	1.01881	150	165720
527.8	Other specified diseases of the salivary glands	digestive	0.0087445	0.0055305	0.113846	1.00878	764	164675
580	Nephritis; nephrosis; renal sclerosis	genitourinary	-0.00450234	0.00285313	0.114557	0.995508	2972	161122
644	Anemia during pregnancy	pregnancy complications	0.00438923	0.00278299	0.114758	1.0044	2299	162208
724.1	Disorders of sacrum	musculoskeletal	0.0110818	0.00703243	0.115068	1.01114	407	164830
362.4	Retinal vascular changes and abnomalities	sense organs	-0.00840668	0.00534027	0.11544	0.991629	993	164492
716.2	Unspecified monoarthritis	musculoskeletal	0.0284635	0.0180854	0.115525	1.02887	58	165638
986	Toxic effect of carbon monoxide	injuries & poisonings	0.0275176	0.0175393	0.11667	1.0279	47	165823
592.21	Urethral syndrome	genitourinary	-0.0296869	0.0189424	0.117063	0.970749	72	165798
289.5	Diseases of spleen	hematopoietic	-0.011816	0.00754066	0.117122	0.988254	434	164716
368.1	Amblyopia	sense organs	0.0108786	0.00695942	0.118017	1.01094	433	165195
526.3	Anomalies of jaw size/symmetry	digestive	-0.0171995	0.0110114	0.118294	0.982948	239	165448
686.2	Impetigo	dermatologic	-0.0195411	0.0125883	0.120584	0.980649	177	165093
722.7	Intervertebral disc disorder with myelopathy	musculoskeletal	0.0118572	0.00765004	0.121153	1.01193	371	164957
748	Anomalies of respiratory system, congenital	congenital anomalies	-0.0178163	0.0114977	0.121248	0.982341	207	165415
579	Other symptoms involving abdomen and pelvis	digestive	0.00326922	0.00211031	0.121342	1.00327	5371	154514
276.42	Alkalosis	endocrine/metabolic	0.0134494	0.00869478	0.121901	1.01354	259	164235
302.1	Decreased libido	mental disorders	-0.00895532	0.00579173	0.12205	0.991085	888	163939
840.1	Muscle/tendon sprain	injuries & poisonings	0.0235655	0.0153427	0.124551	1.02385	89	165260
528.41	Cyst of the salivary gland	digestive	-0.0239326	0.0155883	0.124713	0.976352	118	165626
277.2	Other disorders of purine and pyrimidine metabolism	endocrine/metabolic	0.0409296	0.0267836	0.126473	1.04178	26	165844
612.1	Galactorrhea	genitourinary	0.012963	0.0084833	0.126497	1.01305	211	165403
726.2	Synoviopathy	musculoskeletal	0.00720101	0.00471285	0.126524	1.00723	1048	163423
315.1	Learning disorder	mental disorders	0.0174776	0.0114929	0.128328	1.01763	122	165619
41.2	Streptococcus infection	infectious diseases	0.00547595	0.00360248	0.128499	1.00549	1635	162133
242.2	Toxic multinodular goiter	endocrine/metabolic	0.0204045	0.0134286	0.128641	1.02061	105	165677
741.1	Ankylosis of joint	musculoskeletal	0.0171043	0.0112924	0.129854	1.01725	150	165565
639	Complications following abortion or ectopic and molar pregnancies	pregnancy complications	0.0257513	0.017049	0.130935	1.02609	48	165822
370.1	Corneal ulcer	sense organs	-0.0148355	0.00984164	0.131703	0.985274	249	165488
696.2	Parapsoriasis	dermatologic	-0.0250103	0.0166147	0.132243	0.9753	117	165753
624	Symptoms involving female genital tract	genitourinary	0.00424867	0.00282969	0.133237	1.00426	2612	159981
286.6	Defibrination syndrome	hematopoietic	-0.0352015	0.0235066	0.13426	0.965411	58	165542
634	Miscarriage; stillbirth	pregnancy complications	-0.00386696	0.00258573	0.134784	0.996141	2963	160955
752.2	Other specified congenital anomalies of nervous system	congenital anomalies	-0.0118461	0.00793875	0.135649	0.988224	390	165229
907	Injuries to the nervous system	injuries & poisonings	-0.0128248	0.00859514	0.135674	0.987257	343	165099
750.5	Congenital hypertrophic pyloric stenosis	congenital anomalies	-0.0816009	0.0549228	0.137349	0.92164	16	165854
377.3	Optic neuritis/neuropathy	sense organs	0.0068817	0.00464794	0.138716	1.00691	1034	164439
274.21	Chondrocalcinosis	endocrine/metabolic	0.0119078	0.00805884	0.139514	1.01198	397	165110
600	Hyperplasia of prostate	genitourinary	-0.00327633	0.00222074	0.140123	0.996729	10526	151216
149.9	Cancer of of nasal cavities	neoplasms	-0.0182239	0.0124169	0.142193	0.981941	208	165584
650	Normal delivery	pregnancy complications	-0.00806288	0.00550845	0.143267	0.99197	719	162962
870.2	Open wound of ear	injuries & poisonings	-0.0281672	0.019358	0.145651	0.972226	66	165622
366	Cataract	sense organs	0.00227361	0.00156459	0.146179	1.00228	12947	147931
529.1	Glossitis	digestive	-0.0145012	0.00999247	0.146722	0.985603	291	165133
274.2	Crystal arthropathies	endocrine/metabolic	0.0111224	0.00766756	0.146898	1.01118	437	165036
133	Arthropod-borne diseases	infectious diseases	-0.0232173	0.0160243	0.147371	0.97705	112	165676
275.3	Disorders of magnesium metabolism	endocrine/metabolic	0.00369847	0.00255291	0.147414	1.00371	3575	156397
985	Toxic effect of other metals	injuries & poisonings	-0.0237579	0.0164914	0.149691	0.976522	121	165749
729.7	Nontraumatic compartment syndrome	musculoskeletal	-0.0191658	0.0133128	0.149966	0.981017	153	165717
378.2	Nystagmus and other irregular eye movements	sense organs	-0.0180485	0.0125374	0.149988	0.982113	174	165442
134	Helminthiases	infectious diseases	-0.022917	0.0159873	0.151728	0.977344	115	165609
362.1	Retinopathy of prematurity	sense organs	-0.0515449	0.0359745	0.15191	0.949761	24	165846
270.35	Macroglobulinemia	endocrine/metabolic	-0.0228671	0.0159712	0.152211	0.977392	157	165713
522.1	Pulpitis and necrosis of tooth pulp	digestive	0.025176	0.0175934	0.152434	1.0255	52	165818
818.1	Subdural hemorrhage (injury)	injuries & poisonings	-0.0270817	0.018977	0.153556	0.973282	89	165781
619.2	Disorders of uterus, NEC	genitourinary	0.0069412	0.00486494	0.153643	1.00697	767	162848
371.9	Chronic inflammatory disorders of orbit	sense organs	0.0232228	0.0163375	0.155188	1.02349	67	165803
359	Muscular dystrophies and other myopathies	neurological	-0.00802537	0.00566705	0.156733	0.992007	837	164295
512.3	Abnormal chest sounds	respiratory	-0.0283699	0.0200748	0.157594	0.972029	79	165606
366.2	Senile cataract	sense organs	0.0024832	0.00175722	0.157614	1.00249	9441	152808
447.1	Stricture of artery	circulatory system	-0.0126874	0.00902422	0.159747	0.987393	347	165005
703	Diseases of nail, NOS	dermatologic	-0.00559371	0.00398028	0.159916	0.994422	1538	161863
715.2	Ankylosing spondylitis	musculoskeletal	-0.0119938	0.00854141	0.16026	0.988078	378	165351
643.1	Hyperemesis gravidarum	pregnancy complications	-0.0134548	0.00958564	0.160425	0.986635	188	165412
378.5	Paralytic strabismus	sense organs	0.0103372	0.00741667	0.163386	1.01039	463	165165
272.14	Hyperchylomicronemia	endocrine/metabolic	0.0226631	0.0162851	0.164029	1.02292	84	165786
656.22	Interstitial emphysema and related conditions of newborn	pregnancy complications	-0.0980999	0.0705538	0.164399	0.906558	8	165862
153.2	Colon cancer	neoplasms	-0.00490639	0.00355043	0.166998	0.995106	2314	162901
90	Sexually transmitted infections (not HIV or hepatitis)	infectious diseases	0.00387793	0.00281375	0.168139	1.00389	2051	162437
286.1	Congenital coagulation defects	hematopoietic	-0.00940033	0.0068448	0.169642	0.990644	557	165064
337	Disorders of the autonomic nervous system	neurological	-0.0091428	0.00666612	0.170209	0.990899	587	164570
521.2	Dental abrasion, erosion and attrition	digestive	-0.0359281	0.0262993	0.171899	0.96471	55	165815
374.1	Ectropion or entropion	sense organs	-0.0125747	0.00921376	0.172324	0.987504	368	165228
958.1	Postoperative shock	injuries & poisonings	-0.032488	0.023814	0.172492	0.968034	57	165117
333.3	Tics and choreas	neurological	-0.0236726	0.0173557	0.172578	0.976605	94	165776
396	Abnormal heart sounds	circulatory system	0.00302228	0.00221654	0.17272	1.00303	4943	157770
755.61	Congenital hip dysplasia and deformity	congenital anomalies	-0.017457	0.0128194	0.173273	0.982694	158	165618
289.9	Abnormality of red blood cells	hematopoietic	0.00940724	0.00691561	0.173738	1.00945	432	164539
972.2	Antilipemic and antiarteriosclerotic drugs causing adverse effects in therapeutic use	injuries & poisonings	0.0215347	0.0159191	0.176133	1.02177	100	165770
965.3	Salicylates causing adverse effects in therapeutic use	injuries & poisonings	0.0247824	0.0183842	0.17765	1.02509	57	165813
601.11	Acute prostatitis	genitourinary	-0.0182038	0.0135047	0.17767	0.981961	221	165085
250.21	Type 2 diabetes with ketoacidosis	endocrine/metabolic	-0.0114766	0.00852499	0.17823	0.988589	281	165194
245.1	Thyroiditis, acute and subacute	endocrine/metabolic	-0.0255976	0.0191227	0.180701	0.974727	80	165700
758.1	Chromosomal anomalies	congenital anomalies	0.0107222	0.00801822	0.181149	1.01078	323	165345
225	Benign neoplasm of brain and other parts of nervous system	neoplasms	0.00550652	0.00412886	0.182314	1.00552	1482	163872
134.1	Intestinal helminthiases	infectious diseases	-0.0180603	0.0135426	0.182337	0.982102	154	165716
772.6	Facial weakness	symptoms	0.00846164	0.006345	0.182338	1.0085	535	164411
756.3	Congenital anomalies of muscle, tendon, fascia, and connective tissue	congenital anomalies	-0.0155478	0.011696	0.18374	0.984572	187	165546
704.12	Telogen effluvium	dermatologic	-0.017003	0.0128252	0.184921	0.983141	148	165351
362.5	Toxic maculopathy of retina	sense organs	-0.0560123	0.0424727	0.187241	0.945527	18	165852
359.2	Myopathy	neurological	-0.00805467	0.00613037	0.188881	0.991978	712	164458
204.2	Myeloid leukemia	neoplasms	-0.00777484	0.00593093	0.189892	0.992255	819	164725
425.2	Secondary/extrinsic cardiomyopathies	circulatory system	0.0045264	0.00345332	0.189945	1.00454	2128	162314
691.3	Congenital pigmentary anomalies of skin	dermatologic	-0.0229933	0.0176273	0.192092	0.977269	94	165776
523.3	Periodontitis (acute or chronic)	digestive	-0.0197264	0.0152815	0.196749	0.980467	123	165331
695.21	Dermatitis herpetiformis	dermatologic	0.0208292	0.0161599	0.197418	1.02105	77	165793
523.31	Acute periodontitis	digestive	-0.0236974	0.0183901	0.197539	0.976581	86	165510
624.2	Atrophy of female genital tract	genitourinary	-0.0181583	0.0141469	0.199299	0.982006	138	165732
636.8	Cervical incompetence	pregnancy complications	0.00899118	0.00700957	0.199597	1.00903	295	165194
225.1	Benign neoplasm of brain, cranial nerves, meninges	neoplasms	0.00539928	0.00422735	0.201522	1.00541	1418	163991
286.5	Hemorrhagic disorder due to intrinsic circulating anticoagulants	hematopoietic	0.0173774	0.0136072	0.201577	1.01753	104	165766
364.4	Corneal degenerations	sense organs	0.00950654	0.00744459	0.201612	1.00955	386	165283
521.4	Tooth complications likely association with other diseases	digestive	-0.0625578	0.049049	0.202163	0.939359	15	165855
647	Infectious and parasitic complications affecting pregnancy	pregnancy complications	0.00417273	0.00327577	0.202729	1.00418	1576	162803
395.6	Heart valve replaced	circulatory system	0.00357405	0.00281069	0.203517	1.00358	4198	160549
604.2	Vascular disorders of penis	genitourinary	-0.0711923	0.0560575	0.204089	0.931283	12	165858
79	Viral infection	infectious diseases	-0.00213415	0.00168179	0.20445	0.997868	8022	147907
334	Degenerative disease of the spinal cord	neurological	-0.00509482	0.00401511	0.204472	0.994918	1616	163056
433.5	Cerebral aneurysm	circulatory system	-0.00557729	0.00439819	0.204767	0.994438	1279	164239
353.2	Nerve root lesions	neurological	-0.0257408	0.0203211	0.205263	0.974588	67	165643
303.1	Dissociative disorder	mental disorders	0.0179475	0.0142491	0.20783	1.01811	85	165686
270.21	Disorders of urea cycle metabolism	endocrine/metabolic	0.0211291	0.0167805	0.207977	1.02135	73	165553
253.11	Acromegaly and gigantism	endocrine/metabolic	0.0183657	0.0146147	0.208875	1.01854	105	165765
194	Cancer of other endocrine glands	neoplasms	-0.0153238	0.0121979	0.209022	0.984793	192	165523
586.2	Cyst of kidney, acquired	genitourinary	0.00342627	0.00273456	0.210224	1.00343	3631	158204
647.3	Major puerperal infection	pregnancy complications	0.0126441	0.0100984	0.210539	1.01272	157	165713
973	Poisoning by agents primarily affecting the gastrointestinal system	injuries & poisonings	-0.103712	0.0832695	0.212948	0.901485	7	165863
676	Other disorders of the breast associated with childbirth and disorders of lactation	pregnancy complications	-0.0251575	0.020268	0.214518	0.975156	65	165589
285.21	Anemia in chronic kidney disease	hematopoietic	-0.00348109	0.00283489	0.219468	0.996525	3076	160885
691	Congenital anomalies of skin	dermatologic	-0.00785599	0.00643707	0.222302	0.992175	620	163774
594.8	Renal colic	genitourinary	0.0130985	0.0109211	0.230382	1.01318	191	165129
427.42	Cardiac arrest	circulatory system	-0.00690013	0.00576912	0.231678	0.993124	797	164339
110.2	Dermatomycoses	infectious diseases	-0.00716475	0.0059909	0.231721	0.992861	633	163835
531.1	Hemorrhage from gastrointestinal ulcer	digestive	-0.0106502	0.00891331	0.23214	0.989406	354	165104
255.13	Medulloadrenal hyperfunction	endocrine/metabolic	-0.0609246	0.0513916	0.235821	0.940894	13	165857
446.9	Arteritis NOS	circulatory system	0.00774438	0.00656362	0.238042	1.00777	541	165050
38.1	Gram negative septicemia	infectious diseases	-0.0105378	0.00893721	0.238359	0.989517	319	164336
754.1	Lumbosacral spondylolysis, congenital	congenital anomalies	0.0308864	0.0263144	0.240498	1.03137	27	165843
799	Debility unspecified	symptoms	0.01409	0.0120438	0.242043	1.01419	151	165415
440.2	Atherosclerosis of the extremities	circulatory system	-0.00449509	0.0038494	0.242913	0.995515	1899	161953
395.4	Nonrheumatic pulmonary valve disorders	circulatory system	-0.00971753	0.00832734	0.243233	0.99033	383	164876
368.7	Disorders of accommodation	sense organs	-0.0409456	0.0355127	0.248917	0.959881	21	165849
870	Open wounds of head; neck; and trunk	injuries & poisonings	-0.00377507	0.0032843	0.250379	0.996232	2214	159696
360.3	Hypotony of eye	sense organs	-0.0284438	0.0248035	0.251478	0.971957	45	165825
288.3	Eosinophilia	hematopoietic	-0.0107865	0.0094172	0.252042	0.989271	304	165259
504	Other alveolar and parietoalveolar pneumonopathy	respiratory	0.00403725	0.00353579	0.253528	1.00405	2133	162334
965	Poisoning by analgesics, antipyretics, and antirheumatics	injuries & poisonings	0.00471861	0.00414168	0.254578	1.00473	1249	161296
780	Hypothermia/Chills	symptoms	-0.00687994	0.00614371	0.262784	0.993144	619	163421
737.1	Kyphosis (acquired)	musculoskeletal	-0.0112401	0.0100775	0.264693	0.988823	291	165226
363	Chorioretinal inflammations, scars, and other disorders of choroid	sense organs	-0.0119079	0.0106831	0.264999	0.988163	228	165485
442.3	Aneurysm of artery of lower extremity	circulatory system	0.0117696	0.0105869	0.266261	1.01184	268	165348
521.1	Dental caries	digestive	0.00504959	0.00455728	0.267851	1.00506	1007	163766
750.13	Congenital anomalies of mouth/tongue	congenital anomalies	-0.0193292	0.0174967	0.269275	0.980856	97	165490
327.41	Organic or persistent insomnia	neurological	-0.0046339	0.00419793	0.269657	0.995377	1408	163325
722.3	Schmorl's nodes	musculoskeletal	0.0156802	0.014209	0.269794	1.0158	111	165759
250.14	Type 1 diabetes with neurological manifestations	endocrine/metabolic	-0.00979875	0.00889286	0.270519	0.990249	299	165384
772.1	Muscular wasting and disuse atrophy	symptoms	0.00729255	0.00662252	0.27082	1.00732	622	164321
988	Toxic effect of noxious substances eaten as food	injuries & poisonings	-0.0158373	0.0144076	0.271668	0.984287	116	165754
292.6	Hallucinations	mental disorders	-0.011254	0.0102853	0.273876	0.988809	215	165170
346.2	Nonspecific abnormal results of function study of brain and central nervous system	neurological	-0.0193503	0.0177317	0.275149	0.980836	84	165600
331.9	Cerebral degeneration, unspecified	neurological	-0.0188815	0.0173354	0.276072	0.981296	107	165566
189.4	Malignant neoplasm of other urinary organs	neoplasms	-0.00920643	0.00849132	0.278269	0.990836	507	165151
279.8	Other specified disorders involving the immune mechanism	endocrine/metabolic	-0.00905614	0.00838713	0.280246	0.990985	350	165153
473.1	Chronic laryngitis	respiratory	-0.0164154	0.0152252	0.280955	0.983719	121	165513
658	Maternal complication of pregnancy affecting fetus or newborn	pregnancy complications	0.0104329	0.0097161	0.282922	1.01049	187	165451
593	Hematuria	genitourinary	-0.00185614	0.00172928	0.28311	0.998146	9470	150445
706.3	Seborrhea	dermatologic	0.0166479	0.015541	0.284068	1.01679	90	165619
132.1	Pediculosis and phthirus infestation	infectious diseases	-0.0213308	0.0199314	0.284525	0.978895	66	165804
707.1	Decubitus ulcer	dermatologic	0.00705552	0.00660271	0.285259	1.00708	562	164480
283.1	Autoimmune hemolytic anemias	hematopoietic	-0.0141042	0.0132418	0.286818	0.985995	162	165708
442.11	Abdominal aortic aneurysm	circulatory system	0.00471817	0.00443209	0.287081	1.00473	1824	162656
749.1	Cleft palate	congenital anomalies	-0.0183883	0.0173675	0.289702	0.98178	98	165772
442.1	Aortic aneurysm	circulatory system	0.00275739	0.00261196	0.291114	1.00276	4934	159009
795.81	Elevated carcinoembryonic antigen [CEA]	symptoms	-0.0165702	0.0157093	0.291517	0.983566	126	165744
596	Other disorders of bladder	genitourinary	0.00243286	0.00231416	0.293124	1.00244	5073	156457
70.1	Viral hepatitis A	infectious diseases	-0.0105315	0.0100604	0.29518	0.989524	314	165412
580.3	Nephritis and nephropathy without mention of glomerulonephritis	genitourinary	-0.00365843	0.00352574	0.299439	0.996348	1877	162912
465.4	Acute laryngitis and tracheitis	respiratory	0.00885908	0.00857213	0.301382	1.0089	293	164486
348	Other conditions of brain	neurological	0.00240579	0.00232864	0.301542	1.00241	4200	157324
756.1	Congenital anomalies of abdominal wall; diaphram	congenital anomalies	0.0157547	0.0152995	0.303123	1.01588	87	165694
53.1	Herpes zoster with nervous system complications	infectious diseases	-0.00771155	0.00749717	0.30367	0.992318	490	164922
711.2	Reiter's disease	musculoskeletal	0.014843	0.0144542	0.30447	1.01495	104	165766
282	Hereditary hemolytic anemias	hematopoietic	-0.00297223	0.00289881	0.305208	0.997032	2159	162913
250.1	Type 1 diabetes	endocrine/metabolic	-0.00322118	0.00314746	0.306108	0.996784	2399	162220
344	Other paralytic syndromes	neurological	-0.00821131	0.00804628	0.307487	0.991822	379	164996
528.7	Sialolithiasis	digestive	-0.011963	0.0117229	0.307501	0.988108	180	165514
365.2	Primary angle-closure glaucoma	sense organs	-0.00531464	0.00521301	0.307968	0.994699	966	164571
370.2	Superficial keratitis	sense organs	-0.0159252	0.0156448	0.308715	0.984201	107	165539
949.1	Diaper or napkin rash	injuries & poisonings	0.0266617	0.0263823	0.312212	1.02702	28	165842
701.4	Keloid scar	dermatologic	0.00506237	0.0050143	0.312693	1.00508	768	164110
580.12	Non-proliferative glomerulonephritis	genitourinary	0.00737722	0.00730724	0.312698	1.0074	391	165228
279.2	Autoimmune disease NEC	endocrine/metabolic	-0.0170976	0.0171049	0.317516	0.983048	79	165653
359.1	Muscular dystrophies	neurological	-0.0142983	0.0143092	0.31768	0.985803	147	165656
362.3	Other nondiabetic retinopathy	sense organs	0.00591309	0.00592449	0.318242	1.00593	661	164779
500.1	Extrinsic allergic alveolitis	respiratory	0.0129498	0.0130121	0.319634	1.01303	157	165613
1004	Other signs and symptoms involving emotional state	symptoms	0.00451081	0.00453437	0.319832	1.00452	1021	162993
276.8	Polydipsia	endocrine/metabolic	0.00898818	0.00904634	0.320432	1.00903	227	165098
750.15	Congenital anomalies of stomach	congenital anomalies	-0.0144933	0.0146013	0.320903	0.985611	128	165742
521	Diseases of hard tissues of teeth	digestive	0.00441896	0.00445223	0.320941	1.00443	1065	163617
938.1	Acute dermatitis due to solar radiation	dermatologic	-0.0135958	0.0137277	0.321981	0.986496	137	165321
170	Cancer of bone and connective tissue	neoplasms	-0.00402339	0.00406417	0.322192	0.995985	1661	163568
741.5	Hemarthrosis	musculoskeletal	-0.0187124	0.0189508	0.323435	0.981462	83	165622
556.11	Angiodysplasia of intestine (without mention of hemorrhage)	digestive	-0.00849478	0.00862483	0.324663	0.991541	386	165067
369.5	Conjunctivitis, infectious	sense organs	0.00329373	0.00335038	0.325562	1.0033	1903	159344
218.2	Other benign neoplasm of uterus	neoplasms	0.0109533	0.0112452	0.330034	1.01101	133	165737
966	Poisoning by anticonvulsants and anti-Parkinsonism drugs	injuries & poisonings	-0.0216154	0.0222668	0.331674	0.978617	49	165647
365	Glaucoma	sense organs	-0.00193996	0.00199939	0.331909	0.998062	7044	156773
264.3	Delayed milestones	endocrine/metabolic	0.0464123	0.0479365	0.332943	1.04751	8	165862
695.1	Toxic erythema	dermatologic	-0.0142352	0.0147117	0.333237	0.985866	111	165609
270.11	Disturbances of sulphur-bearing amino-acid metabolism	endocrine/metabolic	0.0095658	0.00993455	0.335607	1.00961	249	165491
433.32	Moyamoya disease	circulatory system	0.0162061	0.0168419	0.335925	1.01634	61	165809
614.1	Pelvic peritoneal adhesions, female (postoperative) (postinfection)	genitourinary	0.0116429	0.0121381	0.337455	1.01171	107	165229
569.1	Toxic gastroenteritis and colitis	digestive	-0.0130579	0.01362	0.337694	0.987027	149	164984
636.2	Early onset of delivery	pregnancy complications	0.00740114	0.00773643	0.338738	1.00743	247	165150
313	Pervasive developmental disorders	mental disorders	0.00228688	0.00239247	0.33914	1.00229	4289	160131
580.1	Glomerulonephritis	genitourinary	-0.00535607	0.00563471	0.341833	0.994658	741	164677
316.1	Polyneuropathy due to drugs	mental disorders	0.00558045	0.00587625	0.342284	1.0056	703	164578
189.12	Malignant neoplasm of renal pelvis	neoplasms	0.0147228	0.0155718	0.344415	1.01483	131	165551
426.23	Second degree AV block	circulatory system	0.00683767	0.0072404	0.344977	1.00686	565	164808
614	Inflammatory diseases of female pelvic organs	genitourinary	-0.00176573	0.00187272	0.345746	0.998236	5638	153801
742.2	Pathological, developmental or recurrent dislocation	musculoskeletal	0.00994034	0.0105609	0.346582	1.00999	167	165478
758	Chromosomal anomalies and genetic disorders	congenital anomalies	-0.00690146	0.00733907	0.347027	0.993122	470	165162
505	Other pulmonary inflamation or edema	respiratory	0.00322688	0.0034387	0.34804	1.00323	2122	161045
315.2	Speech and language disorder	mental disorders	-0.0131442	0.0140252	0.348666	0.986942	129	165515
736.6	Unequal leg length (acquired)	musculoskeletal	-0.021603	0.0233308	0.354476	0.978629	48	165646
226	Benign neoplasm of thyroid glands	neoplasms	0.0075569	0.00821599	0.357688	1.00759	336	165043
433	Cerebrovascular disease	circulatory system	0.00135004	0.00146796	0.357744	1.00135	14447	146117
364.51	Fuchs' dystrophy	sense organs	0.011804	0.0128938	0.359943	1.01187	157	165624
586	Other disorders of the kidney and ureters	genitourinary	-0.00142271	0.0015628	0.362633	0.998578	12616	145743
342	Hemiplegia	neurological	-0.00628519	0.00692614	0.364164	0.993735	473	164542
292.12	Symbolic dysfunction	mental disorders	0.0155451	0.0172031	0.366196	1.01567	75	165676
477	Epistaxis or throat hemorrhage	respiratory	0.00328036	0.00364181	0.367721	1.00329	1861	161415
597.2	Urinary complications NEC	genitourinary	-0.0117806	0.0130796	0.367754	0.988289	162	165245
962.2	Insulins and antidiabetic agents causing adverse effects in therapeutic use	injuries & poisonings	0.0291887	0.0325245	0.369486	1.02962	17	165853
736.3	Acquired deformities of hip	musculoskeletal	-0.0144145	0.0160649	0.369575	0.985689	90	165780
749.2	Congenital anomalies of skull and face bones	congenital anomalies	-0.0132764	0.0147988	0.369651	0.986811	121	165749
446.2	Acute febrile mucocutaneous lymph node syndrome (Kawasaki disease)	circulatory system	-0.0257622	0.0288119	0.37124	0.974567	31	165839
292.5	Transient alteration of awareness	mental disorders	-0.00515963	0.00579704	0.373442	0.994854	710	164186
254	Diseases of thymus gland	endocrine/metabolic	0.0133345	0.0150454	0.375465	1.01342	82	165690
939	Atopic/contact dermatitis due to other or unspecified	dermatologic	-0.00131257	0.00148863	0.377922	0.998688	11196	143329
598.4	Other cells and casts in urine	genitourinary	0.0135373	0.0153783	0.378703	1.01363	109	165565
592.3	Urethral stricture due to infecton	genitourinary	0.021073	0.0239753	0.37943	1.0213	44	165826
38.2	Gram positive septicemia	infectious diseases	-0.0118179	0.0135329	0.382515	0.988252	136	165243
525.2	Atrophy of edentulous alveolar ridge	digestive	-0.0127049	0.0146975	0.387354	0.987375	136	165654
736	Other acquired deformities of limbs	musculoskeletal	0.00408859	0.00476802	0.391167	1.0041	969	163437
710.3	Osteopathy resulting from poliomyelitis	musculoskeletal	0.0344696	0.0402127	0.391345	1.03507	15	165855
527.2	Sialoadenitis	digestive	-0.00532018	0.00620879	0.391512	0.994694	638	164518
626.4	Premenstrual tension syndromes	genitourinary	-0.00637144	0.00747442	0.393974	0.993649	391	164978
623	Hypertrophy of female genital organs	genitourinary	-0.00393304	0.0046818	0.400869	0.996075	892	163246
242	Thyrotoxicosis with or without goiter	endocrine/metabolic	-0.00222073	0.00265186	0.402353	0.997782	3233	161398
588	Disorders resulting from impaired renal function	genitourinary	-0.00280254	0.00334713	0.402426	0.997201	2127	162685
737.2	Lordosis (acquired)	musculoskeletal	0.0204379	0.0244104	0.402445	1.02065	26	165617
504.1	Idiopathic fibrosing alveolitis	respiratory	-0.00570984	0.00682925	0.403106	0.994306	663	164810
374.6	Dermatochalasis	sense organs	-0.00540751	0.00647723	0.403803	0.994607	715	164682
622.2	Mucous polyp of cervix	genitourinary	0.00523638	0.00627898	0.404306	1.00525	501	164476
715.3	Spinal enthesopathy	musculoskeletal	0.0132022	0.0158407	0.404598	1.01329	88	165782
287.31	Primary thrombocytopenia	hematopoietic	-0.00641337	0.00771413	0.40576	0.993607	429	165182
350.5	Abnormal reflex	neurological	-0.00683124	0.00823379	0.406731	0.993192	364	165184
184.2	Cancer of other female genital organs (excluding uterus and ovary)	neoplasms	-0.00654753	0.0079111	0.407875	0.993474	357	165403
724.9	Other unspecified back disorders	musculoskeletal	0.00630455	0.00763927	0.409211	1.00632	396	164349
723	Other disorders of cervical region	musculoskeletal	-0.00485329	0.00589821	0.410598	0.995158	666	164054
701.5	Abnormal granulation tissue	dermatologic	-0.00760741	0.00927251	0.411973	0.992421	279	164768
965.1	Opiates and related narcotics causing adverse effects in therapeutic use	injuries & poisonings	-0.0042715	0.00522837	0.413937	0.995738	842	162443
619.5	Noninflammatory disorders of vulva and perineum	genitourinary	-0.0039258	0.00481211	0.414605	0.996082	893	163096
704.8	Other specified diseases of hair and hair follicles	dermatologic	0.00388575	0.00476726	0.41502	1.00389	984	162193
8.5	Bacterial enteritis	infectious diseases	-0.00249688	0.00307494	0.416787	0.997506	2474	161281
70.4	Chronic hepatitis	infectious diseases	-0.00585696	0.00722594	0.417626	0.99416	444	165099
500.2	Pneumoconiosis	respiratory	0.0142154	0.0175522	0.418004	1.01432	121	165657
270.32	Paraproteinemia	endocrine/metabolic	-0.00393544	0.0048617	0.41824	0.996072	1255	164278
323.8	Encephalitis, non-infectious	neurological	0.0081316	0.0100586	0.41885	1.00816	217	165460
202.23	Lymphosarcoma	neoplasms	-0.0111938	0.0138607	0.419325	0.988869	155	165715
190	Cancer of eye	neoplasms	-0.0118968	0.014783	0.420956	0.988174	137	165733
289.3	Personal history of diseases of blood and blood-forming organs	hematopoietic	-0.00374345	0.00466377	0.422167	0.996264	1003	163687
227.2	Benign neoplasm of parathyroid gland	neoplasms	0.00678228	0.00851647	0.425816	1.00681	313	165173
643	Excessive vomiting in pregnancy	pregnancy complications	0.00314898	0.00396089	0.426602	1.00315	1024	163801
222	Benign neoplasm of male genital organs	neoplasms	-0.0197235	0.0248911	0.428132	0.98047	71	165665
250.15	Diabetes type 1 with peripheral circulatory disorders	endocrine/metabolic	-0.0128216	0.0163326	0.432436	0.98726	96	165689
264.9	Lack of normal physiological development, unspecified	endocrine/metabolic	-0.0102773	0.0130965	0.43261	0.989775	143	165727
634.3	Ectopic pregnancy	pregnancy complications	0.00399206	0.00510781	0.434473	1.004	626	165066
741.6	Villonodular synovitis	musculoskeletal	-0.0107154	0.0137272	0.43504	0.989342	144	165726
260.21	Kwashiorkor	endocrine/metabolic	-0.016944	0.0217391	0.43573	0.983199	60	165810
614.3	Pelvic inflammatory disease (PID)	genitourinary	0.00404198	0.00519217	0.436289	1.00405	635	164381
690	Erythematosquamous dermatosis	dermatologic	-0.00244861	0.00315688	0.43796	0.997554	2530	160198
626.21	Mittelschmerz	genitourinary	-0.010253	0.0132323	0.43843	0.989799	121	165749
686.5	Pyoderma	dermatologic	-0.0126007	0.0162724	0.438718	0.987478	94	165688
368.2	Diplopia and disorders of binocular vision	sense organs	-0.00338708	0.00438244	0.439596	0.996619	1405	163421
204.22	Myeloid leukemia, chronic	neoplasms	0.00769359	0.00996619	0.440133	1.00772	259	165528
474.1	Acute tonsillitis	respiratory	0.00556191	0.00720862	0.440373	1.00558	363	164706
976	Poisoning by agents primarily affecting skin & mucous membrane, ophthalmological, otorhinolaryngological, & dental drugs	injuries & poisonings	-0.0270948	0.035256	0.44218	0.973269	23	165847
246.2	Thyroid cyst	endocrine/metabolic	-0.0133648	0.0174097	0.442687	0.986724	79	165573
212	Benign neoplasm of respiratory and intrathoracic organs	neoplasms	0.00540292	0.00707314	0.444948	1.00542	511	165001
481	Influenza	respiratory	-0.00345367	0.00452226	0.445042	0.996552	1048	161762
568	Other disorders of peritoneum	digestive	-0.0033179	0.00434655	0.445261	0.996688	1256	162038
292.11	Aphasia	mental disorders	-0.00501198	0.00657537	0.44592	0.995001	603	164412
603.1	Hydrocele	genitourinary	0.00526144	0.00691257	0.446572	1.00528	625	164746
312	Conduct disorders	mental disorders	-0.00952945	0.0125276	0.44685	0.990516	142	165535
384.1	Myringitis	sense organs	-0.0134416	0.0177386	0.448595	0.986648	97	165773
772.3	Muscle weakness	symptoms	0.00285369	0.00376624	0.44863	1.00286	1674	161302
742.1	Loose body in joint	musculoskeletal	0.012444	0.016424	0.448649	1.01252	77	165676
253.5	Pituitary dwarfism	endocrine/metabolic	0.0168587	0.022281	0.449266	1.017	43	165827
281	Other deficiency anemia	hematopoietic	0.00289661	0.00382861	0.449308	1.0029	1631	162512
614.31	Acute inflammatory pelvic disease	genitourinary	-0.00851068	0.0113924	0.455035	0.991525	125	165511
204.12	Lymphoid leukemia, chronic	neoplasms	-0.00447928	0.00608652	0.461771	0.995531	911	164807
255.3	Adrenogenital disorders	endocrine/metabolic	0.00993133	0.0136587	0.467162	1.00998	112	165758
386.1	Meniere's disease	sense organs	-0.00579936	0.00797923	0.467345	0.994217	449	165293
690.1	Seborrheic dermatitis	dermatologic	-0.00229983	0.00316502	0.467447	0.997703	2511	160290
597.8	Urethral hypermobility/ISD	genitourinary	0.0076371	0.0105406	0.468734	1.00767	196	165376
728.1	Muscular calcification and ossification	musculoskeletal	0.0119704	0.0166356	0.471791	1.01204	78	165632
270.12	Phenylketonuria [PKU]	endocrine/metabolic	0.0226731	0.0315483	0.472339	1.02293	17	165853
565.1	Anal and rectal polyp	digestive	0.00258202	0.00359853	0.473052	1.00259	1859	161780
204.4	Multiple myeloma	neoplasms	-0.00349355	0.00488226	0.474263	0.996513	1269	164286
214.1	Lipoma of skin and subcutaneous tissue	neoplasms	0.00306797	0.00429879	0.475424	1.00307	1219	163396
872	Traumatic amputation	injuries & poisonings	0.00674805	0.00946174	0.475726	1.00677	263	165412
303.31	Gastrointestinal malfunction arising from mental factors	mental disorders	-0.00859936	0.0121105	0.477658	0.991438	172	165350
656.3	Endocrine and metabolic disturbances of fetus and newborn	pregnancy complications	0.0172557	0.0243819	0.479116	1.01741	27	165843
363.3	Chorioretinal scars	sense organs	-0.00945176	0.0133736	0.479725	0.990593	143	165615
362.9	Retinal edema	sense organs	0.00484226	0.00691015	0.483461	1.00485	468	165292
272.9	Unspecified disorder of lipoid metabolism	endocrine/metabolic	-0.00337179	0.00482708	0.484856	0.996634	1217	164010
246.7	Abnormal results of function study of thyroid	endocrine/metabolic	0.00290428	0.00419271	0.488498	1.00291	1343	162765
180.1	Cervical cancer	neoplasms	-0.00430092	0.00621873	0.489183	0.995708	553	165113
293	Symptoms involving head and neck	mental disorders	-0.00177366	0.00257703	0.491291	0.998228	3633	158430
743.22	Pathologic fracture of femur	musculoskeletal	-0.0163327	0.0237335	0.491347	0.9838	51	165819
527.1	Hypertrophy of salivary gland	digestive	0.0118453	0.0172588	0.492502	1.01192	72	165669
379.9	Pain, swelling or discharge of eye	sense organs	0.00380712	0.00555812	0.493366	1.00381	649	163171
381.3	Mastoiditis & related conditions	sense organs	-0.0111596	0.0164606	0.497798	0.988902	101	165590
420.22	Chronic pericarditis	circulatory system	0.00810863	0.0119644	0.497941	1.00814	189	165372
735.21	Hammer toe (acquired)	musculoskeletal	-0.00311965	0.00465526	0.502772	0.996885	1099	163800
145.3	Cancer of major salivary glands	neoplasms	-0.00744463	0.0111461	0.50419	0.992583	246	165526
446.8	Thrombotic microangiopathy	circulatory system	0.0089084	0.0133804	0.505552	1.00895	106	165764
634.1	Missed abortion/Hydatidiform mole	pregnancy complications	-0.00309308	0.00465783	0.506652	0.996912	912	164273
946	Anaphylactic shock NOS	injuries & poisonings	0.00391204	0.00592493	0.509082	1.00392	553	164646
627.21	Symptomatic artificial menopause	genitourinary	-0.00901871	0.0136631	0.509205	0.991022	127	165743
871	Open wounds of extremities	injuries & poisonings	0.00174962	0.00265705	0.510228	1.00175	3194	157602
753.1	Congenital cataract and lens anomalies	congenital anomalies	-0.0101745	0.0155473	0.512842	0.989877	99	165771
259.3	Delay in sexual development and puberty NEC	endocrine/metabolic	-0.0245567	0.0375255	0.512854	0.975742	23	165847
312.3	Impulse control disorder	mental disorders	0.00732108	0.0112009	0.513361	1.00735	160	165710
711.3	Behcet's syndrome	musculoskeletal	-0.00998599	0.0153387	0.515027	0.990064	104	165766
364.2	Corneal edema	sense organs	-0.00889639	0.0136664	0.515068	0.991143	151	165719
420.1	Myocarditis	circulatory system	-0.0062899	0.0096794	0.515807	0.99373	254	165197
578.8	Hemorrhage of rectum and anus	digestive	-0.00172905	0.00267466	0.517984	0.998272	3296	158702
426.25	Other heart block	circulatory system	0.00691679	0.0107108	0.518424	1.00694	259	165209
636.3	Hemorrhage in early pregnancy	pregnancy complications	-0.0021603	0.00334828	0.518799	0.997842	1662	162637
857	Mechanical complication of unspecified genitourinary device, implant, and graft	injuries & poisonings	-0.00283071	0.00439453	0.519481	0.997173	1091	163430
442.2	Aneurysm of iliac artery	circulatory system	0.00683482	0.0106329	0.520353	1.00686	302	165344
614.4	Inflammatory diseases of uterus, except cervix	genitourinary	0.00860056	0.0133833	0.52046	1.00864	100	165510
285.3	Sideroblastic anemia	hematopoietic	-0.0100155	0.0156465	0.522101	0.990034	98	165772
614.51	Cervicitis and endocervicitis	genitourinary	0.00428752	0.00680077	0.528402	1.0043	364	163737
223	Benign neoplasm of kidney and other urinary organs	neoplasms	0.00677043	0.0108719	0.533452	1.00679	219	165275
750.14	Congenital anomalies of esophagus	congenital anomalies	-0.00788951	0.012712	0.53484	0.992142	160	165710
1006	Crushing injury	symptoms	0.00749722	0.0120817	0.534899	1.00753	140	165525
261.1	Vitamin A deficiency	endocrine/metabolic	0.00852114	0.0137629	0.535824	1.00856	111	165659
383	Otosclerosis	sense organs	-0.00837798	0.0135569	0.536585	0.991657	153	165644
709.4	Polymyositis	dermatologic	0.00831181	0.0134524	0.536663	1.00835	116	165754
331.1	Hydrocephalus	neurological	-0.00442036	0.00717427	0.537802	0.995589	515	165072
379.1	Scleritis and episcleritis	sense organs	0.0050768	0.00827572	0.539574	1.00509	294	165440
599	Other symptoms/disorders or the urinary system	genitourinary	0.000667515	0.00109154	0.540847	1.00067	25512	124326
619.3	Noninflammatory disorders of cervix	genitourinary	-0.00349626	0.00578396	0.545528	0.99651	591	164164
202.22	Reticulosarcoma	neoplasms	-0.0034636	0.00575498	0.547278	0.996542	900	164745
614.32	Chronic inflammatory pelvic disease	genitourinary	0.0054277	0.00905464	0.548881	1.00544	206	165383
913	Toxic effect of venom	injuries & poisonings	0.00622929	0.0104634	0.551615	1.00625	198	165145
628	Ovarian cyst	genitourinary	-0.001171	0.00197969	0.55418	0.99883	5404	157348
599.9	Other abnormality of urination	genitourinary	0.00135565	0.00230785	0.556927	1.00136	4895	155861
535.1	Acute gastritis	digestive	0.00493511	0.00841271	0.557455	1.00495	326	164554
691.1	Ichthyosis congenita	dermatologic	0.00792826	0.0135525	0.558546	1.00796	121	165749
284.2	Constitutional aplastic anemia	hematopoietic	-0.0114802	0.0196684	0.559432	0.988585	74	165796
599.3	Dysuria	genitourinary	-0.00118559	0.00203208	0.559598	0.998815	5506	152883
580.13	Acute glomerulonephritis, NOS	genitourinary	0.00818977	0.0141208	0.56193	1.00822	115	165755
440.9	Atherosclerosis of aorta	circulatory system	-0.00218589	0.00381952	0.567123	0.997816	2001	160047
753	Congenital anomalies of the eye	congenital anomalies	-0.00547812	0.00967811	0.571372	0.994537	255	165299
599.6	Oliguria and anuria	genitourinary	0.00785059	0.01391	0.572494	1.00788	105	164918
376	Disorders of the orbit	sense organs	0.00413352	0.00734737	0.573718	1.00414	418	165268
369	Infection of the eye	sense organs	0.00159655	0.00284855	0.575152	1.0016	2675	158118
259.1	Nonspecific abnormal results of other endocrine function study	endocrine/metabolic	0.00682799	0.0122242	0.57646	1.00685	141	165729
8	Intestinal infection	infectious diseases	-0.00149659	0.00267952	0.576482	0.998505	3247	158466
727.8	Plica syndrome	musculoskeletal	-0.0108632	0.019646	0.580298	0.989196	63	165622
767	Cervicocranial/Cervicobrachial syndrome	symptoms	-0.0276778	0.0506882	0.585038	0.972702	10	165860
654.2	Rhesus isoimmunization in pregnancy	pregnancy complications	0.0030595	0.00560927	0.585454	1.00306	593	164912
772	Symptoms of the muscles	symptoms	-0.00121173	0.00223344	0.587445	0.998789	4744	154378
793	Nonspecific abnormal findings on radiological and other examination of musculoskeletal system	symptoms	0.00137106	0.00253229	0.588211	1.00137	4198	156461
270.1	Disturbances of amino-acid transport	endocrine/metabolic	0.00478055	0.0088386	0.588596	1.00479	323	165352
597.1	Urethral stricture (not specified as infectious)	genitourinary	-0.0045838	0.00849701	0.58957	0.995427	474	165094
189.21	Malignant neoplasm of bladder	neoplasms	0.00239331	0.00446006	0.591537	1.0024	1816	163718
598.9	Other nonspecific findings on examination of urine	genitourinary	-0.00183764	0.00344938	0.59421	0.998164	1943	160557
782.6	Pallor and flushing	symptoms	-0.00207163	0.00389013	0.594356	0.997931	1429	162716
969	Poisoning by psychotropic agents	injuries & poisonings	-0.00774732	0.0146473	0.596858	0.992283	101	165059
352.1	Trigeminal nerve disorders [CN5]	neurological	-0.00274565	0.00525929	0.601631	0.997258	888	164365
374.3	Ptosis of eyelid	sense organs	-0.00271755	0.00522053	0.60268	0.997286	967	164079
350	Abnormal movement	neurological	-0.000833631	0.00160422	0.603308	0.999167	10677	146288
989	Toxic effect of other substances, chiefly nonmedicinal as to source	injuries & poisonings	-0.00245071	0.00472994	0.60437	0.997552	950	164111
187.1	Malignant neoplasm of unspecified male genital organ	neoplasms	-0.00938675	0.0181582	0.605195	0.990657	107	165763
965.2	Antirheumatics causing adverse effects in therapeutic use	injuries & poisonings	-0.0405609	0.0787436	0.606483	0.960251	4	165866
313.1	Attention deficit hyperactivity disorder	mental disorders	0.00139164	0.00270173	0.606489	1.00139	3368	161171
755.6	Other congenital anomalies of lower limb, including pelvic girdle	congenital anomalies	0.00460509	0.00907197	0.611722	1.00462	253	165381
444.2	Embolism and thrombosis of abdominal aorta	circulatory system	-0.00974189	0.0193271	0.614223	0.990305	70	165697
364.5	Corneal dystrophy	sense organs	0.00501715	0.00996209	0.614525	1.00503	278	165421
589	Abnormal results of function study of kidney	genitourinary	-0.00595235	0.0118379	0.615091	0.994065	173	164998
333.2	Myoclonus	neurological	0.00623889	0.0124525	0.616359	1.00626	136	165487
433.1	Occlusion and stenosis of precerebral arteries	circulatory system	0.00116272	0.00232438	0.616915	1.00116	5812	155843
772.4	Rhabdomyolysis	symptoms	-0.00519663	0.0104201	0.617983	0.994817	204	165331
187.8	Neoplasm of uncertain behavior of male genital organs	neoplasms	-0.00767541	0.0154225	0.618712	0.992354	138	165552
202.24	Large cell lymphoma	neoplasms	-0.00707995	0.0142525	0.619366	0.992945	142	165667
187.2	Malignant neoplasm of testis	neoplasms	0.00371538	0.00752295	0.621396	1.00372	549	165258
189.2	Cancer of bladder	neoplasms	0.00210037	0.00425379	0.621473	1.0021	1972	163485
316	Substance addiction and disorders	mental disorders	-0.00107132	0.00217734	0.622697	0.998929	4577	157900
184.1	Malignant neoplasm of ovary and other uterine adnexa	neoplasms	-0.0023325	0.00482041	0.628471	0.99767	1011	164528
668	Complications of the administration of anesthetic or other sedation in labor and delivery	pregnancy complications	0.00881568	0.0182482	0.629026	1.00885	54	165816
289.8	Polycythemia, secondary	hematopoietic	0.00350233	0.00737946	0.635069	1.00351	512	165045
433.8	Late effects of cerebrovascular disease	circulatory system	-0.00251076	0.0052912	0.635132	0.997492	854	163824
244.5	Congenital hypothyroidism	endocrine/metabolic	0.00770363	0.0163166	0.636831	1.00773	82	165788
754.2	Spondylolisthesis, congenital	congenital anomalies	-0.00630704	0.0133696	0.637109	0.993713	146	165483
800.3	Fracture of tibia and fibula	injuries & poisonings	0.00222314	0.00472028	0.637657	1.00223	984	164413
1003	Sudden death	symptoms	-0.0124072	0.0264087	0.638488	0.987669	35	165835
681.2	Cellulitis and abscess of face/neck	dermatologic	-0.00278376	0.00595197	0.639996	0.99722	622	164029
259.8	Polyglandular activity in multiple endocrine adenomatosis	endocrine/metabolic	-0.00881807	0.0189414	0.641542	0.991221	73	165797
327.72	Sleep related leg cramps	neurological	0.00481553	0.0103478	0.641667	1.00483	249	165322
535.9	Gastritis and duodenitis, NOS	digestive	-0.00161393	0.0034888	0.64365	0.998387	1928	160958
204.3	Monocytic leukemia	neoplasms	-0.00724549	0.0157788	0.646096	0.992781	123	165747
440.21	Atherosclerosis of native arteries of the extremities with ulceration or gangrene	circulatory system	-0.00354981	0.00773844	0.646432	0.996456	442	165105
585.31	Renal dialysis	genitourinary	0.00117367	0.00259793	0.651433	1.00117	3324	159890
369.2	Eye infection, viral	sense organs	0.00281495	0.00626562	0.653238	1.00282	542	164371
287.1	Spontaneous ecchymoses	hematopoietic	-0.00551033	0.0123543	0.655579	0.994505	167	165008
785	Abdominal pain	symptoms	0.000415017	0.000933474	0.656613	1.00042	35631	113290
620.1	Dysplasia of cervix	genitourinary	-0.00452415	0.0102471	0.658847	0.995486	193	165260
381.9	Otorrhea	sense organs	0.00490341	0.011117	0.659161	1.00492	190	165323
394.3	Aortic valve disease	circulatory system	0.00548315	0.0124328	0.659198	1.0055	216	165364
346	Abnormal findings on study of brain and/or nervous system	neurological	-0.00182825	0.00416224	0.660483	0.998173	1306	162585
291.4	Specific nonpsychotic mental disorders due to brain damage	mental disorders	-0.0024499	0.00558948	0.661165	0.997553	754	164320
910	Superficial injury, infected	injuries & poisonings	-0.00694794	0.0158596	0.661321	0.993076	102	165768
698	Pruritus and related conditions	dermatologic	-0.00109671	0.00250383	0.661378	0.998904	3592	156612
446.7	Takayasu's disease	circulatory system	-0.00853026	0.0197552	0.665888	0.991506	62	165808
855	Complication of nervous system device, implant, and graft	injuries & poisonings	-0.00841395	0.0194902	0.665958	0.991621	65	165805
427.11	Paroxysmal supraventricular tachycardia	circulatory system	0.000997747	0.00231908	0.667025	1.001	4868	157918
261.3	Vitamin C deficiencies	endocrine/metabolic	0.00655868	0.0153215	0.6686	1.00658	81	165789
301.1	Schizoid personality disorder	mental disorders	-0.0074351	0.0174326	0.66974	0.992592	80	165790
446.4	Wegener's granulomatosis	circulatory system	0.00413261	0.00968963	0.669744	1.00414	261	165551
679	Complications of in utero procedures	pregnancy complications	-0.0614223	0.145312	0.67252	0.940426	1	165869
442	Other aneurysm	circulatory system	0.00094345	0.00225785	0.676054	1.00094	6283	156955
164	Cancer of intrathoracic organs	neoplasms	-0.00532222	0.0127758	0.676982	0.994692	173	165561
270.34	Alpha-1-antitrypsin deficiency	endocrine/metabolic	-0.00608664	0.0146199	0.677171	0.993932	138	165732
704	Diseases of hair and hair follicles	dermatologic	-0.000799697	0.00193105	0.678783	0.999201	6135	152759
519	Other diseases of respiratory system, not elsewhere classified	respiratory	0.000935863	0.00229321	0.683199	1.00094	4547	153897
270.31	Polyclonal hypergammaglobulinemia	endocrine/metabolic	0.00636393	0.0156536	0.68434	1.00638	91	165779
733.6	Costochondritis	musculoskeletal	-0.0049076	0.012084	0.684653	0.995104	138	165227
613.8	Other specified disorders of breast	genitourinary	-0.0021642	0.00535072	0.685868	0.997838	743	163175
681.1	Cellulitis and abscess of fingers/toes	dermatologic	0.00212541	0.00528759	0.687712	1.00213	816	162915
117.2	Coccidioidomycosis	infectious diseases	-0.0122287	0.0305263	0.688718	0.987846	34	165836
960.1	Adverse effects of antibacterials (not penicillins)	injuries & poisonings	0.00498522	0.0124952	0.689915	1.005	135	164787
586.12	Vesicoureteral reflux	genitourinary	-0.00652318	0.0164087	0.690967	0.993498	90	165696
610.3	Fibrosclerosis of breast	genitourinary	0.0134357	0.0340179	0.692872	1.01353	19	165527
478	Throat pain	respiratory	0.00154374	0.00390863	0.692876	1.00154	1369	161347
117.1	Histoplasmosis	infectious diseases	-0.00693642	0.0176023	0.693535	0.993088	93	165777
346.1	Nonspecific abnormal findings on radiological and other examination of skull and head	neurological	-0.0016343	0.00415383	0.693991	0.998367	1290	162593
789.1	Persistent vomiting	symptoms	-0.00432492	0.0109931	0.694009	0.995684	158	165712
870.4	Open wound of nose and sinus	injuries & poisonings	-0.00973772	0.0249638	0.696482	0.99031	44	165662
8.51	Intestinal e.coli	infectious diseases	-0.0107839	0.0277584	0.697652	0.989274	32	165838
519.2	Respiratory complications	respiratory	-0.00575103	0.0148472	0.6985	0.994265	118	165189
368.3	Anisometropia	sense organs	-0.00516603	0.0133539	0.698864	0.994847	133	165499
759.1	Anomalies of endocrine glands, congenital	congenital anomalies	-0.00424811	0.0111752	0.703843	0.995761	193	165571
275.2	Disorders of copper metabolism	endocrine/metabolic	-0.00575942	0.015158	0.703976	0.994257	113	165757
656.7	Conditions involving the integument and temperature regulation of fetus and newborn	pregnancy complications	0.0116473	0.0312506	0.709367	1.01172	18	165852
960.3	Poisoning by antifungal antibiotics	injuries & poisonings	-0.0853639	0.229974	0.710496	0.918178	1	165869
757	Congenital anomalies of the integument	congenital anomalies	-0.00662155	0.0178532	0.71072	0.9934	77	165454
427.4	Cardiac arrest and ventricular fibrillation	circulatory system	-0.00181594	0.00491442	0.711745	0.998186	1084	163863
706.8	Other specified diseases of sebaceous glands	dermatologic	-0.00154011	0.00416906	0.711819	0.998461	1489	160908
619.1	Noninflammatory disorders of ovary, fallopian tube, and broad ligament	genitourinary	0.00165846	0.00449524	0.712175	1.00166	940	163602
733.9	Chondromalacia	musculoskeletal	0.00534043	0.0144908	0.712471	1.00535	105	165765
384	Other disorders of tympanic membrane	sense organs	-0.00266298	0.00726731	0.714042	0.997341	497	164830
586.1	Anatomical abnormatilies of kidney and ureters	genitourinary	-0.00533081	0.0145799	0.714643	0.994683	110	165615
433.21	Cerebral artery occlusion, with cerebral infarction	circulatory system	0.000757019	0.00213636	0.723076	1.00076	5862	158073
797	Shock	symptoms	-0.00169561	0.00479517	0.723632	0.998306	1108	162349
242.1	Graves' disease	endocrine/metabolic	-0.00137429	0.00390333	0.724777	0.998627	1422	164133
281.13	Folate-deficiency anemia	hematopoietic	0.00465317	0.0133387	0.727204	1.00466	123	165747
753.2	Congenital anomalies of posterior segment of eye	congenital anomalies	0.00523606	0.0150656	0.728178	1.00525	96	165700
251.8	Abnormality of secretion of glucagon or gastrin	endocrine/metabolic	0.00597009	0.0172387	0.729104	1.00599	74	165796
286.4	Acquired coagulation factor deficiency	hematopoietic	-0.00476879	0.0137744	0.729187	0.995243	134	164753
426.24	Atrioventricular block, complete	circulatory system	0.001498	0.00432901	0.729315	1.0015	1685	163478
433.12	Cerebral atherosclerosis	circulatory system	0.0018709	0.00547828	0.732717	1.00187	798	163702
362.21	Macular degeneration, dry	sense organs	0.00317804	0.0094829	0.737524	1.00318	346	165191
295.2	Paranoid disorders	mental disorders	-0.00396892	0.0120544	0.741965	0.996039	143	165497
324.1	Jakob-Creutzfeldt disease	neurological	-0.030096	0.0921212	0.743894	0.970352	4	165866
856	Vascular complications of surgery and medical procedures	injuries & poisonings	0.00971668	0.0301795	0.747481	1.00976	28	165640
244.3	Iodine hypothyroidism	endocrine/metabolic	0.0188119	0.0584998	0.747776	1.01899	7	165863
362.23	Cystoid macular degeneration of retina	sense organs	-0.00235905	0.00738012	0.749235	0.997644	486	165213
656.4	Hemorrhage of fetus or newborn	pregnancy complications	-0.0106075	0.0332461	0.74968	0.989449	20	165850
686.4	Pyogenic granuloma	dermatologic	-0.0041936	0.0131634	0.750046	0.995815	129	165325
286.7	Other and unspecified coagulation defects	hematopoietic	0.00177167	0.00563344	0.753147	1.00177	760	162638
90.3	Venereal diseases due to Chlamydia trachomatis	infectious diseases	0.00326447	0.010551	0.757018	1.00327	129	165616
184.11	Malignant neoplasm of ovary	neoplasms	-0.00156478	0.00509682	0.758835	0.998436	902	164737
873	Broken tooth	injuries & poisonings	0.00521633	0.0170142	0.759158	1.00523	74	165500
255.22	Mineralocorticoid deficiency	endocrine/metabolic	-0.0143745	0.0470993	0.760218	0.985728	12	165858
250.5	Glycosuria or Acetonuria	endocrine/metabolic	0.00407139	0.0133449	0.760299	1.00408	107	165491
942	Infusion and transfusion reaction	injuries & poisonings	-0.0117941	0.0387856	0.761063	0.988275	16	165553
221	Benign neoplasm of other female genital organs	neoplasms	0.00324488	0.0108242	0.764345	1.00325	162	165708
656	Other perinatal conditions of fetus or newborn	pregnancy complications	0.000958162	0.00320338	0.764856	1.00096	1818	162357
958	Certain early complications of trauma or procedure	injuries & poisonings	0.00236144	0.00796737	0.766933	1.00236	367	164002
41.9	Infection with drug-resistant microorganisms	infectious diseases	-0.00304381	0.0103413	0.768501	0.996961	228	165029
275.51	Hypocalcemia	endocrine/metabolic	0.00110434	0.00378051	0.7702	1.0011	1614	161765
626.2	Dysmenorrhea	genitourinary	0.000936838	0.0032272	0.771591	1.00094	1782	162362
636.1	Threatened premature labor	pregnancy complications	-0.00312838	0.0108783	0.773667	0.996877	144	165413
656.9	Neonatal bradycardia or tachycardia	pregnancy complications	-0.0304233	0.105839	0.773768	0.970035	3	165867
471	Nasal polyps	respiratory	-0.00125167	0.0043875	0.775429	0.998749	1358	163886
368.91	Psychophysical visual disturbances	sense organs	0.00488448	0.0171599	0.775916	1.0049	77	165497
731.1	Osteitis deformans [Paget's disease of bone]	musculoskeletal	-0.00408098	0.0144956	0.778303	0.995927	130	165740
287.4	Qualitative platelet defects	hematopoietic	0.00417774	0.0148493	0.778448	1.00419	110	165622
564.8	Abnormal findings on exam of gastrointestinal tract/ abdominal area	digestive	0.000721359	0.00256534	0.778562	1.00072	3675	157688
586.11	Small kidney	genitourinary	0.00490711	0.0174912	0.779058	1.00492	75	165795
79.9	Viremia, NOS	infectious diseases	0.00115614	0.00415349	0.78074	1.00116	1195	160499
199	Neoplasm of uncertain behavior	neoplasms	0.00057922	0.00210004	0.782691	1.00058	6089	155593
170.2	Cancer of connective tissue	neoplasms	-0.00133127	0.00486071	0.784173	0.99867	1123	164364
635.3	Placenta previa and abruptio placenta	pregnancy complications	0.00225977	0.00826543	0.784546	1.00226	265	165141
656.5	Hematological disorders of newborn	pregnancy complications	-0.0118229	0.0436278	0.786394	0.988247	10	165860
735	Acquired foot deformities	musculoskeletal	-0.000594262	0.00222843	0.789721	0.999406	4782	157186
81	Infection/inflammation of internal prosthetic device; implant; and graft	infectious diseases	-0.00140187	0.00530227	0.791479	0.998599	885	164280
603.2	Spermatocele	genitourinary	-0.00276541	0.0105063	0.792386	0.997238	276	165383
580.32	Nephritis and nephropathy with pathological lesion	genitourinary	0.00115445	0.0044106	0.793519	1.00116	1174	163957
333.1	Essential tremor	neurological	0.00139069	0.00531443	0.793567	1.00139	1057	164039
741.2	Stiffness of joint	musculoskeletal	0.00125738	0.00482312	0.794325	1.00126	1025	163503
433.6	Acute, but ill-defined cerebrovascular disease	circulatory system	0.00205107	0.00790106	0.795177	1.00205	412	165177
979	Adverse drug events and drug allergies	injuries & poisonings	0.000677759	0.00261934	0.795827	1.00068	3427	157163
793.2	Nonspecific abnormal findings on radiological and other examination of other intrathoracic organs (echocardiogram, etc)	symptoms	0.00067333	0.00265693	0.799941	1.00067	3972	157264
447.7	Aortic ectasia	circulatory system	0.000887054	0.00351093	0.800535	1.00089	2578	162036
592.12	Chronic cystitis	genitourinary	0.00225861	0.00913737	0.804766	1.00226	356	164890
117.3	Blastomycotic infection	infectious diseases	-0.0117488	0.0478174	0.805913	0.98832	11	165859
384.4	Perforation of tympanic membrane	sense organs	0.00187246	0.0077559	0.809227	1.00187	427	165047
427.41	Ventricular fibrillation and flutter	circulatory system	0.00189171	0.00783666	0.80925	1.00189	424	165043
367.9	Blindness and low vision	sense organs	-0.000979283	0.00406051	0.809421	0.999021	1438	162578
275.11	Hereditary hemochromatosis	hematopoietic	-0.00280745	0.0116459	0.809503	0.997196	223	165594
656.1	Isoimmunization of fetus or newborn	pregnancy complications	0.0117694	0.0489421	0.809962	1.01184	7	165863
368.5	Color vision deficiencies	sense organs	0.00431381	0.0182278	0.812919	1.00432	68	165802
323	Encephalitis	neurological	0.00187868	0.00802499	0.814905	1.00188	359	165256
371.21	Allergic conjunctivitis	sense organs	-0.00146394	0.00638181	0.818564	0.998537	534	164323
187	Cancer of other male genital organs	neoplasms	-0.00153561	0.00672216	0.819304	0.998466	710	164900
525	Other diseases of the teeth and supporting structures	digestive	-0.000958075	0.00424281	0.821348	0.999042	1187	162420
213	Benign neoplasm of bone and articular cartilage	neoplasms	-0.00169595	0.00753119	0.821831	0.998305	429	165005
386.3	Labyrinthitis	sense organs	-0.00268741	0.0120473	0.82348	0.997316	190	165208
305.2	Eating disorder	mental disorders	-0.00103131	0.004644	0.824256	0.998969	964	164375
609	Male infertility and abnormal spermatozoa	genitourinary	0.00127742	0.00577954	0.825074	1.00128	835	164076
972.1	Cardiac rhythm regulators causing adverse effects in therapeutic use	injuries & poisonings	-0.00550083	0.024925	0.82533	0.994514	51	165819
761	Cervicalgia	symptoms	0.000328341	0.00152353	0.829367	1.00033	10357	146577
340.1	Migrain with aura	neurological	0.000643457	0.00301841	0.831189	1.00064	2328	161734
797.1	Cardiogenic shock	symptoms	0.00127436	0.00600116	0.831832	1.00128	688	164006
656.26	Transitory tachypnea or apnea of newborn	pregnancy complications	-0.0160563	0.075738	0.832109	0.984072	6	165864
379.5	Disorders of iris and ciliary body	sense organs	0.00223346	0.0106118	0.833301	1.00224	223	165397
277.8	Carnitine deficiencies	endocrine/metabolic	0.00710545	0.0350046	0.839146	1.00713	15	165855
609.11	Azoospermia and oligospermia	genitourinary	0.00258844	0.0129353	0.841397	1.00259	153	165717
259.4	Precocious sexual development and puberty NEC	endocrine/metabolic	0.00512054	0.0256809	0.841957	1.00513	34	165836
575.9	Nonspecific abnormal findings on radiological and other examination of biliary tract	digestive	-0.00140364	0.00707253	0.842683	0.998597	493	164489
174.2	Breast cancer [male]	neoplasms	-0.00278585	0.0142128	0.844603	0.997218	132	165738
870.5	Open wound of lip and mouth	injuries & poisonings	-0.00283356	0.014567	0.845769	0.99717	108	165321
624.1	Dystrophy of female genital tract	genitourinary	-0.00250254	0.0128877	0.846034	0.997501	148	165580
742.8	Articular cartilage disorder	musculoskeletal	-0.00159452	0.00832861	0.848172	0.998407	325	164721
537.1	Lesions of stomach and duodenum	digestive	-0.00179705	0.00950745	0.850081	0.998205	291	165293
716.3	Kaschin-Beck disease	musculoskeletal	0.0155107	0.0830856	0.851909	1.01563	4	165866
429.9	Cardiac complications, not elsewhere classified	circulatory system	0.00154611	0.00859417	0.85723	1.00155	388	163477
371.2	Conjunctivitis, noninfectious	sense organs	-0.00111231	0.00619749	0.857563	0.998888	567	164243
613.7	Other signs and symptoms in breast	genitourinary	0.000667179	0.00376923	0.859503	1.00067	1368	163137
350.1	Abnormal involuntary movements	neurological	-0.000410839	0.00233351	0.860247	0.999589	4585	156844
523.32	Chronic periodontitis	digestive	-0.00452734	0.0258926	0.861197	0.995483	41	165675
590	Pyelonephritis	genitourinary	0.000577204	0.00342197	0.866052	1.00058	1696	162418
300.3	Obsessive-compulsive disorders	mental disorders	-0.000877581	0.00521255	0.866301	0.999123	889	164629
701.1	Keratoderma, acquired	dermatologic	-0.00151987	0.00935639	0.870958	0.998481	285	164704
695.3	Rosacea	dermatologic	0.000491303	0.00306797	0.872771	1.00049	2824	160991
210	Benign neoplasm of lip, oral cavity, and pharynx	neoplasms	0.00113766	0.00713982	0.873401	1.00114	512	164860
975	Poisoning by agents primarily acting on the smooth and skeletal muscles and respiratory system	injuries & poisonings	0.00313106	0.0196623	0.873479	1.00314	56	165814
290.13	Senile dementia	mental disorders	0.00391139	0.0245644	0.873488	1.00392	51	165819
386.21	Central origin vertigo	sense organs	-0.00203761	0.0128011	0.873531	0.997964	146	165404
755.4	Congenital anomalies of upper limb, including shoulder girdle	congenital anomalies	0.00265043	0.0167835	0.874521	1.00265	79	165700
295.3	Psychosis	mental disorders	-0.00111873	0.00708719	0.874573	0.998882	398	164783
446	Polyarteritis nodosa and allied conditions	circulatory system	0.00075186	0.00476768	0.874694	1.00075	1099	164309
256.1	Hyperestrogenism	endocrine/metabolic	-0.00551049	0.0351871	0.875556	0.994505	20	165850
695.81	Erythema nodosum	dermatologic	0.00182186	0.0118325	0.877633	1.00182	138	165653
957	Injury to other and unspecified nerves	injuries & poisonings	-0.00286907	0.0191332	0.880802	0.997135	60	165810
366.3	Traumatic cataract	sense organs	-0.00388392	0.0262031	0.882166	0.996124	32	165838
348.4	Cerebral cysts	neurological	-0.00164376	0.0111722	0.883029	0.998358	188	165476
362.29	Macular degeneration (senile) of retina NOS	sense organs	-0.000936535	0.00641372	0.883905	0.999064	867	164633
598	Abnormal findings on examination of urine	genitourinary	-0.000567687	0.00398444	0.886704	0.999432	1444	161679
870.8	Open wound of genital organs	injuries & poisonings	-0.00276797	0.0201588	0.890787	0.997236	55	165657
710.2	Periostitis	musculoskeletal	-0.00576451	0.0421527	0.891226	0.994252	12	165858
702.4	Degenerative skin disorders	dermatologic	-0.00187496	0.0137823	0.891788	0.998127	131	165739
368.9	Subjective visual disturbances	sense organs	-0.000705678	0.00525412	0.893158	0.999295	765	163020
446.5	Giant cell arteritis	circulatory system	-0.00138376	0.0103251	0.893387	0.998617	273	165498
854	Complications of cardiac/vascular device, implant, and graft	injuries & poisonings	-0.000403643	0.00302552	0.893867	0.999596	2713	160478
282.8	Other hemoglobinopathies	hematopoietic	0.00054087	0.00424744	0.898671	1.00054	1110	164300
781.2	Abnormal posture	symptoms	-0.00173527	0.0141246	0.902222	0.998266	148	165551
663	Umbilical cord complications during labor and delivery	pregnancy complications	-0.000658087	0.00536146	0.90231	0.999342	656	162843
669	Complications of labor and delivery NEC	pregnancy complications	0.000674935	0.00552238	0.902726	1.00068	615	163252
603	Other disorders of testis	genitourinary	0.000700654	0.00576622	0.903287	1.0007	917	164263
335	Multiple sclerosis	neurological	0.000377735	0.00312702	0.903852	1.00038	2306	163221
184	Cancer of other female genital organs	neoplasms	-0.000484936	0.00409393	0.905709	0.999515	1360	164112
293.1	Swelling, mass, or lump in head and neck [Space-occupying lesion, intracranial NOS]	mental disorders	-0.000264675	0.00224967	0.906344	0.999735	4702	156098
531.4	Peptic ulcer, site unspecified	digestive	0.000530804	0.00451881	0.906491	1.00053	1243	163844
727.2	Bursitis disorders	musculoskeletal	0.00112015	0.00962641	0.907365	1.00112	259	164933
580.2	Nephrotic syndrome without mention of glomerulonephritis	genitourinary	0.000687781	0.00608122	0.909952	1.00069	646	164886
303.4	Somatoform disorder	mental disorders	0.000856676	0.00765093	0.910847	1.00086	329	165175
531.2	Gastric ulcer	digestive	-0.00044346	0.00400033	0.911731	0.999557	1545	162956
645	Late pregnancy and failed induction	pregnancy complications	0.000535033	0.00490818	0.913196	1.00054	802	163575
500	Lung disease due to external agents	respiratory	-0.00066406	0.00619695	0.914663	0.999336	730	164374
426.4	Anomalous atrioventricular excitation	circulatory system	0.000934035	0.00873336	0.914828	1.00093	317	165476
433.11	Occlusion of cerebral arteries, with cerebral infarction	circulatory system	0.000768373	0.00719353	0.914936	1.00077	542	164861
601.3	Orchitis and epididymitis	genitourinary	-0.000850331	0.0080416	0.915787	0.99915	462	164991
614.33	Pelvic inflammatory disease, NOS	genitourinary	0.000816374	0.00811517	0.919869	1.00082	277	165080
433.2	Occlusion of cerebral arteries	circulatory system	0.000200059	0.00212034	0.924829	1.0002	5973	157916
531	Peptic ulcer (excl. esophageal)	digestive	0.000250892	0.00270125	0.925999	1.00025	3534	160278
588.2	Secondary hyperparathyroidism (of renal origin)	genitourinary	0.000308667	0.00355317	0.930774	1.00031	1832	163165
687.3	Changes in skin texture	dermatologic	-0.000913186	0.0113666	0.935967	0.999087	166	165037
636	Early or threatened labor; hemorrhage in early pregnancy	pregnancy complications	-0.000198713	0.00251976	0.937142	0.999801	3011	160537
361.2	Retinoschisis and retinal cysts	sense organs	0.00128085	0.0178014	0.94264	1.00128	81	165789
657	Infections specific to the perinatal period	pregnancy complications	0.00133648	0.0203878	0.947734	1.00134	51	165819
1019	Other ill-defined and unknown causes of morbidity and mortality	symptoms	-0.000146585	0.00224691	0.947984	0.999853	5254	155843
31.1	Leprosy	infectious diseases	0.00426345	0.0658636	0.948388	1.00427	6	165864
1012	Late effect	symptoms	-0.000541939	0.00849174	0.949114	0.999458	296	164963
365.11	Primary open angle glaucoma	sense organs	-0.000309707	0.00485532	0.94914	0.99969	1150	164466
580.11	Proliferative glomerulonephritis	genitourinary	-0.000654621	0.0105759	0.950644	0.999346	201	165537
323.2	Acute (transverse) myelitis	neurological	0.00083017	0.0134417	0.950753	1.00083	121	165703
656.2	Respiratory conditions of fetus and newborn	pregnancy complications	-0.00144649	0.0235018	0.950923	0.998555	39	165831
362.22	Macular degeneration, wet	sense organs	0.000592782	0.0103793	0.954456	1.00059	317	165006
573.6	Nonspecific elevation of levels of transaminase or lactic acid dehydrogenase [LDH]	digestive	0.000226423	0.00407549	0.955695	1.00023	1482	161642
446.1	Thromboangiitis obliterans	circulatory system	0.0017582	0.0330996	0.957637	1.00176	20	165850
446.6	Polyarteritis nodosa	circulatory system	-0.000775499	0.0148393	0.958322	0.999225	111	165759
695.7	Prurigo and Lichen	dermatologic	-0.000194352	0.00398144	0.961067	0.999806	1569	162143
509.5	Respiratory arrest	respiratory	-0.000995539	0.0206724	0.96159	0.999005	62	165808
700	Corns and callosities	dermatologic	0.000252793	0.00611934	0.967048	1.00025	608	163850
980	Encounter for long-term (current) use of antibiotics	infectious diseases	-0.000239142	0.00594552	0.967916	0.999761	689	163932
304	Adjustment reaction	mental disorders	-9.18184e-05	0.00242162	0.969755	0.999908	3606	157507
513.4	Hyperventilation	respiratory	-0.000461203	0.012257	0.969984	0.999539	137	164831
733.8	Malunion and nonunion of fracture	musculoskeletal	0.000227264	0.00614181	0.970483	1.00023	630	164746
794	Abnormal results of other function studies (bladder, pancreas, placenta, spleen, etc)	symptoms	-0.000520642	0.0143685	0.971095	0.999479	135	165478
751.22	Other specified congenital anomalies of kidney	congenital anomalies	0.000292328	0.00809308	0.971186	1.00029	357	165274
229.1	Benign neoplasm of lymph nodes	neoplasms	-0.000931068	0.0257927	0.971204	0.999069	34	165836
313.2	Tics and stuttering	mental disorders	0.000434225	0.0133125	0.973979	1.00043	141	165634
320	Meningitis	neurological	-0.000201054	0.00620903	0.974168	0.999799	591	164961
537	Other disorders of stomach and duodenum	digestive	4.86061e-05	0.00204353	0.981024	1.00005	5957	154732
971	Poisoning by drugs primarily affecting the autonomic nervous system	injuries & poisonings	-0.000354661	0.0152788	0.981481	0.999645	98	165772
90.2	Gonococcal infections	infectious diseases	0.000128382	0.00697093	0.985306	1.00013	342	165217
571.81	Portal hypertension	digestive	-8.49338e-05	0.00518897	0.986941	0.999915	1015	164258
1100	Family history	symptoms	-2.97247e-05	0.00244087	0.990284	0.99997	3868	155762
751.12	Congenital anomalies of male genital organs	congenital anomalies	0.00017183	0.0147762	0.990722	1.00017	137	165631
612.3	Congenital anomalies of breast	genitourinary	0.0001466	0.0141966	0.991761	1.00015	100	165603
79.1	Varicella infection	infectious diseases	2.17868e-07	0.00356973	0.999951	1	1833	163755

## Sheet: Table S2
Supplementary Table S1. LabWAS between mean body mass index and 24 Lab measures
Lab Name	Beta	Beta SE	P
Hemoglobin A1C	0.0280469	0.000498107	1.0E-321
Glucose - fasting	0.52957	0.0553633	1.40437e-21
Glucose	0.774837	0.0108103	1.0E-321
Triglycerides	2.20987	0.035105	1.0E-321
Cholesterol - total	-0.196837	0.0178423	2.78181e-28
Cholesterol - LDL	-0.0185029	0.016576	0.264321
Cholesterol - HDL	-0.705658	0.00661903	1.0E-321
Alanine Transaminase	0.21496	0.015832	5.82069e-42
Aspartate Aminotransferase	-0.0269073	0.015018	0.0731879
Alkaline Phosphatase	0.320503	0.0167922	4.21666e-81
Gamma-Glutamyl Transferase	-0.942887	0.442941	0.0333698
Bilirubin - indirect	-0.00307622	0.000283278	1.90607e-27
Bilirubin - total	-0.00370274	0.000237042	5.9064e-55
Bilirubin - direct	-0.00132207	0.000322156	4.06862e-05
Albumin	-0.0063646	0.000166891	1.73244355865743E-316
Creatinine	0.000829916	0.000561771	0.139592
eGFR	0.000667791	0.000595604	0.262205
Erythrocyte Sedimentation Rate	0.637459	0.0181558	1.76408e-265
C-Reactive Protein	0.334297	0.0298233	4.10355e-29
Thyroid Stimulating Hormone	0.0123913	0.00160412	1.13286e-14
Creatine Kinase	0.51181	0.38885	0.188114
White Blood Cell Count	0.0605657	0.00162946	5.9306e-301
Red Blood Cell Count	0.0105501	0.000226238	1.0E-321
Platelet Count	0.832974	0.026609	2.18376e-214

## Sheet: Table S3
Supplementary Table S3. Cross-ancestry meta-analyis summary statistics for GWAS of body mass index. Results with p < 0.0001 are shown below.
CHR	BP	SNP	A1	A2	Beta	P	Q	I
16	53775211	chr16:53775211:C:T	T	C	0.510846	4.714e-28	0.6678	0
16	53768582	chr16:53768582:C:T	T	C	0.514379	5.306e-28	0.6822	0
16	53769311	chr16:53769311:G:A	A	G	0.513662	5.337e-28	0.6755	0
16	53769662	chr16:53769662:T:A	A	T	0.513482	5.48e-28	0.6753	0
16	53767042	chr16:53767042:T:C	C	T	0.507962	7.632e-28	0.6416	0
16	53772541	chr16:53772541:A:G	G	A	0.511325	1.021e-27	0.6873	0
16	53791993	chr16:53791993:G:A	A	G	0.510305	1.735e-27	0.6677	0
16	53781523	chr16:53781523:T:C	C	T	0.510666	2.089e-27	0.6884	0
16	53794154	chr16:53794154:C:T	T	C	0.502652	3.234e-27	0.6038	0
16	53777876	chr16:53777876:A:G	G	A	0.507119	3.347e-27	0.6807	0
16	53788475	chr16:53788475:C:T	T	C	0.507841	3.505e-27	0.6546	0
16	53789815	chr16:53789815:T:C	C	T	0.50754	4.41e-27	0.6495	0
16	53787213	chr16:53787213:A:G	G	A	0.506697	4.506e-27	0.6493	0
16	53784548	chr16:53784548:G:T	T	G	0.500472	7.205e-27	0.6033	0
16	53794050	chr16:53794050:A:G	G	A	0.504224	8.131e-27	0.6143	0
16	53793567	chr16:53793567:A:G	G	A	0.503801	8.852e-27	0.614	0
16	53790314	chr16:53790314:A:G	G	A	0.480696	2.122e-25	0.1983	33.47
16	53808996	chr16:53808996:G:A	A	G	0.480758	4.017e-25	0.7725	0
16	53797442	chr16:53797442:C:T	T	C	0.47983	1.056e-24	0.7382	0
16	53780451	chr16:53780451:G:T	T	G	0.452985	1.344e-24	0.0614	55.49
16	53796143	chr16:53796143:C:G	G	C	0.480016	1.398e-24	0.7009	0
16	53803232	chr16:53803232:G:T	T	G	0.478778	1.671e-24	0.6873	0
16	53806613	chr16:53806613:C:G	G	C	0.47822	1.865e-24	0.6913	0
16	53782363	chr16:53782363:C:A	A	C	0.447502	1.905e-24	0.0534	57.11
16	53782926	chr16:53782926:G:A	A	G	0.450502	2.125e-24	0.0532	57.15
16	53782840	chr16:53782840:A:G	G	A	0.450375	2.148e-24	0.0533	57.14
16	53800696	chr16:53800696:G:A	A	G	0.477227	2.316e-24	0.6796	0
16	53803430	chr16:53803430:A:G	G	A	0.475986	2.644e-24	0.6734	0
16	53779538	chr16:53779538:A:T	T	A	0.44961	2.822e-24	0.0809	51.87
16	53800695	chr16:53800695:T:C	C	T	0.474245	3.571e-24	0.736	0
16	53776774	chr16:53776774:T:C	C	T	0.448205	3.825e-24	0.0747	52.98
16	53792116	chr16:53792116:T:C	C	T	0.459006	4.216e-24	0.3441	10.85
16	53777031	chr16:53777031:C:T	T	C	0.443467	5.364e-24	0.0707	53.72
16	53778521	chr16:53778521:T:C	C	T	0.446031	6.683e-24	0.0913	50.04
16	53811257	chr16:53811257:T:G	G	T	0.465242	7.252e-24	0.4908	0
16	53776634	chr16:53776634:C:A	A	C	0.445711	7.395e-24	0.0666	54.49
16	53791576	chr16:53791576:C:T	T	C	0.454382	1.04e-23	0.3574	8.61
16	53779455	chr16:53779455:T:G	G	T	0.441154	1.128e-23	0.0594	55.9
16	53793267	chr16:53793267:C:G	G	C	0.457298	1.396e-23	0.2836	20.58
16	53766288	chr16:53766288:C:T	T	C	0.432237	7.001e-23	0.1277	44.14
16	53766717	chr16:53766717:C:G	G	C	0.431458	8.315e-23	0.1275	44.16
16	53769275	chr16:53769275:A:T	T	A	0.431328	8.553e-23	0.1143	46.26
16	53766073	chr16:53766073:T:A	A	T	0.431328	8.555e-23	0.1301	43.76
16	53766656	chr16:53766656:G:A	A	G	0.430613	9.95e-23	0.1164	45.91
16	53767431	chr16:53767431:C:A	A	C	0.430288	1.082e-22	0.1161	45.96
16	53768073	chr16:53768073:C:T	T	C	0.430028	1.17e-22	0.0945	49.5
16	53767637	chr16:53767637:C:T	T	C	0.429572	1.307e-22	0.1025	48.16
16	53771295	chr16:53771295:C:A	A	C	0.429507	1.354e-22	0.1344	43.08
16	53775335	chr16:53775335:G:A	A	G	0.425006	1.519e-22	0.0928	49.79
16	53788230	chr16:53788230:C:A	A	C	0.431003	1.533e-22	0.01	69.89
16	53766842	chr16:53766842:G:A	A	G	0.425333	1.63e-22	0.0992	48.71
16	53765935	chr16:53765935:G:A	A	G	0.428661	1.647e-22	0.1328	43.34
16	53788590	chr16:53788590:T:G	G	T	0.430678	1.659e-22	0.0089	70.49
16	53787385	chr16:53787385:T:C	C	T	0.430548	1.699e-22	0.0086	70.62
16	53765367	chr16:53765367:G:T	T	G	0.428986	1.717e-22	0.1204	45.27
16	53788271	chr16:53788271:C:T	T	C	0.430288	1.781e-22	0.0092	70.31
16	53788528	chr16:53788528:G:A	A	G	0.430353	1.793e-22	0.009	70.39
16	53788325	chr16:53788325:A:G	G	A	0.430288	1.809e-22	0.0091	70.37
16	53788327	chr16:53788327:A:G	G	A	0.430223	1.828e-22	0.0091	70.34
16	53788739	chr16:53788739:A:G	G	A	0.426835	1.84e-22	0.0089	70.47
16	53765993	chr16:53765993:A:G	G	A	0.428139	1.873e-22	0.1359	42.85
16	53787703	chr16:53787703:A:G	G	A	0.426639	1.892e-22	0.0084	70.77
16	53786025	chr16:53786025:A:T	T	A	0.429767	2.004e-22	0.0086	70.66
16	53785286	chr16:53785286:G:C	C	G	0.429637	2.052e-22	0.0082	70.88
16	53785965	chr16:53785965:C:T	T	C	0.429637	2.054e-22	0.0085	70.68
16	53766065	chr16:53766065:T:G	G	T	0.427553	2.087e-22	0.0906	50.16
16	53787778	chr16:53787778:A:G	G	A	0.429442	2.146e-22	0.0078	71.1
16	53784812	chr16:53784812:G:A	A	G	0.429377	2.188e-22	0.0085	70.68
16	53785455	chr16:53785455:G:A	A	G	0.429377	2.19e-22	0.0086	70.64
16	53785981	chr16:53785981:A:G	G	A	0.425986	2.216e-22	0.0082	70.87
16	53786154	chr16:53786154:T:C	C	T	0.429182	2.292e-22	0.0081	70.92
16	53785859	chr16:53785859:G:A	A	G	0.429051	2.375e-22	0.0086	70.66
16	53786591	chr16:53786591:G:A	A	G	0.429051	2.393e-22	0.0082	70.85
16	53786615	chr16:53786615:T:A	A	T	0.428986	2.426e-22	0.0079	71.07
16	53784922	chr16:53784922:A:G	G	A	0.428726	2.536e-22	0.008	71.01
16	53785257	chr16:53785257:T:C	C	T	0.424549	3.037e-22	0.0085	70.67
16	53765595	chr16:53765595:G:A	A	G	0.425529	3.532e-22	0.1091	47.09
16	53796540	chr16:53796540:A:G	G	A	0.433599	8.634e-22	0.2704	22.62
16	53796579	chr16:53796579:T:C	C	T	0.433404	8.972e-22	0.2679	22.99
16	53796955	chr16:53796955:T:A	A	T	0.43334	9.192e-22	0.2715	22.45
16	53797234	chr16:53797234:C:T	T	C	0.432951	1.024e-21	0.2576	24.56
16	53796553	chr16:53796553:A:G	G	A	0.429051	1.082e-21	0.2449	26.5
16	53797859	chr16:53797859:G:T	T	G	0.434959	1.241e-21	0.3088	16.6
16	53764407	chr16:53764407:G:A	A	G	0.42101	1.423e-21	0.5062	0
16	53764710	chr16:53764710:G:T	T	G	0.416075	2.528e-21	0.325	13.99
16	53787950	chr16:53787950:C:T	T	C	0.408859	1.254e-20	0.0257	63.91
16	53789966	chr16:53789966:T:C	C	T	0.426313	1.312e-20	0.3573	8.63
16	53790078	chr16:53790078:C:T	T	C	0.424876	1.736e-20	0.3645	7.4
16	53790095	chr16:53790095:G:A	A	G	0.424876	1.751e-20	0.3628	7.68
16	53786901	chr16:53786901:A:G	G	A	0.405132	2.685e-20	0.0154	67.43
16	53787501	chr16:53787501:T:C	C	T	0.401926	2.721e-20	0.0153	67.46
16	53784255	chr16:53784255:T:C	C	T	0.404798	2.889e-20	0.0213	65.26
16	53784901	chr16:53784901:A:G	G	A	0.403797	3.522e-20	0.0162	67.09
16	53811575	chr16:53811575:C:A	A	C	0.431003	7.1e-20	0.8629	0
16	53773852	chr16:53773852:A:G	G	A	0.356905	3.842e-16	0.1236	44.78
16	53764611	chr16:53764611:G:A	A	G	0.356345	6.54e-16	0.3396	11.59
16	53772368	chr16:53772368:C:G	G	C	0.360328	6.54e-16	0.4915	0
16	53771053	chr16:53771053:T:C	C	T	0.360398	6.643e-16	0.5136	0
16	53770428	chr16:53770428:C:T	T	C	0.356205	1.228e-15	0.4039	0.38
16	53778702	chr16:53778702:G:A	A	G	0.354663	1.468e-15	0.6355	0
16	53769244	chr16:53769244:G:A	A	G	0.355154	1.489e-15	0.3915	2.64
16	53784796	chr16:53784796:G:T	T	G	0.344795	4.128e-15	0.0642	54.94
16	53781249	chr16:53781249:T:G	G	T	0.347059	6.355e-15	0.4013	0.86
16	53763996	chr16:53763996:C:G	G	C	0.342738	1.306e-14	0.2074	32.1
2	614210	chr2:614210:A:G	G	A	0.448844	2.311e-14	0.3246	14.07
2	615627	chr2:615627:C:T	T	C	0.418513	3.924e-14	0.4413	0
2	614168	chr2:614168:A:G	G	A	0.415811	4.57e-14	0.4722	0
2	615140	chr2:615140:T:C	C	T	0.443467	4.849e-14	0.3388	11.74
2	632609	chr2:632609:A:G	G	A	0.423109	3.593e-13	0.4476	0
2	621910	chr2:621910:A:C	C	A	0.414821	1.001e-12	0.3769	5.24
2	621954	chr2:621954:T:C	C	T	0.414028	1.027e-12	0.4344	0
2	621558	chr2:621558:C:T	T	C	0.414293	1.054e-12	0.3215	14.56
2	629694	chr2:629694:T:A	A	T	0.414755	1.176e-12	0.4486	0
2	633063	chr2:633063:G:A	A	G	0.414887	1.177e-12	0.4381	0
2	631255	chr2:631255:T:C	C	T	0.414689	1.186e-12	0.4456	0
2	630034	chr2:630034:A:T	T	A	0.414623	1.193e-12	0.4478	0
2	630782	chr2:630782:G:A	A	G	0.414623	1.195e-12	0.4462	0
2	630024	chr2:630024:A:C	C	A	0.414623	1.196e-12	0.4477	0
2	631528	chr2:631528:A:G	G	A	0.414557	1.197e-12	0.4478	0
2	630662	chr2:630662:A:C	C	A	0.414359	1.225e-12	0.448	0
2	631606	chr2:631606:A:G	G	A	0.414359	1.226e-12	0.4468	0
2	630788	chr2:630788:A:G	G	A	0.414359	1.229e-12	0.4453	0
2	631603	chr2:631603:C:T	T	C	0.414359	1.237e-12	0.4478	0
2	631069	chr2:631069:G:A	A	G	0.414359	1.24e-12	0.4487	0
2	629818	chr2:629818:A:T	T	A	0.414293	1.241e-12	0.4471	0
2	629831	chr2:629831:T:C	C	T	0.414293	1.241e-12	0.4473	0
2	630323	chr2:630323:C:A	A	C	0.414227	1.242e-12	0.4475	0
2	631462	chr2:631462:G:A	A	G	0.414293	1.248e-12	0.4474	0
2	629601	chr2:629601:A:G	G	A	0.414227	1.251e-12	0.4474	0
2	630902	chr2:630902:A:T	T	A	0.414161	1.256e-12	0.4474	0
2	630903	chr2:630903:A:G	G	A	0.414161	1.256e-12	0.4474	0
2	632028	chr2:632028:C:T	T	C	0.414028	1.275e-12	0.4471	0
2	632101	chr2:632101:C:T	T	C	0.414028	1.279e-12	0.4471	0
2	629510	chr2:629510:C:A	A	C	0.414094	1.283e-12	0.4472	0
2	630995	chr2:630995:T:G	G	T	0.414028	1.291e-12	0.4472	0
2	632591	chr2:632591:T:C	C	T	0.414028	1.291e-12	0.4351	0
2	632592	chr2:632592:G:A	A	G	0.414028	1.293e-12	0.4351	0
2	630509	chr2:630509:T:C	C	T	0.413962	1.31e-12	0.4472	0
2	631335	chr2:631335:G:T	T	G	0.413896	1.312e-12	0.4481	0
2	630569	chr2:630569:T:C	C	T	0.41383	1.314e-12	0.4462	0
2	629881	chr2:629881:T:C	C	T	0.413764	1.32e-12	0.4475	0
2	631759	chr2:631759:G:A	A	G	0.41383	1.321e-12	0.4467	0
2	631183	chr2:631183:C:A	A	C	0.413632	1.34e-12	0.4481	0
2	631096	chr2:631096:G:A	A	G	0.413764	1.351e-12	0.4446	0
2	633661	chr2:633661:A:G	G	A	0.413632	1.351e-12	0.4346	0
2	629959	chr2:629959:T:C	C	T	0.413632	1.353e-12	0.4461	0
2	632300	chr2:632300:G:T	T	G	0.413632	1.357e-12	0.4346	0
2	630075	chr2:630075:C:T	T	C	0.413235	1.36e-12	0.4466	0
2	630436	chr2:630436:C:A	A	C	0.413566	1.363e-12	0.446	0
2	629817	chr2:629817:G:C	C	G	0.413499	1.366e-12	0.4463	0
2	631099	chr2:631099:C:G	G	C	0.413698	1.368e-12	0.4447	0
2	632536	chr2:632536:A:G	G	A	0.413566	1.368e-12	0.4344	0
2	632529	chr2:632529:T:C	C	T	0.413499	1.38e-12	0.434	0
2	630224	chr2:630224:A:T	T	A	0.413499	1.384e-12	0.4463	0
2	633660	chr2:633660:C:T	T	C	0.413433	1.388e-12	0.4343	0
2	634476	chr2:634476:G:C	C	G	0.413433	1.388e-12	0.4343	0
2	635154	chr2:635154:G:A	A	G	0.413433	1.388e-12	0.4343	0
2	633659	chr2:633659:T:C	C	T	0.413433	1.389e-12	0.4343	0
2	621461	chr2:621461:A:C	C	A	0.412308	1.392e-12	0.3491	10.01
2	632379	chr2:632379:T:G	G	T	0.413367	1.404e-12	0.4348	0
2	632348	chr2:632348:A:G	G	A	0.413301	1.405e-12	0.4341	0
2	632808	chr2:632808:G:T	T	G	0.413367	1.408e-12	0.4356	0
2	632550	chr2:632550:C:T	T	C	0.413301	1.413e-12	0.434	0
2	635864	chr2:635864:A:G	G	A	0.413301	1.413e-12	0.434	0
2	635866	chr2:635866:A:G	G	A	0.413301	1.414e-12	0.4339	0
2	635721	chr2:635721:T:C	C	T	0.413235	1.432e-12	0.4337	0
2	635857	chr2:635857:C:A	A	C	0.413169	1.438e-12	0.4338	0
2	624034	chr2:624034:G:C	C	G	0.411911	1.449e-12	0.3269	13.69
2	632760	chr2:632760:T:C	C	T	0.413036	1.455e-12	0.4335	0
2	623212	chr2:623212:T:C	C	T	0.411646	1.46e-12	0.3243	14.12
2	632922	chr2:632922:G:A	A	G	0.41297	1.472e-12	0.4319	0
2	632925	chr2:632925:A:G	G	A	0.41297	1.472e-12	0.4319	0
2	635200	chr2:635200:G:A	A	G	0.41297	1.472e-12	0.4336	0
2	629914	chr2:629914:G:A	A	G	0.41297	1.473e-12	0.4458	0
2	632146	chr2:632146:T:A	A	T	0.41297	1.482e-12	0.4337	0
2	624581	chr2:624581:A:C	C	A	0.411513	1.507e-12	0.3275	13.59
2	625029	chr2:625029:C:T	T	C	0.41158	1.516e-12	0.3251	13.99
2	624524	chr2:624524:G:C	C	G	0.411513	1.517e-12	0.3275	13.6
2	632904	chr2:632904:A:G	G	A	0.412705	1.523e-12	0.4268	0
2	624084	chr2:624084:G:A	A	G	0.411381	1.53e-12	0.3276	13.58
2	625057	chr2:625057:C:T	T	C	0.411447	1.539e-12	0.3255	13.92
2	624210	chr2:624210:G:A	A	G	0.411315	1.544e-12	0.3269	13.69
2	623216	chr2:623216:G:A	A	G	0.411182	1.547e-12	0.3301	13.16
2	623224	chr2:623224:C:T	T	C	0.411182	1.547e-12	0.3301	13.16
2	623798	chr2:623798:T:C	C	T	0.411315	1.549e-12	0.3274	13.61
2	623740	chr2:623740:A:G	G	A	0.411315	1.554e-12	0.3275	13.6
2	623935	chr2:623935:C:T	T	C	0.411182	1.573e-12	0.3274	13.61
2	622723	chr2:622723:A:G	G	A	0.411116	1.578e-12	0.3285	13.42
2	622857	chr2:622857:A:G	G	A	0.411049	1.592e-12	0.3281	13.5
2	623691	chr2:623691:G:A	A	G	0.411049	1.606e-12	0.328	13.52
2	630070	chr2:630070:T:C	C	T	0.411315	1.73e-12	0.4444	0
2	622388	chr2:622388:G:C	C	G	0.410121	1.792e-12	0.3223	14.44
2	636017	chr2:636017:C:T	T	C	0.410917	1.853e-12	0.4325	0
2	634905	chr2:634905:T:C	C	T	0.407995	2.26e-12	0.4495	0
2	623976	chr2:623976:T:C	C	T	0.406798	2.28e-12	0.3426	11.11
2	624678	chr2:624678:G:A	A	G	0.406798	2.28e-12	0.3425	11.11
2	632723	chr2:632723:C:T	T	C	0.409258	2.296e-12	0.4158	0
2	622827	chr2:622827:T:C	C	T	0.406531	2.346e-12	0.3442	10.84
2	622225	chr2:622225:T:G	G	T	0.407197	2.456e-12	0.3758	5.42
2	622161	chr2:622161:G:C	C	G	0.407064	2.493e-12	0.3953	1.96
2	638918	chr2:638918:A:C	C	A	0.407397	2.867e-12	0.4568	0
16	53805223	chr16:53805223:T:C	C	T	0.311008	2.906e-12	0.4053	0.13
2	630555	chr2:630555:A:G	G	A	0.406664	2.967e-12	0.4949	0
2	639060	chr2:639060:T:A	A	T	0.407064	2.996e-12	0.4562	0
2	639061	chr2:639061:T:G	G	T	0.406864	3.063e-12	0.4569	0
2	639055	chr2:639055:T:C	C	T	0.406465	3.158e-12	0.4554	0
2	637498	chr2:637498:C:A	A	C	0.405932	3.314e-12	0.4331	0
2	637508	chr2:637508:T:C	C	T	0.405798	3.358e-12	0.4332	0
16	53814649	chr16:53814649:A:G	G	A	0.334327	3.62e-12	0.1509	40.56
2	642467	chr2:642467:A:G	G	A	0.405932	3.723e-12	0.4497	0
2	638560	chr2:638560:T:C	C	T	0.404531	3.934e-12	0.4524	0
2	638566	chr2:638566:C:G	G	C	0.404465	3.95e-12	0.4524	0
2	638190	chr2:638190:A:G	G	A	0.404264	4.014e-12	0.4519	0
2	622531	chr2:622531:C:T	T	C	0.405865	4.018e-12	0.373	5.92
2	624205	chr2:624205:T:G	G	T	0.405932	4.019e-12	0.3692	6.59
2	637597	chr2:637597:C:T	T	C	0.403797	4.247e-12	0.4304	0
2	637830	chr2:637830:A:G	G	A	0.403797	4.257e-12	0.4307	0
2	625347	chr2:625347:T:C	C	T	0.405198	4.497e-12	0.3653	7.26
2	653874	chr2:653874:C:T	T	C	-0.400627	5.048e-12	0.4	1.11
2	638107	chr2:638107:G:A	A	G	0.400988	5.688e-12	0.4451	0
2	636929	chr2:636929:C:A	A	C	0.397567	6.446e-12	0.3703	6.39
2	650980	chr2:650980:G:A	A	G	-0.399732	7.033e-12	0.46	0
2	621185	chr2:621185:T:C	C	T	0.40139	7.462e-12	0.2277	29.08
2	636819	chr2:636819:C:A	A	C	-0.399135	9.433e-12	0.4046	0.26
2	653354	chr2:653354:G:A	A	G	-0.377023	1.313e-11	0.2626	23.81
2	636790	chr2:636790:T:C	C	T	-0.395861	1.346e-11	0.4046	0.26
2	652272	chr2:652272:G:A	A	G	-0.392006	1.658e-11	0.4391	0
16	53782735	chr16:53782735:G:C	C	G	0.319108	2.094e-11	0.2994	18.1
2	630113	chr2:630113:C:T	T	C	0.387844	2.114e-11	0.9134	0
2	653195	chr2:653195:G:A	A	G	-0.371499	2.208e-11	0.2324	28.38
16	53766475	chr16:53766475:A:G	G	A	0.315759	2.366e-11	0.336	12.19
2	629244	chr2:629244:A:C	C	A	0.368939	2.529e-11	0.1342	43.12
2	652576	chr2:652576:C:A	A	C	0.355154	3.288e-11	0.1146	46.2
2	628749	chr2:628749:C:T	T	C	0.361165	3.524e-11	0.1507	40.59
2	630339	chr2:630339:A:C	C	A	0.368179	3.657e-11	0.0985	48.83
2	649867	chr2:649867:A:T	T	A	-0.365427	3.696e-11	0.1381	42.52
2	649638	chr2:649638:C:T	T	C	-0.370774	4.311e-11	0.183	35.74
2	620297	chr2:620297:A:G	G	A	0.364435	4.932e-11	0.1823	35.84
2	646803	chr2:646803:T:C	C	T	0.369907	5.424e-11	0.1483	40.96
2	643315	chr2:643315:T:C	C	T	0.369631	5.606e-11	0.1445	41.53
2	610603	chr2:610603:T:C	C	T	0.387165	5.918e-11	0.1538	40.12
2	651507	chr2:651507:T:C	C	T	-0.359966	6.829e-11	0.1315	43.54
2	651430	chr2:651430:T:C	C	T	-0.359823	6.965e-11	0.1322	43.44
2	652542	chr2:652542:T:C	C	T	-0.359823	6.97e-11	0.1322	43.43
2	652565	chr2:652565:A:G	G	A	-0.359823	7.01e-11	0.1322	43.42
2	652607	chr2:652607:T:C	C	T	-0.359393	7.393e-11	0.1314	43.55
2	651482	chr2:651482:T:G	G	T	-0.35925	7.428e-11	0.1289	43.94
2	651483	chr2:651483:G:A	A	G	-0.35925	7.428e-11	0.1289	43.94
1	177919890	chr1:177919890:A:C	C	A	0.363392	9.022e-11	0.7045	0
2	653575	chr2:653575:C:T	T	C	-0.361257	1.004e-10	0.1498	40.73
2	653245	chr2:653245:A:C	C	A	-0.35539	1.044e-10	0.1098	46.97
2	653250	chr2:653250:A:G	G	A	-0.35539	1.045e-10	0.1097	46.99
2	653093	chr2:653093:T:C	C	T	-0.354677	1.178e-10	0.1431	41.75
2	650012	chr2:650012:G:A	A	G	-0.357247	1.323e-10	0.1044	47.85
2	651407	chr2:651407:T:C	C	T	-0.357104	1.333e-10	0.0806	51.92
1	177920345	chr1:177920345:A:G	G	A	0.358583	1.348e-10	0.7032	0
2	651290	chr2:651290:A:G	G	A	-0.356961	1.352e-10	0.0813	51.78
2	651349	chr2:651349:T:G	G	T	-0.356961	1.357e-10	0.0808	51.87
2	651365	chr2:651365:G:A	A	G	-0.356961	1.361e-10	0.0804	51.95
2	651382	chr2:651382:T:C	C	T	-0.356818	1.37e-10	0.0802	51.98
2	651380	chr2:651380:C:T	T	C	-0.356818	1.388e-10	0.0799	52.04
2	648758	chr2:648758:T:C	C	T	0.355785	1.592e-10	0.1402	42.19
2	651286	chr2:651286:A:C	C	A	-0.35539	1.625e-10	0.0813	51.78
2	653581	chr2:653581:G:A	A	G	-0.353395	1.666e-10	0.0895	50.35
2	639900	chr2:639900:C:T	T	C	0.356135	1.731e-10	0.0734	53.2
2	650560	chr2:650560:G:C	C	G	-0.354677	1.74e-10	0.0888	50.48
2	642499	chr2:642499:C:G	G	C	0.355785	1.837e-10	0.0654	54.72
2	642846	chr2:642846:G:A	A	G	0.355574	1.876e-10	0.0686	54.11
2	650479	chr2:650479:G:C	C	G	-0.353822	1.922e-10	0.083	51.48
2	648810	chr2:648810:A:G	G	A	-0.353679	1.959e-10	0.089	50.45
2	642253	chr2:642253:T:C	C	T	0.355224	1.963e-10	0.0654	54.71
2	650143	chr2:650143:T:C	C	T	-0.353679	1.968e-10	0.0904	50.2
2	651030	chr2:651030:T:G	G	T	-0.353537	1.971e-10	0.0892	50.41
2	646767	chr2:646767:G:A	A	G	0.354733	1.997e-10	0.0655	54.71
2	650974	chr2:650974:G:T	T	G	-0.353537	2.006e-10	0.0894	50.38
2	651105	chr2:651105:G:C	C	G	-0.353395	2.034e-10	0.0897	50.32
2	641082	chr2:641082:A:T	T	A	0.354873	2.042e-10	0.066	54.61
2	646839	chr2:646839:T:G	G	T	0.354452	2.06e-10	0.0645	54.9
2	650973	chr2:650973:T:C	C	T	-0.353252	2.068e-10	0.0895	50.35
2	650828	chr2:650828:G:A	A	G	-0.353252	2.07e-10	0.0882	50.58
2	646849	chr2:646849:T:C	C	T	0.354452	2.072e-10	0.0647	54.86
2	650647	chr2:650647:A:G	G	A	-0.353252	2.085e-10	0.0877	50.66
2	646061	chr2:646061:T:C	C	T	0.354242	2.118e-10	0.0642	54.94
2	649347	chr2:649347:T:G	G	T	-0.352968	2.12e-10	0.0897	50.32
2	641863	chr2:641863:T:A	A	T	0.354593	2.123e-10	0.0671	54.39
2	647760	chr2:647760:A:G	G	A	0.341104	2.182e-10	0.0523	57.35
2	645122	chr2:645122:C:G	G	C	0.353961	2.194e-10	0.062	55.38
2	646145	chr2:646145:T:C	C	T	0.353961	2.195e-10	0.062	55.37
2	645203	chr2:645203:C:T	T	C	0.353961	2.196e-10	0.0628	55.22
2	646364	chr2:646364:T:A	A	T	0.353891	2.201e-10	0.062	55.38
2	645646	chr2:645646:C:T	T	C	0.353891	2.207e-10	0.062	55.38
2	641159	chr2:641159:A:C	C	A	0.354172	2.219e-10	0.0654	54.72
2	646110	chr2:646110:C:T	T	C	0.353821	2.227e-10	0.0618	55.42
2	643303	chr2:643303:C:G	G	C	0.35368	2.256e-10	0.0617	55.44
2	628504	chr2:628504:A:G	G	A	0.35129	2.257e-10	0.0704	53.77
2	638144	chr2:638144:G:T	T	G	0.35361	2.269e-10	0.0749	52.94
2	646081	chr2:646081:C:T	T	C	0.35368	2.269e-10	0.0619	55.39
2	652247	chr2:652247:G:A	A	G	-0.349416	2.271e-10	0.1871	35.13
2	647580	chr2:647580:T:C	C	T	0.340678	2.283e-10	0.0568	56.42
2	640701	chr2:640701:A:G	G	A	0.353821	2.314e-10	0.0667	54.47
2	643469	chr2:643469:T:C	C	T	0.35354	2.328e-10	0.062	55.39
2	645372	chr2:645372:T:G	G	T	0.3534	2.335e-10	0.0623	55.32
2	643428	chr2:643428:C:A	A	C	0.35347	2.34e-10	0.062	55.38
1	177925152	chr1:177925152:T:C	C	T	0.353821	2.493e-10	0.6576	0
2	641718	chr2:641718:T:G	G	T	0.352767	2.508e-10	0.0597	55.83
2	628524	chr2:628524:A:G	G	A	0.350305	2.608e-10	0.0623	55.32
1	177925456	chr1:177925456:T:G	G	T	0.353329	2.642e-10	0.6576	0
2	645082	chr2:645082:T:C	C	T	0.352275	2.659e-10	0.0529	57.23
2	647861	chr2:647861:T:C	C	T	0.339325	2.694e-10	0.0536	57.07
2	650519	chr2:650519:A:G	G	A	-0.350125	2.885e-10	0.0869	50.8
2	643320	chr2:643320:G:A	A	G	0.350657	3.263e-10	0.0621	55.36
11	27658369	chr11:27658369:C:T	T	C	-0.366148	3.358e-10	0.5891	0
2	646345	chr2:646345:G:A	A	G	0.348754	3.437e-10	0.0636	55.07
16	53789806	chr16:53789806:G:A	A	G	0.308146	3.493e-10	0.258	24.51
2	646674	chr2:646674:T:C	C	T	0.348471	3.564e-10	0.0668	54.45
2	647577	chr2:647577:A:G	G	A	0.335686	3.591e-10	0.0591	55.96
16	53774346	chr16:53774346:A:G	G	A	0.306013	4.239e-10	0.2039	32.62
2	605176	chr2:605176:T:A	A	T	0.363114	5.61e-10	0.0449	58.97
2	644953	chr2:644953:A:G	G	A	0.341744	6.029e-10	0.0717	53.53
2	648198	chr2:648198:C:T	T	C	0.330167	6.107e-10	0.2019	32.92
16	53794840	chr16:53794840:A:G	G	A	0.29252	8.361e-10	0.2811	20.97
16	30867542	chr16:30867542:C:T	T	C	-0.301375	1.391e-09	0.4423	0
11	27672694	chr11:27672694:G:C	C	G	-0.367447	2.439e-09	0.5953	0
4	45177866	chr4:45177866:C:T	T	C	0.269722	2.474e-09	0.3229	14.35
11	27656036	chr11:27656036:C:A	A	C	-0.328365	3.036e-09	0.7214	0
11	27656039	chr11:27656039:G:T	T	G	-0.328226	3.121e-09	0.7212	0
11	27682662	chr11:27682662:G:A	A	G	-0.324623	3.247e-09	0.5942	0
11	27684493	chr11:27684493:T:C	C	T	-0.324208	3.378e-09	0.5974	0
11	27685485	chr11:27685485:G:A	A	G	-0.324208	3.386e-09	0.5985	0
11	27685018	chr11:27685018:C:A	A	C	-0.324069	3.423e-09	0.5981	0
11	27687416	chr11:27687416:A:G	G	A	-0.324069	3.425e-09	0.5988	0
2	655222	chr2:655222:G:A	A	G	-0.373676	3.6e-09	0.1065	47.52
1	177929986	chr1:177929986:G:C	C	G	0.329735	4.003e-09	0.7995	0
4	45179317	chr4:45179317:A:T	T	A	0.265666	4.229e-09	0.352	9.52
16	53807265	chr16:53807265:A:G	G	A	0.29267	4.305e-09	0.6846	0
4	45180510	chr4:45180510:A:G	G	A	0.265283	4.361e-09	0.3597	8.22
11	27645437	chr11:27645437:T:A	A	T	-0.322826	5.242e-09	0.6845	0
1	177917883	chr1:177917883:T:C	C	T	0.312033	5.256e-09	0.6712	0
11	27645820	chr11:27645820:G:T	T	G	-0.32255	5.567e-09	0.6866	0
11	27650953	chr11:27650953:A:G	G	A	-0.321998	5.696e-09	0.6915	0
11	27662071	chr11:27662071:C:T	T	C	-0.324484	5.764e-09	0.6266	0
11	27648561	chr11:27648561:T:C	C	T	-0.320756	5.877e-09	0.6967	0
11	27646808	chr11:27646808:G:C	C	G	-0.32186	5.997e-09	0.6948	0
16	53805510	chr16:53805510:T:C	C	T	0.289081	6.279e-09	0.6692	0
11	27707958	chr11:27707958:A:G	G	A	-0.320894	6.617e-09	0.7208	0
4	45184122	chr4:45184122:G:A	A	G	0.261749	7.071e-09	0.3661	7.13
11	27622178	chr11:27622178:C:T	T	C	-0.338414	7.655e-09	0.5641	0
4	45173674	chr4:45173674:C:T	T	C	0.257815	8.167e-09	0.3071	16.88
4	45185605	chr4:45185605:C:T	T	C	0.266586	8.167e-09	0.3542	9.16
1	177928840	chr1:177928840:C:T	T	C	0.281563	8.813e-09	0.8224	0
1	177917982	chr1:177917982:C:G	G	C	-0.258382	9.434e-09	0.3596	8.23
11	27681641	chr11:27681641:T:A	A	T	0.31313	9.45e-09	0.8855	0
16	53772233	chr16:53772233:T:C	C	T	0.323893	9.572e-09	0.0392	60.3
11	27684358	chr11:27684358:T:G	G	T	0.312692	1.001e-08	0.8895	0
2	645190	chr2:645190:A:G	G	A	0.517781	1.061e-08	0.0069	75.32
11	27703198	chr11:27703198:C:G	G	C	0.313496	1.078e-08	0.887	0
11	27685939	chr11:27685939:A:C	C	A	0.311594	1.122e-08	0.8851	0
16	30811726	chr16:30811726:G:T	T	G	-0.28223	1.138e-08	0.7035	0
16	30821925	chr16:30821925:C:T	T	C	-0.2817	1.172e-08	0.7247	0
11	27678578	chr11:27678578:C:T	T	C	0.307705	1.185e-08	0.8901	0
1	177935616	chr1:177935616:T:C	C	T	-0.253989	1.197e-08	0.6437	0
2	657578	chr2:657578:G:C	C	G	-0.301646	1.248e-08	0.212	31.42
1	177936039	chr1:177936039:T:C	C	T	-0.253087	1.356e-08	0.6471	0
16	30809545	chr16:30809545:T:C	C	T	-0.279978	1.486e-08	0.7088	0
16	53800596	chr16:53800596:T:C	C	T	0.282091	1.532e-08	0.608	0
16	53783406	chr16:53783406:G:A	A	G	0.434441	1.725e-08	0.7617	0
11	27704439	chr11:27704439:T:A	A	T	0.309468	1.834e-08	0.9182	0
16	28814284	chr16:28814284:G:A	A	G	0.261903	1.915e-08	0.3923	2.49
16	28826585	chr16:28826585:A:G	G	A	0.262749	1.937e-08	0.5789	0
16	28814456	chr16:28814456:C:T	T	C	0.261749	1.959e-08	0.3904	2.84
16	28814632	chr16:28814632:A:G	G	A	0.261672	1.971e-08	0.3901	2.9
16	28814545	chr16:28814545:T:G	G	T	0.261672	1.988e-08	0.3907	2.79
16	28814099	chr16:28814099:C:T	T	C	0.261595	2e-08	0.3917	2.61
1	177935293	chr1:177935293:T:C	C	T	0.258279	2.045e-08	0.9184	0
11	27709009	chr11:27709009:A:G	G	A	-0.316219	2.111e-08	0.8761	0
2	658550	chr2:658550:A:G	G	A	-0.472567	2.126e-08	0.3008	16.76
16	28835925	chr16:28835925:T:C	C	T	0.25503	2.145e-08	0.3381	11.86
11	27588494	chr11:27588494:T:C	C	T	-0.344888	2.297e-08	0.3468	9.26
1	177916627	chr1:177916627:G:A	A	G	0.293416	2.304e-08	0.8657	0
11	27706992	chr11:27706992:A:C	C	A	0.304023	2.353e-08	0.9063	0
16	28813779	chr16:28813779:T:C	C	T	0.260131	2.393e-08	0.3896	2.99
16	30834813	chr16:30834813:G:A	A	G	0.275205	2.464e-08	0.6781	0
5	148461265	chr5:148461265:T:A	A	T	-0.249744	2.512e-08	0.9941	0
5	148461267	chr5:148461267:T:A	A	T	-0.249744	2.529e-08	0.9939	0
2	600575	chr2:600575:G:T	T	G	0.314154	2.561e-08	0.0518	57.45
18	60161902	chr18:60161902:T:C	C	T	0.28953	2.571e-08	0.8393	0
16	28816177	chr16:28816177:T:C	C	T	0.259205	2.696e-08	0.4521	0
11	27662970	chr11:27662970:A:G	G	A	-0.3102	2.733e-08	0.8421	0
11	27680836	chr11:27680836:G:T	T	G	-0.313205	2.88e-08	0.8431	0
16	28821061	chr16:28821061:C:T	T	C	0.258665	2.902e-08	0.4791	0
1	177919294	chr1:177919294:T:C	C	T	0.262364	2.937e-08	0.7902	0
16	28820038	chr16:28820038:T:C	C	T	0.258433	2.989e-08	0.4795	0
11	27681933	chr11:27681933:T:A	A	T	-0.312795	2.992e-08	0.8435	0
11	27687297	chr11:27687297:A:G	G	A	-0.312658	3.044e-08	0.843	0
5	148460549	chr5:148460549:C:T	T	C	-0.248333	3.056e-08	0.9914	0
16	28817513	chr16:28817513:A:C	C	A	0.258202	3.07e-08	0.4574	0
16	53766360	chr16:53766360:T:C	C	T	0.280657	3.094e-08	0.0694	53.96
1	177930963	chr1:177930963:T:C	C	T	0.270485	3.289e-08	0.896	0
16	28821776	chr16:28821776:A:G	G	A	0.257584	3.309e-08	0.4738	0
16	28821978	chr16:28821978:C:A	A	C	0.257584	3.314e-08	0.4817	0
2	601905	chr2:601905:T:G	G	T	0.309762	3.723e-08	0.0473	58.43
16	28824884	chr16:28824884:T:C	C	T	0.256346	3.852e-08	0.4842	0
1	177916353	chr1:177916353:A:G	G	A	0.259977	3.899e-08	0.7068	0
1	177944384	chr1:177944384:T:C	C	T	0.302324	4.429e-08	0.8721	0
1	177916103	chr1:177916103:C:T	T	C	0.257584	4.919e-08	0.7695	0
1	177897657	chr1:177897657:G:A	A	G	-0.244495	5.425e-08	0.5828	0
2	12248323	chr2:12248323:G:A	A	G	-0.475137	6.047e-08	0.5109	0
16	30958165	chr16:30958165:G:T	T	G	-0.262924	6.228e-08	0.3128	15.97
17	48598451	chr17:48598451:C:T	T	C	0.371495	6.333e-08	0.87	0
1	177898473	chr1:177898473:G:A	A	G	-0.243346	6.378e-08	0.59	0
15	36060606	chr15:36060606:C:T	T	C	0.254177	7.128e-08	0.8214	0
16	28857641	chr16:28857641:C:G	G	C	0.252547	7.135e-08	0.5196	0
16	28874610	chr16:28874610:T:C	C	T	0.251925	7.344e-08	0.5315	0
16	28848916	chr16:28848916:C:G	G	C	0.250447	8.671e-08	0.5055	0
16	28806716	chr16:28806716:C:T	T	C	0.25037	8.727e-08	0.3198	14.83
16	28848862	chr16:28848862:G:A	A	G	0.250447	8.731e-08	0.5059	0
16	28860532	chr16:28860532:C:T	T	C	0.250058	9.039e-08	0.5102	0
18	60201132	chr18:60201132:C:T	T	C	0.276571	9.496e-08	0.2235	29.7
18	60244097	chr18:60244097:A:G	G	A	0.279524	9.587e-08	0.1947	34
15	36069143	chr15:36069143:T:C	C	T	0.250837	9.779e-08	0.7889	0
18	60236855	chr18:60236855:C:T	T	C	0.270332	9.802e-08	0.158	39.48
16	28863226	chr16:28863226:C:G	G	C	0.249357	9.912e-08	0.5158	0
18	60237983	chr18:60237983:A:T	T	A	0.279373	9.935e-08	0.1906	34.61
18	60192330	chr18:60192330:C:A	A	C	0.275964	9.957e-08	0.3482	10.17
16	28853352	chr16:28853352:T:C	C	T	0.249279	1.002e-07	0.5181	0
16	28878165	chr16:28878165:C:A	A	C	0.246626	1.003e-07	0.5258	0
16	28850560	chr16:28850560:C:T	T	C	0.249201	1.011e-07	0.5085	0
16	28881816	chr16:28881816:G:A	A	G	0.249045	1.016e-07	0.5179	0
1	177883445	chr1:177883445:T:C	C	T	0.314373	1.017e-07	0.869	0
16	28878810	chr16:28878810:C:A	A	C	0.248889	1.028e-07	0.5103	0
18	60240078	chr18:60240078:G:T	T	G	0.279221	1.032e-07	0.1666	38.19
16	28855740	chr16:28855740:T:C	C	T	0.248889	1.041e-07	0.5062	0
18	60194430	chr18:60194430:T:C	C	T	0.275432	1.042e-07	0.3249	14.01
16	28862077	chr16:28862077:G:A	A	G	0.248889	1.053e-07	0.5253	0
16	28871103	chr16:28871103:T:C	C	T	0.248655	1.056e-07	0.5036	0
16	28861277	chr16:28861277:T:C	C	T	0.248733	1.058e-07	0.5106	0
16	28880144	chr16:28880144:C:T	T	C	0.248577	1.063e-07	0.5169	0
16	28835545	chr16:28835545:G:A	A	G	0.248811	1.069e-07	0.5107	0
18	60236371	chr18:60236371:T:C	C	T	0.277329	1.075e-07	0.1843	35.54
16	28871920	chr16:28871920:A:G	G	A	0.248577	1.076e-07	0.5193	0
16	28853721	chr16:28853721:T:C	C	T	0.245922	1.083e-07	0.5225	0
16	28863883	chr16:28863883:A:T	T	A	0.248499	1.088e-07	0.5153	0
16	28860539	chr16:28860539:A:G	G	A	0.248499	1.094e-07	0.5105	0
16	28856483	chr16:28856483:C:T	T	C	0.248421	1.098e-07	0.5113	0
16	28850413	chr16:28850413:A:C	C	A	0.248421	1.102e-07	0.4985	0
16	28869881	chr16:28869881:A:C	C	A	0.248187	1.117e-07	0.5081	0
16	28854571	chr16:28854571:C:T	T	C	0.248265	1.12e-07	0.5091	0
16	28828104	chr16:28828104:T:C	C	T	0.248343	1.126e-07	0.5106	0
16	28844406	chr16:28844406:A:G	G	A	0.248109	1.131e-07	0.4932	0
16	28831704	chr16:28831704:C:T	T	C	0.248265	1.134e-07	0.5099	0
16	28863801	chr16:28863801:T:G	G	T	0.248109	1.136e-07	0.5126	0
18	60196859	chr18:60196859:C:G	G	C	0.272086	1.14e-07	0.2116	31.47
16	28843448	chr16:28843448:A:G	G	A	0.248031	1.145e-07	0.4913	0
11	27632448	chr11:27632448:C:T	T	C	-0.296925	1.149e-07	0.7468	0
16	28835519	chr16:28835519:T:G	G	T	0.248187	1.149e-07	0.5102	0
16	28848481	chr16:28848481:A:G	G	A	0.248031	1.149e-07	0.5073	0
16	28835828	chr16:28835828:G:C	C	G	0.248187	1.151e-07	0.5095	0
16	28860668	chr16:28860668:A:G	G	A	0.248031	1.151e-07	0.5025	0
16	28852130	chr16:28852130:G:A	A	G	0.247953	1.171e-07	0.507	0
16	28837497	chr16:28837497:A:G	G	A	0.247797	1.174e-07	0.5122	0
16	28859275	chr16:28859275:A:G	G	A	0.247875	1.175e-07	0.5015	0
16	30916669	chr16:30916669:G:A	A	G	-0.259678	1.179e-07	0.1801	36.17
16	28844201	chr16:28844201:G:C	C	G	0.247797	1.182e-07	0.4931	0
16	30968497	chr16:30968497:C:T	T	C	-0.257088	1.191e-07	0.1497	40.74
16	28864161	chr16:28864161:A:G	G	A	0.247641	1.197e-07	0.5387	0
16	28831797	chr16:28831797:A:G	G	A	0.247797	1.201e-07	0.5094	0
16	28882088	chr16:28882088:T:C	C	T	0.247563	1.202e-07	0.5085	0
16	28828609	chr16:28828609:G:T	T	G	0.247719	1.21e-07	0.5039	0
16	28842675	chr16:28842675:A:C	C	A	0.247563	1.215e-07	0.5095	0
16	30982502	chr16:30982502:A:G	G	A	-0.257864	1.222e-07	0.1551	39.92
18	60208994	chr18:60208994:T:C	C	T	0.276874	1.222e-07	0.2047	32.51
18	60222419	chr18:60222419:G:A	A	G	0.277632	1.238e-07	0.3354	12.3
16	30970904	chr16:30970904:A:G	G	A	-0.256571	1.246e-07	0.1504	40.63
18	60191596	chr18:60191596:T:C	C	T	0.273532	1.256e-07	0.3066	16.96
16	28833930	chr16:28833930:G:A	A	G	0.247407	1.257e-07	0.5066	0
16	28833044	chr16:28833044:G:A	A	G	0.247407	1.259e-07	0.4946	0
18	60196236	chr18:60196236:T:G	G	T	0.273609	1.262e-07	0.3229	14.34
2	612364	chr2:612364:C:T	T	C	0.237835	1.267e-07	0.4637	0
18	60210567	chr18:60210567:T:A	A	T	0.276419	1.292e-07	0.2084	31.96
18	60156805	chr18:60156805:C:G	G	C	0.277253	1.303e-07	0.7196	0
18	60246732	chr18:60246732:G:A	A	G	0.276343	1.312e-07	0.296	18.64
16	28882211	chr16:28882211:A:G	G	A	0.246704	1.325e-07	0.5058	0
16	28832963	chr16:28832963:A:G	G	A	0.24686	1.335e-07	0.4938	0
18	60226385	chr18:60226385:C:G	G	C	0.276495	1.351e-07	0.335	12.35
18	60223510	chr18:60223510:C:T	T	C	0.276495	1.365e-07	0.2886	19.8
11	27634566	chr11:27634566:T:C	C	T	-0.278921	1.409e-07	0.6095	0
16	30940245	chr16:30940245:C:G	G	C	-0.251286	1.449e-07	0.2058	32.34
18	60217383	chr18:60217383:T:C	C	T	0.275356	1.462e-07	0.3168	15.33
18	60221513	chr18:60221513:A:G	G	A	0.27528	1.542e-07	0.2941	18.93
18	60189902	chr18:60189902:T:G	G	T	0.271476	1.544e-07	0.2912	19.39
11	27635242	chr11:27635242:G:T	T	G	-0.277996	1.558e-07	0.5401	0
11	27635703	chr11:27635703:A:G	G	A	-0.277732	1.571e-07	0.5447	0
16	30934566	chr16:30934566:G:A	A	G	-0.254247	1.588e-07	0.176	36.78
3	186058702	chr3:186058702:T:C	C	T	0.327936	1.589e-07	0.9974	0
11	27669538	chr11:27669538:T:C	C	T	-0.25515	1.604e-07	0.2354	27.92
15	36061093	chr15:36061093:T:C	C	T	0.245375	1.627e-07	0.8277	0
11	27635363	chr11:27635363:A:G	G	A	-0.276281	1.675e-07	0.549	0
15	36065054	chr15:36065054:C:G	G	C	0.246782	1.706e-07	0.8323	0
18	60208801	chr18:60208801:C:T	T	C	0.273532	1.784e-07	0.1659	38.3
16	53796286	chr16:53796286:G:T	T	G	0.267505	1.917e-07	0.3191	14.96
16	28868163	chr16:28868163:A:G	G	A	0.24373	1.927e-07	0.5062	0
11	27632332	chr11:27632332:G:A	A	G	-0.27549	2.009e-07	0.5171	0
11	27625738	chr11:27625738:C:T	T	C	-0.275885	2.024e-07	0.5661	0
11	27626824	chr11:27626824:A:T	T	A	-0.275358	2.101e-07	0.5513	0
16	30937076	chr16:30937076:A:G	G	A	-0.251157	2.171e-07	0.1753	36.89
1	177912516	chr1:177912516:C:G	G	C	0.297286	2.176e-07	0.7933	0
11	27627033	chr11:27627033:A:T	T	A	-0.275095	2.176e-07	0.5778	0
1	177892222	chr1:177892222:G:C	C	G	0.297137	2.196e-07	0.8055	0
1	177906379	chr1:177906379:A:G	G	A	0.306234	2.201e-07	0.8631	0
11	27612826	chr11:27612826:G:C	C	G	-0.290085	2.301e-07	0.7312	0
18	60205756	chr18:60205756:A:G	G	A	0.271629	2.308e-07	0.1587	39.37
16	28857374	chr16:28857374:G:A	A	G	0.241926	2.434e-07	0.5772	0
1	177903770	chr1:177903770:G:A	A	G	0.303801	2.6e-07	0.8475	0
1	177904075	chr1:177904075:G:T	T	G	0.303654	2.636e-07	0.8477	0
1	177900152	chr1:177900152:T:C	C	T	0.242162	2.638e-07	0.959	0
1	177912289	chr1:177912289:G:A	A	G	0.303728	2.638e-07	0.8712	0
1	177900455	chr1:177900455:A:C	C	A	0.242083	2.677e-07	0.959	0
1	177886382	chr1:177886382:C:A	A	C	0.30225	2.698e-07	0.8626	0
13	62041316	chr13:62041316:T:G	G	T	-0.677077	2.701e-07	0.9314	0
2	613571	chr2:613571:T:C	C	T	0.231112	2.768e-07	0.6462	0
2	617621	chr2:617621:G:A	A	G	0.231746	2.77e-07	0.5176	0
1	177904706	chr1:177904706:G:A	A	G	0.302694	2.869e-07	0.8369	0
1	177899855	chr1:177899855:G:A	A	G	0.293565	2.93e-07	0.7579	0
11	27664649	chr11:27664649:G:T	T	G	-0.249873	3.086e-07	0.2072	32.13
17	48597308	chr17:48597308:T:C	C	T	0.352486	3.123e-07	0.8112	0
16	30907166	chr16:30907166:C:G	G	C	-0.250772	3.248e-07	0.1162	45.95
16	30904912	chr16:30904912:G:A	A	G	-0.251029	3.256e-07	0.1313	43.57
11	27666739	chr11:27666739:A:T	T	A	-0.249231	3.287e-07	0.2439	26.64
1	177909798	chr1:177909798:G:A	A	G	0.292147	3.465e-07	0.8155	0
15	36090270	chr15:36090270:G:A	A	G	0.239883	3.507e-07	0.7903	0
1	177908844	chr1:177908844:T:C	C	T	0.239725	3.533e-07	0.9398	0
15	36104253	chr15:36104253:A:G	G	A	0.241062	3.593e-07	0.6511	0
16	28814986	chr16:28814986:A:G	G	A	0.250759	3.653e-07	0.1215	45.1
1	177910800	chr1:177910800:T:C	C	T	0.299734	3.657e-07	0.869	0
2	12284702	chr2:12284702:A:G	G	A	-0.35882	3.661e-07	0.3372	12
15	36092173	chr15:36092173:G:A	A	G	0.24004	3.873e-07	0.7863	0
16	28883809	chr16:28883809:A:G	G	A	0.235941	3.891e-07	0.2373	27.63
11	27668852	chr11:27668852:C:T	T	C	-0.247436	3.968e-07	0.2522	25.39
15	36092674	chr15:36092674:T:C	C	T	0.239725	3.994e-07	0.791	0
2	603883	chr2:603883:G:T	T	G	0.591114	3.995e-07	0.2972	18.66
15	36098020	chr15:36098020:A:G	G	A	0.237914	4.026e-07	0.7997	0
15	36082190	chr15:36082190:C:T	T	C	0.239489	4.106e-07	0.7893	0
16	28813364	chr16:28813364:T:C	C	T	0.250136	4.244e-07	0.117	45.82
1	177907811	chr1:177907811:C:T	T	C	0.298177	4.248e-07	0.8601	0
15	36074218	chr15:36074218:C:G	G	C	0.238702	4.35e-07	0.784	0
15	36089352	chr15:36089352:T:C	C	T	0.237914	4.377e-07	0.7897	0
15	36086679	chr15:36086679:G:A	A	G	0.238781	4.464e-07	0.777	0
15	36096019	chr15:36096019:T:C	C	T	0.23752	4.508e-07	0.7905	0
15	36079288	chr15:36079288:G:A	A	G	0.239332	4.555e-07	0.769	0
11	27625198	chr11:27625198:G:A	A	G	0.240197	4.714e-07	0.7522	0
14	101838586	chr14:101838586:T:C	C	T	-0.273385	4.726e-07	0.4108	0
15	36086840	chr15:36086840:T:C	C	T	0.238229	4.758e-07	0.7769	0
17	48606475	chr17:48606475:A:G	G	A	0.340037	4.821e-07	0.8258	0
15	36082585	chr15:36082585:C:T	T	C	0.237993	4.905e-07	0.7758	0
5	148464829	chr5:148464829:G:T	T	G	-0.231176	4.975e-07	0.764	0
16	28829060	chr16:28829060:A:G	G	A	0.248421	5.056e-07	0.1025	48.16
5	148459281	chr5:148459281:C:T	T	C	-0.230924	5.082e-07	0.7678	0
11	47804038	chr11:47804038:G:A	A	G	-0.227528	5.103e-07	0.0897	50.33
18	60239267	chr18:60239267:G:A	A	G	0.250914	5.22e-07	0.0458	58.76
11	27623983	chr11:27623983:G:A	A	G	0.239174	5.266e-07	0.754	0
15	36086380	chr15:36086380:G:A	A	G	0.237125	5.355e-07	0.774	0
3	186069545	chr3:186069545:A:G	G	A	-0.311019	5.406e-07	0.9937	0
11	27624699	chr11:27624699:T:C	C	T	0.239332	5.407e-07	0.7055	0
16	28825882	chr16:28825882:T:G	G	T	0.246938	5.436e-07	0.115	46.14
11	27645689	chr11:27645689:G:A	A	G	0.282845	5.462e-07	0.217	32.55
16	28337023	chr16:28337023:G:A	A	G	0.235072	5.797e-07	0.4829	0
18	60187461	chr18:60187461:C:T	T	C	0.264516	5.856e-07	0.328	13.5
10	100866753	chr10:100866753:G:T	T	G	0.260208	5.958e-07	0.5669	0
18	60215484	chr18:60215484:T:C	C	T	0.257506	5.975e-07	0.0526	57.29
18	60230469	chr18:60230469:A:G	G	A	0.258047	6.029e-07	0.0372	60.77
18	60225316	chr18:60225316:T:C	C	T	0.256656	6.12e-07	0.0419	59.66
15	36104395	chr15:36104395:G:A	A	G	0.235467	6.207e-07	0.6566	0
15	36103609	chr15:36103609:G:A	A	G	0.235388	6.211e-07	0.731	0
5	148462790	chr5:148462790:T:C	C	T	-0.229539	6.27e-07	0.8783	0
18	60230570	chr18:60230570:T:C	C	T	0.257429	6.397e-07	0.035	61.34
16	28335819	chr16:28335819:A:C	C	A	0.234281	6.403e-07	0.5115	0
15	36077963	chr15:36077963:A:T	T	A	0.235862	6.498e-07	0.7448	0
4	126593276	chr4:126593276:C:T	T	C	-0.257088	6.554e-07	0.1091	47.09
18	60216568	chr18:60216568:C:T	T	C	0.256501	6.674e-07	0.0826	51.56
18	60218180	chr18:60218180:A:G	G	A	0.256424	6.677e-07	0.0779	52.39
16	28811776	chr16:28811776:A:G	G	A	0.245453	6.816e-07	0.0869	50.8
15	36083436	chr15:36083436:A:G	G	A	0.233886	6.848e-07	0.8602	0
1	177887790	chr1:177887790:C:T	T	C	-0.230546	6.965e-07	0.7562	0
18	60217517	chr18:60217517:G:A	A	G	0.254875	6.977e-07	0.0827	51.54
18	60241442	chr18:60241442:A:G	G	A	0.256037	7.152e-07	0.0372	60.77
15	36106459	chr15:36106459:C:T	T	C	0.234123	7.153e-07	0.7463	0
15	36105238	chr15:36105238:A:G	G	A	0.233965	7.242e-07	0.7227	0
18	60200293	chr18:60200293:A:G	G	A	0.240355	7.256e-07	0.0628	55.22
14	101831421	chr14:101831421:T:C	C	T	-0.268141	7.693e-07	0.3768	5.25
18	60214129	chr18:60214129:C:T	T	C	0.25503	7.748e-07	0.0811	51.81
2	614375	chr2:614375:C:A	A	C	0.222503	7.777e-07	0.694	0
2	617150	chr2:617150:T:C	C	T	0.222263	7.974e-07	0.699	0
18	60191569	chr18:60191569:A:G	G	A	0.239332	7.996e-07	0.0928	49.79
14	101829006	chr14:101829006:A:G	G	A	-0.268926	8.017e-07	0.4093	0
2	617176	chr2:617176:C:G	G	C	0.222183	8.059e-07	0.6973	0
18	60218360	chr18:60218360:C:G	G	C	0.254099	8.474e-07	0.0847	51.2
2	613838	chr2:613838:A:G	G	A	0.221783	8.48e-07	0.6988	0
18	60194728	chr18:60194728:G:A	A	G	0.240119	8.49e-07	0.0855	51.05
2	617190	chr2:617190:C:G	G	C	0.221622	8.564e-07	0.7102	0
4	126597538	chr4:126597538:T:C	C	T	-0.254505	8.64e-07	0.1029	48.11
2	614998	chr2:614998:A:G	G	A	0.221542	8.729e-07	0.7327	0
4	126592498	chr4:126592498:G:A	A	G	-0.253603	8.76e-07	0.1259	44.42
2	613782	chr2:613782:T:C	C	T	0.221462	8.781e-07	0.6986	0
2	614031	chr2:614031:G:A	A	G	0.221382	8.834e-07	0.6983	0
2	614054	chr2:614054:A:G	G	A	0.221382	8.855e-07	0.698	0
14	101837091	chr14:101837091:T:C	C	T	-0.273779	8.892e-07	0.3593	8.28
2	613869	chr2:613869:G:A	A	G	0.221222	8.975e-07	0.697	0
2	614235	chr2:614235:C:T	T	C	0.221222	9.034e-07	0.6982	0
16	31070264	chr16:31070264:A:G	G	A	-0.23775	9.063e-07	0.4193	0
2	613516	chr2:613516:G:A	A	G	0.221142	9.082e-07	0.698	0
2	614081	chr2:614081:T:G	G	T	0.221061	9.166e-07	0.699	0
17	48609478	chr17:48609478:T:C	C	T	0.333683	9.179e-07	0.8151	0
15	36099493	chr15:36099493:A:G	G	A	0.224662	9.253e-07	0.3226	14.39
15	36099645	chr15:36099645:C:A	A	C	0.224023	9.451e-07	0.3393	11.65
2	613883	chr2:613883:G:A	A	G	0.220741	9.481e-07	0.6993	0
2	614111	chr2:614111:G:A	A	G	0.220741	9.594e-07	0.692	0
16	31077304	chr16:31077304:A:G	G	A	-0.237242	9.63e-07	0.3586	8.4
17	48581866	chr17:48581866:T:C	C	T	0.330023	9.751e-07	0.8071	0
18	60222418	chr18:60222418:A:G	G	A	0.253246	9.753e-07	0.0557	56.64
2	615218	chr2:615218:C:T	T	C	0.22042	9.887e-07	0.6954	0
2	616168	chr2:616168:G:T	T	G	0.22042	9.934e-07	0.7002	0
4	126598785	chr4:126598785:C:A	A	C	-0.254505	9.994e-07	0.1032	48.06
2	617394	chr2:617394:A:G	G	A	0.220179	1.005e-06	0.7073	0
2	619056	chr2:619056:G:A	A	G	0.220179	1.005e-06	0.7082	0
2	614578	chr2:614578:A:G	G	A	0.220179	1.009e-06	0.6988	0
2	613154	chr2:613154:C:T	T	C	0.220259	1.01e-06	0.6976	0
16	31093557	chr16:31093557:G:A	A	G	-0.233194	1.016e-06	0.2757	21.8
4	126595634	chr4:126595634:A:T	T	A	-0.254247	1.018e-06	0.0986	48.81
15	36099335	chr15:36099335:G:A	A	G	0.223703	1.024e-06	0.3201	14.79
18	60141746	chr18:60141746:C:A	A	C	0.26559	1.037e-06	0.3108	16.29
11	27628977	chr11:27628977:A:G	G	A	0.234598	1.047e-06	0.8779	0
2	618973	chr2:618973:T:A	A	T	0.219778	1.054e-06	0.7109	0
3	186087505	chr3:186087505:C:G	G	C	-0.307341	1.059e-06	0.9467	0
2	618360	chr2:618360:A:C	C	A	0.219698	1.061e-06	0.7077	0
2	618361	chr2:618361:G:A	A	G	0.219698	1.061e-06	0.7077	0
15	36099764	chr15:36099764:C:T	T	C	0.223543	1.062e-06	0.2985	18.25
15	93257346	chr15:93257346:A:G	G	A	0.227932	1.062e-06	0.7406	0
2	617048	chr2:617048:T:A	A	T	0.219698	1.066e-06	0.7065	0
2	618966	chr2:618966:C:T	T	C	0.219617	1.074e-06	0.7107	0
2	618002	chr2:618002:T:C	C	T	0.219537	1.081e-06	0.7226	0
2	617121	chr2:617121:T:C	C	T	0.219537	1.082e-06	0.7066	0
11	27624700	chr11:27624700:G:A	A	G	0.275129	1.084e-06	0.5957	0
2	618027	chr2:618027:T:C	C	T	0.219457	1.095e-06	0.7071	0
15	36098970	chr15:36098970:T:C	C	T	0.222663	1.095e-06	0.3325	12.77
16	31036758	chr16:31036758:C:T	T	C	-0.234078	1.098e-06	0.2871	20.04
16	28638330	chr16:28638330:C:A	A	C	0.225142	1.1e-06	0.7941	0
2	616686	chr2:616686:T:C	C	T	0.219457	1.105e-06	0.6988	0
4	126596197	chr4:126596197:G:A	A	G	-0.253345	1.109e-06	0.0941	49.57
4	126602209	chr4:126602209:C:T	T	C	-0.253345	1.11e-06	0.1053	47.71
18	60242566	chr18:60242566:T:C	C	T	0.247875	1.126e-06	0.016	67.17
16	28859641	chr16:28859641:G:A	A	G	0.239174	1.127e-06	0.158	39.48
10	7732013	chr10:7732013:A:G	G	A	-0.245773	1.13e-06	0.0909	50.11
11	47826890	chr11:47826890:T:G	G	T	-0.222519	1.141e-06	0.1451	41.44
16	28629858	chr16:28629858:T:C	C	T	0.226338	1.151e-06	0.9498	0
11	47654533	chr11:47654533:G:A	A	G	-0.217783	1.153e-06	0.0673	54.36
16	31096368	chr16:31096368:C:T	T	C	-0.231932	1.158e-06	0.2781	21.43
16	31042146	chr16:31042146:C:T	T	C	-0.233446	1.163e-06	0.2847	20.41
15	36099580	chr15:36099580:G:A	A	G	0.222583	1.164e-06	0.32	14.81
15	36098192	chr15:36098192:A:T	T	A	0.221542	1.171e-06	0.3471	10.34
3	186085743	chr3:186085743:C:T	T	C	-0.305982	1.179e-06	0.9523	0
2	618851	chr2:618851:C:G	G	C	0.218975	1.181e-06	0.6955	0
14	101825258	chr14:101825258:T:G	G	T	-0.262534	1.181e-06	0.3423	11.15
11	47647737	chr11:47647737:C:A	A	C	-0.217286	1.207e-06	0.0621	55.35
16	31058533	chr16:31058533:G:A	A	G	-0.235976	1.207e-06	0.3172	15.27
16	31055217	chr16:31055217:T:G	G	T	-0.224895	1.208e-06	0.1114	46.72
5	148467144	chr5:148467144:A:G	G	A	-0.226273	1.221e-06	0.8051	0
2	616010	chr2:616010:T:C	C	T	0.218573	1.222e-06	0.6937	0
11	47877478	chr11:47877478:C:T	T	C	-0.223019	1.228e-06	0.1754	36.87
2	613290	chr2:613290:T:G	G	T	0.218252	1.255e-06	0.7043	0
3	186084839	chr3:186084839:A:C	C	A	-0.305167	1.266e-06	0.9471	0
1	177895001	chr1:177895001:T:A	A	T	-0.246924	1.274e-06	0.5845	0
1	187365869	chr1:187365869:C:T	T	C	0.681429	1.285e-06	0.6248	0
14	101825991	chr14:101825991:A:G	G	A	-0.261884	1.287e-06	0.3495	9.94
5	148469083	chr5:148469083:T:C	C	T	-0.222644	1.304e-06	0.8157	0
14	101826531	chr14:101826531:T:C	C	T	-0.261495	1.311e-06	0.3449	10.71
15	93257434	chr15:93257434:C:T	T	C	0.22833	1.313e-06	0.7919	0
16	31059160	chr16:31059160:A:T	T	A	-0.232563	1.314e-06	0.2536	25.18
15	36099571	chr15:36099571:C:T	T	C	0.221382	1.32e-06	0.3076	16.81
21	33833724	chr21:33833724:A:G	G	A	0.404732	1.322e-06	0.505	0
16	28861033	chr16:28861033:G:C	C	G	0.239174	1.333e-06	0.127	44.24
11	27654165	chr11:27654165:C:T	T	C	-0.23471	1.337e-06	0.4575	0
16	28860336	chr16:28860336:C:A	A	C	0.239096	1.348e-06	0.1261	44.39
16	28828071	chr16:28828071:G:A	A	G	0.24004	1.352e-06	0.1195	45.41
16	31030978	chr16:31030978:G:A	A	G	-0.23231	1.352e-06	0.2461	26.32
5	148475407	chr5:148475407:C:T	T	C	-0.214308	1.364e-06	0.9876	0
3	186094845	chr3:186094845:G:A	A	G	-0.303811	1.385e-06	0.9459	0
16	31000500	chr16:31000500:T:G	G	T	-0.224144	1.386e-06	0.208	32.02
16	31036959	chr16:31036959:C:T	T	C	-0.234584	1.394e-06	0.3348	12.4
16	28854595	chr16:28854595:G:A	A	G	0.238702	1.4e-06	0.1255	44.47
18	60229509	chr18:60229509:C:T	T	C	0.248967	1.4e-06	0.0513	57.56
11	47845507	chr11:47845507:C:T	T	C	-0.220647	1.411e-06	0.13	43.78
16	28837347	chr16:28837347:T:C	C	T	0.239411	1.411e-06	0.1254	44.49
11	47812794	chr11:47812794:G:A	A	G	-0.221021	1.419e-06	0.1364	42.77
16	28828414	chr16:28828414:C:G	G	C	0.238702	1.422e-06	0.1214	45.12
16	28874338	chr16:28874338:C:T	T	C	0.236652	1.444e-06	0.1387	42.43
4	126595200	chr4:126595200:G:A	A	G	-0.250129	1.455e-06	0.0981	48.89
16	28471740	chr16:28471740:A:T	T	A	0.224662	1.463e-06	0.4564	0
16	30999862	chr16:30999862:A:G	G	A	-0.222019	1.481e-06	0.2016	32.96
18	60159337	chr18:60159337:T:C	C	T	0.26198	1.486e-06	0.1628	38.76
3	186096853	chr3:186096853:G:A	A	G	-0.302999	1.488e-06	0.9461	0
3	186051636	chr3:186051636:C:G	G	C	-0.332261	1.497e-06	0.9192	0
16	28882250	chr16:28882250:T:C	C	T	0.238781	1.501e-06	0.1329	43.31
16	28855838	chr16:28855838:G:A	A	G	0.239253	1.502e-06	0.1103	46.89
16	28853150	chr16:28853150:A:G	G	A	0.239253	1.506e-06	0.1113	46.73
11	47815856	chr11:47815856:G:C	C	G	-0.219774	1.526e-06	0.1366	42.74
11	47843290	chr11:47843290:C:T	T	C	-0.219899	1.529e-06	0.1289	43.94
2	612453	chr2:612453:T:G	G	T	0.216562	1.533e-06	0.7016	0
12	23868155	chr12:23868155:C:T	T	C	0.23815	1.533e-06	0.6911	0
11	47795738	chr11:47795738:A:G	G	A	-0.21965	1.537e-06	0.1202	45.31
16	28830456	chr16:28830456:C:T	T	C	0.237835	1.551e-06	0.1202	45.31
13	62033190	chr13:62033190:A:G	G	A	-0.598383	1.567e-06	0.77	0
11	47693972	chr11:47693972:T:C	C	T	-0.21828	1.572e-06	0.1112	46.74
2	12257447	chr2:12257447:C:G	G	C	-0.409473	1.579e-06	0.682	0
11	47824262	chr11:47824262:A:G	G	A	-0.219276	1.605e-06	0.1328	43.33
11	47827918	chr11:47827918:T:G	G	T	-0.219276	1.614e-06	0.1314	43.56
11	47838641	chr11:47838641:C:T	T	C	-0.219276	1.624e-06	0.1326	43.36
11	47839402	chr11:47839402:A:C	C	A	-0.219152	1.637e-06	0.1315	43.53
11	47809038	chr11:47809038:T:C	C	T	-0.219027	1.663e-06	0.135	42.99
2	12220628	chr2:12220628:G:C	C	G	-0.372514	1.67e-06	0.1285	44.01
16	28333653	chr16:28333653:A:C	C	A	0.224023	1.676e-06	0.4086	0
16	31074149	chr16:31074149:T:C	C	T	-0.219774	1.677e-06	0.1086	47.17
13	62032082	chr13:62032082:T:C	C	T	-0.596384	1.678e-06	0.7689	0
16	28859870	chr16:28859870:C:G	G	C	0.237204	1.679e-06	0.1237	44.76
11	47801504	chr11:47801504:C:T	T	C	-0.218903	1.68e-06	0.1451	41.44
11	47844008	chr11:47844008:C:T	T	C	-0.218903	1.68e-06	0.1319	43.47
16	28872520	chr16:28872520:C:T	T	C	0.237677	1.682e-06	0.1279	44.1
11	47804538	chr11:47804538:A:C	C	A	-0.218778	1.7e-06	0.1381	42.52
5	148475701	chr5:148475701:T:C	C	T	-0.220148	1.709e-06	0.9737	0
15	36110515	chr15:36110515:C:A	A	C	0.218734	1.709e-06	0.2595	24.27
11	47829802	chr11:47829802:C:T	T	C	-0.218778	1.712e-06	0.1328	43.34
15	36106835	chr15:36106835:A:G	G	A	0.218653	1.712e-06	0.2986	18.23
3	186092692	chr3:186092692:C:G	G	C	-0.30124	1.727e-06	0.9513	0
3	186052965	chr3:186052965:T:C	C	T	-0.302187	1.729e-06	0.9692	0
16	28627726	chr16:28627726:A:C	C	A	0.222583	1.735e-06	0.9317	0
11	47779549	chr11:47779549:A:G	G	A	-0.218529	1.736e-06	0.1137	46.35
11	47789065	chr11:47789065:C:T	T	C	-0.218529	1.75e-06	0.1133	46.42
12	103315987	chr12:103315987:T:C	C	T	-0.250643	1.768e-06	0.5429	0
2	12256706	chr2:12256706:A:C	C	A	-0.407668	1.772e-06	0.691	0
3	186068617	chr3:186068617:G:A	A	G	0.306602	1.813e-06	0.9352	0
16	31068050	chr16:31068050:G:T	T	G	-0.228784	1.814e-06	0.3712	6.24
16	31054597	chr16:31054597:T:A	A	T	-0.21965	1.818e-06	0.1005	48.49
16	28884694	chr16:28884694:C:T	T	C	0.229682	1.826e-06	0.7094	0
11	47834562	chr11:47834562:A:G	G	A	-0.218156	1.835e-06	0.1313	43.56
2	618802	chr2:618802:T:C	C	T	0.215031	1.836e-06	0.73	0
11	47784304	chr11:47784304:G:A	A	G	-0.218032	1.839e-06	0.1131	46.44
11	47795458	chr11:47795458:T:G	G	T	-0.218032	1.846e-06	0.1153	46.09
1	187424286	chr1:187424286:A:G	G	A	0.674321	1.847e-06	0.7869	0
11	47860578	chr11:47860578:C:A	A	C	-0.217907	1.852e-06	0.1366	42.75
1	177884085	chr1:177884085:C:G	G	C	-0.216168	1.857e-06	0.935	0
11	47698957	chr11:47698957:T:C	C	T	-0.21654	1.881e-06	0.1063	47.54
11	47856712	chr11:47856712:G:A	A	G	-0.217783	1.883e-06	0.1359	42.86
11	47868869	chr11:47868869:A:T	T	A	-0.217783	1.884e-06	0.134	43.15
2	12283132	chr2:12283132:G:A	A	G	-0.344605	1.905e-06	0.4258	0
11	47860188	chr11:47860188:A:G	G	A	-0.217659	1.907e-06	0.1359	42.86
11	47862708	chr11:47862708:T:C	C	T	-0.217534	1.917e-06	0.1379	42.54
16	31042719	chr16:31042719:G:C	C	G	-0.219027	1.918e-06	0.0999	48.6
16	31051380	chr16:31051380:C:A	A	C	-0.219027	1.955e-06	0.1024	48.18
11	47861230	chr11:47861230:C:T	T	C	-0.21741	1.959e-06	0.1387	42.43
2	12282212	chr2:12282212:G:A	A	G	-0.341224	1.976e-06	0.4656	0
11	47633828	chr11:47633828:C:T	T	C	-0.216044	1.976e-06	0.1504	40.63
2	12216306	chr2:12216306:A:T	T	A	-0.370774	1.986e-06	0.082	51.66
14	101832996	chr14:101832996:A:G	G	A	-0.257994	2.016e-06	0.3075	16.82
11	47586388	chr11:47586388:C:G	G	C	-0.215796	2.024e-06	0.1578	39.51
11	47792728	chr11:47792728:A:G	G	A	-0.217161	2.024e-06	0.1113	46.73
2	12215412	chr2:12215412:C:T	T	C	-0.370484	2.028e-06	0.0736	53.17
11	47754731	chr11:47754731:C:T	T	C	-0.217161	2.029e-06	0.1031	48.07
11	47765986	chr11:47765986:G:A	A	G	-0.217037	2.038e-06	0.1026	48.15
11	47764862	chr11:47764862:A:G	G	A	-0.217037	2.041e-06	0.1055	47.68
11	47854358	chr11:47854358:T:C	C	T	-0.217037	2.041e-06	0.1469	41.17
16	30734655	chr16:30734655:C:T	T	C	-0.370774	2.054e-06	0.0457	62.57
11	47767997	chr11:47767997:G:T	T	G	-0.216913	2.059e-06	0.1027	48.14
11	47765893	chr11:47765893:G:A	A	G	-0.217161	2.071e-06	0.0896	50.33
5	148463704	chr5:148463704:T:G	G	T	-0.210351	2.073e-06	0.9455	0
16	31063854	chr16:31063854:G:A	A	G	-0.229916	2.088e-06	0.3978	1.51
16	31077026	chr16:31077026:G:A	A	G	-0.22665	2.105e-06	0.378	5.04
14	101832708	chr14:101832708:G:T	T	G	-0.257606	2.111e-06	0.3176	15.2
16	28826194	chr16:28826194:T:C	C	T	0.213982	2.111e-06	0.513	0
14	101832845	chr14:101832845:T:C	C	T	-0.257476	2.128e-06	0.2932	19.07
11	47773250	chr11:47773250:C:T	T	C	-0.21654	2.141e-06	0.1017	48.3
11	47760524	chr11:47760524:C:T	T	C	-0.216665	2.148e-06	0.1047	47.8
11	47749924	chr11:47749924:T:C	C	T	-0.216665	2.15e-06	0.1017	48.3
11	47759908	chr11:47759908:G:T	T	G	-0.21654	2.159e-06	0.1021	48.23
11	47842840	chr11:47842840:T:A	A	T	-0.21654	2.167e-06	0.1311	43.6
17	48583715	chr17:48583715:G:C	C	G	0.317799	2.169e-06	0.6904	0
11	47851775	chr11:47851775:G:A	A	G	-0.216416	2.186e-06	0.1386	42.43
12	90829553	chr12:90829553:C:T	T	C	-0.214184	2.2e-06	0.4212	0
11	47862328	chr11:47862328:G:A	A	G	0.207502	2.204e-06	0.0903	50.22
11	47865087	chr11:47865087:T:A	A	T	-0.216292	2.218e-06	0.1333	43.26
11	47794500	chr11:47794500:G:A	A	G	-0.216292	2.22e-06	0.1138	46.33
11	47638449	chr11:47638449:G:T	T	G	-0.215051	2.247e-06	0.1491	40.83
11	47769451	chr11:47769451:C:T	T	C	-0.216044	2.255e-06	0.0991	48.74
11	47748384	chr11:47748384:A:C	C	A	-0.216292	2.256e-06	0.1016	48.32
11	47772986	chr11:47772986:G:C	C	G	-0.216044	2.26e-06	0.1008	48.44
12	75010580	chr12:75010580:G:A	A	G	-0.335333	2.262e-06	0.0097	73.73
10	7725469	chr10:7725469:A:G	G	A	-0.242836	2.277e-06	0.1265	44.31
12	75008407	chr12:75008407:T:C	C	T	-0.335613	2.282e-06	0.0086	74.28
14	101839725	chr14:101839725:C:G	G	C	-0.255409	2.284e-06	0.2923	19.22
17	48584158	chr17:48584158:T:C	C	T	0.316998	2.301e-06	0.6953	0
18	60099280	chr18:60099280:A:G	G	A	0.239253	2.309e-06	0.8059	0
12	90829693	chr12:90829693:T:G	G	T	-0.213688	2.316e-06	0.4193	0
5	148473049	chr5:148473049:T:C	C	T	-0.217037	2.331e-06	0.8364	0
11	47682391	chr11:47682391:T:C	C	T	-0.214679	2.34e-06	0.1078	47.3
11	47735016	chr11:47735016:C:T	T	C	-0.21592	2.357e-06	0.1031	48.06
11	47673956	chr11:47673956:G:A	A	G	-0.214556	2.366e-06	0.1302	43.74
11	47659818	chr11:47659818:T:G	G	T	-0.212575	2.371e-06	0.0512	57.59
11	47605750	chr11:47605750:C:T	T	C	-0.214679	2.377e-06	0.1534	40.19
11	47741957	chr11:47741957:A:G	G	A	-0.215796	2.38e-06	0.1031	48.07
16	28642202	chr16:28642202:C:T	T	C	0.220099	2.383e-06	0.6427	0
2	12214202	chr2:12214202:T:A	A	T	-0.366725	2.39e-06	0.1148	46.17
11	47719110	chr11:47719110:G:A	A	G	-0.215672	2.408e-06	0.104	47.92
16	28499072	chr16:28499072:C:T	T	C	0.210504	2.434e-06	0.4339	0
16	28886131	chr16:28886131:G:A	A	G	0.227215	2.436e-06	0.7037	0
11	47660850	chr11:47660850:C:T	T	C	-0.214184	2.438e-06	0.1348	43.03
11	47685604	chr11:47685604:T:C	C	T	-0.214184	2.444e-06	0.1067	47.47
11	47723822	chr11:47723822:C:T	T	C	-0.215672	2.445e-06	0.1057	47.65
11	47563796	chr11:47563796:G:T	T	G	-0.215175	2.459e-06	0.1037	47.97
11	47645615	chr11:47645615:G:C	C	G	-0.213936	2.46e-06	0.1259	44.41
11	47682648	chr11:47682648:T:G	G	T	-0.21406	2.486e-06	0.1073	47.38
11	47687660	chr11:47687660:C:T	T	C	-0.213936	2.5e-06	0.1079	47.28
11	47787284	chr11:47787284:C:G	G	C	0.206608	2.524e-06	0.0644	54.91
16	28839050	chr16:28839050:T:G	G	T	0.232856	2.535e-06	0.1206	45.25
11	47701267	chr11:47701267:G:A	A	G	-0.21406	2.536e-06	0.1209	45.19
16	31093188	chr16:31093188:C:G	G	C	-0.215796	2.575e-06	0.0667	54.47
11	47770318	chr11:47770318:G:A	A	G	-0.214927	2.582e-06	0.1102	46.91
14	101838055	chr14:101838055:T:C	C	T	-0.262274	2.584e-06	0.3062	17.02
11	47663356	chr11:47663356:T:C	C	T	-0.213565	2.586e-06	0.1291	43.92
14	101836570	chr14:101836570:T:C	C	T	-0.260845	2.586e-06	0.2884	19.82
16	31025699	chr16:31025699:A:T	T	A	-0.225271	2.601e-06	0.1919	34.41
2	12230117	chr2:12230117:A:G	G	A	-0.368169	2.627e-06	0.0899	50.28
14	101837367	chr14:101837367:C:G	G	C	-0.261884	2.668e-06	0.2999	18.03
14	101837335	chr14:101837335:T:C	C	T	-0.261884	2.67e-06	0.2998	18.04
13	58790669	chr13:58790669:G:A	A	G	0.295055	2.677e-06	0.9668	0
11	47684739	chr11:47684739:A:G	G	A	-0.213317	2.683e-06	0.1119	46.64
11	47850460	chr11:47850460:G:T	T	G	-0.214432	2.717e-06	0.1339	43.17
11	47809780	chr11:47809780:A:G	G	A	0.206119	2.72e-06	0.0856	51.03
11	47701271	chr11:47701271:C:G	G	C	-0.213317	2.725e-06	0.1199	45.35
1	177883654	chr1:177883654:C:A	A	C	-0.214803	2.726e-06	0.9507	0
5	147096492	chr5:147096492:C:A	A	C	0.4547	2.732e-06	0.0536	60.83
13	58793633	chr13:58793633:T:C	C	T	0.294831	2.735e-06	0.9669	0
11	47803781	chr11:47803781:A:G	G	A	0.205713	2.736e-06	0.0837	51.37
11	47684534	chr11:47684534:C:T	T	C	-0.213193	2.74e-06	0.1124	46.55
16	53792122	chr16:53792122:T:C	C	T	0.310422	2.762e-06	0.1694	37.77
12	75015636	chr12:75015636:C:T	T	C	-0.331704	2.776e-06	0.0115	72.82
11	47722842	chr11:47722842:C:A	A	C	-0.214432	2.78e-06	0.1162	45.94
11	47708218	chr11:47708218:C:T	T	C	-0.214308	2.801e-06	0.1035	48.01
11	47478715	chr11:47478715:T:C	C	T	-0.212327	2.916e-06	0.1759	36.79
12	75013337	chr12:75013337:C:T	T	C	-0.331704	2.916e-06	0.0089	74.15
2	12224481	chr2:12224481:C:T	T	C	-0.366437	2.941e-06	0.093	49.76
1	177913651	chr1:177913651:C:T	T	C	0.263056	2.965e-06	0.9721	0
7	77002357	chr7:77002357:T:C	C	T	-0.290352	2.974e-06	0.9072	0
15	61938265	chr15:61938265:G:C	C	G	-0.349274	2.984e-06	0.5012	0
11	47783866	chr11:47783866:G:C	C	G	0.20498	2.993e-06	0.0655	54.69
11	47765882	chr11:47765882:T:G	G	T	0.205061	2.994e-06	0.0609	55.59
18	3384567	chr18:3384567:A:G	G	A	-0.286483	2.998e-06	0.4815	0
12	23869226	chr12:23869226:C:A	A	C	0.233252	3.031e-06	0.6877	0
11	47794150	chr11:47794150:G:A	A	G	0.204817	3.034e-06	0.0712	53.62
1	177890507	chr1:177890507:G:C	C	G	-0.211956	3.041e-06	0.8424	0
14	101829746	chr14:101829746:G:C	C	G	-0.252701	3.065e-06	0.3188	15
3	86132067	chr3:86132067:C:T	T	C	0.314007	3.078e-06	0.8493	0
7	77011229	chr7:77011229:T:C	C	T	-0.289818	3.103e-06	0.9007	0
3	86139858	chr3:86139858:T:A	A	T	0.321939	3.106e-06	0.7756	0
11	47550256	chr11:47550256:T:C	C	T	-0.211833	3.107e-06	0.1653	38.38
11	47751966	chr11:47751966:A:G	G	A	0.20498	3.134e-06	0.0613	55.52
16	28906323	chr16:28906323:T:C	C	T	-0.225897	3.137e-06	0.6467	0
2	123526842	chr2:123526842:G:A	A	G	0.378094	3.147e-06	0.722	0
11	47867993	chr11:47867993:C:T	T	C	0.204328	3.147e-06	0.0857	51.02
13	58303159	chr13:58303159:G:T	T	G	-0.291824	3.176e-06	0.8138	0
11	47667791	chr11:47667791:C:T	T	C	-0.211709	3.193e-06	0.1319	43.47
11	47822816	chr11:47822816:G:A	A	G	0.204328	3.204e-06	0.0835	51.41
11	47712892	chr11:47712892:G:A	A	G	-0.213193	3.207e-06	0.1147	46.19
11	47807436	chr11:47807436:C:T	T	C	0.204246	3.248e-06	0.0868	50.82
11	47820310	chr11:47820310:A:G	G	A	0.204165	3.262e-06	0.0834	51.41
11	47758670	chr11:47758670:G:A	A	G	0.204165	3.274e-06	0.062	55.39
2	12218599	chr2:12218599:C:T	T	C	-0.3637	3.28e-06	0.079	52.19
4	36193002	chr4:36193002:A:C	C	A	0.230874	3.322e-06	0.5387	0
2	12192544	chr2:12192544:A:T	T	A	0.359212	3.346e-06	0.2047	32.51
11	27673288	chr11:27673288:A:G	G	A	0.262979	3.356e-06	0.1738	39.67
2	12214197	chr2:12214197:A:G	G	A	-0.36097	3.371e-06	0.0853	51.09
13	58598516	chr13:58598516:T:G	G	T	0.401524	3.395e-06	0.4096	0
11	27669019	chr11:27669019:T:G	G	T	0.262903	3.403e-06	0.1593	42.05
16	28902466	chr16:28902466:T:C	C	T	-0.225521	3.404e-06	0.7295	0
11	47821581	chr11:47821581:A:C	C	A	0.203757	3.413e-06	0.0851	51.11
17	48593060	chr17:48593060:G:C	C	G	0.290129	3.426e-06	0.2	33.21
14	101828877	chr14:101828877:T:C	C	T	-0.251414	3.463e-06	0.2784	21.38
11	47756368	chr11:47756368:G:C	C	G	0.203594	3.481e-06	0.0612	55.54
11	47864812	chr11:47864812:T:C	C	T	0.203349	3.499e-06	0.0849	51.16
11	27660049	chr11:27660049:C:G	G	C	0.262518	3.506e-06	0.1726	39.87
11	47811846	chr11:47811846:A:T	T	A	0.203512	3.509e-06	0.0879	50.64
11	47583087	chr11:47583087:C:T	T	C	0.209531	3.523e-06	0.5077	0
14	101829681	chr14:101829681:G:A	A	G	-0.251029	3.563e-06	0.3084	16.68
5	148476770	chr5:148476770:G:A	A	G	-0.208255	3.565e-06	0.8744	0
16	31027366	chr16:31027366:T:A	A	T	-0.22502	3.585e-06	0.205	32.46
1	177888167	chr1:177888167:T:C	C	T	-0.209734	3.599e-06	0.8212	0
13	58300770	chr13:58300770:G:A	A	G	-0.290085	3.608e-06	0.8091	0
16	53738714	chr16:53738714:T:A	A	T	0.212042	3.611e-06	0.6584	0
16	31014320	chr16:31014320:C:T	T	C	-0.221146	3.626e-06	0.1705	37.6
7	76989304	chr7:76989304:A:G	G	A	-0.287016	3.655e-06	0.875	0
12	103262565	chr12:103262565:C:T	T	C	-0.283823	3.696e-06	0.978	0
18	60135482	chr18:60135482:G:A	A	G	0.243417	3.711e-06	0.8569	0
13	58320529	chr13:58320529:T:C	C	T	-0.290219	3.713e-06	0.7525	0
17	48594792	chr17:48594792:T:C	C	T	0.289306	3.721e-06	0.1839	35.6
11	47750656	chr11:47750656:T:G	G	T	0.203022	3.75e-06	0.0616	55.45
7	77007786	chr7:77007786:A:G	G	A	-0.283557	3.758e-06	0.8262	0
11	47532785	chr11:47532785:G:A	A	G	-0.209981	3.775e-06	0.1812	36.01
16	28846324	chr16:28846324:A:G	G	A	0.21099	3.796e-06	0.351	9.7
11	47819070	chr11:47819070:T:C	C	T	0.202778	3.798e-06	0.0873	50.73
5	23298006	chr5:23298006:T:C	C	T	-0.661842	3.819e-06	0.9959	0
5	23286074	chr5:23286074:T:C	C	T	-0.661649	3.851e-06	0.9966	0
21	33802790	chr21:33802790:C:A	A	C	0.346281	3.858e-06	0.9672	0
11	47445238	chr11:47445238:A:T	T	A	0.21632	3.902e-06	0.0516	57.5
16	28894763	chr16:28894763:G:C	C	G	-0.223644	3.907e-06	0.704	0
11	47537306	chr11:47537306:G:A	A	G	-0.209734	3.914e-06	0.1849	35.45
12	103329803	chr12:103329803:C:T	T	C	-0.281965	4.017e-06	0.8822	0
11	47482523	chr11:47482523:G:T	T	G	-0.209364	4.068e-06	0.1838	35.62
2	12214903	chr2:12214903:T:A	A	T	-0.357247	4.069e-06	0.141	42.07
14	101828809	chr14:101828809:C:G	G	C	-0.259419	4.078e-06	0.3225	14.4
17	48577585	chr17:48577585:T:C	C	T	0.308146	4.098e-06	0.879	0
2	12214896	chr2:12214896:G:A	A	G	-0.357104	4.115e-06	0.1424	41.86
11	47544800	chr11:47544800:T:C	C	T	0.206933	4.13e-06	0.5847	0
21	33794499	chr21:33794499:G:T	T	G	0.340037	4.142e-06	0.9954	0
16	30892358	chr16:30892358:C:T	T	C	-0.222519	4.156e-06	0.7645	0
11	27673917	chr11:27673917:A:G	G	A	-0.229162	4.186e-06	0.6348	0
18	60071840	chr18:60071840:C:T	T	C	0.22833	4.2e-06	0.4491	0
1	213382348	chr1:213382348:T:C	C	T	0.211799	4.218e-06	0.41	0
13	58801391	chr13:58801391:T:G	G	T	0.307852	4.22e-06	0.7798	0
15	36099692	chr15:36099692:T:C	C	T	0.208477	4.226e-06	0.249	25.88
11	47769877	chr11:47769877:C:T	T	C	0.202124	4.267e-06	0.0756	52.81
15	93257399	chr15:93257399:C:T	T	C	0.216723	4.268e-06	0.7721	0
11	27672444	chr11:27672444:C:G	G	C	-0.229287	4.272e-06	0.6418	0
11	47797152	chr11:47797152:G:A	A	G	0.201797	4.316e-06	0.0762	52.7
3	186044057	chr3:186044057:G:T	T	G	0.291026	4.338e-06	0.9882	0
4	36194778	chr4:36194778:T:C	C	T	0.228091	4.358e-06	0.5401	0
14	101821231	chr14:101821231:T:G	G	T	-0.261754	4.358e-06	0.1704	37.62
1	177883908	chr1:177883908:G:T	T	G	-0.210104	4.385e-06	0.9344	0
16	31002858	chr16:31002858:C:T	T	C	-0.209487	4.394e-06	0.0883	50.55
12	90834315	chr12:90834315:G:A	A	G	-0.209364	4.405e-06	0.42	0
11	47797155	chr11:47797155:A:T	T	A	0.201552	4.418e-06	0.0748	52.95
16	28506388	chr16:28506388:T:C	C	T	0.202941	4.418e-06	0.4135	0
16	53721234	chr16:53721234:A:G	G	A	0.210504	4.418e-06	0.7048	0
16	28507775	chr16:28507775:T:C	C	T	0.204654	4.471e-06	0.3961	1.81
12	75020793	chr12:75020793:G:T	T	G	-0.325038	4.472e-06	0.0067	75.43
5	148476829	chr5:148476829:A:G	G	A	-0.208624	4.514e-06	0.883	0
16	30886135	chr16:30886135:T:C	C	T	-0.22127	4.529e-06	0.7562	0
11	47459981	chr11:47459981:T:C	C	T	-0.208255	4.552e-06	0.1435	41.69
11	47737123	chr11:47737123:G:A	A	G	0.201307	4.553e-06	0.0626	55.27
11	47797153	chr11:47797153:G:T	T	G	0.201307	4.565e-06	0.0764	52.67
11	47600860	chr11:47600860:G:A	A	G	0.207014	4.601e-06	0.4946	0
11	27701787	chr11:27701787:G:A	A	G	0.259205	4.629e-06	0.1726	39.87
16	53738434	chr16:53738434:A:G	G	A	0.209531	4.662e-06	0.642	0
11	47759505	chr11:47759505:C:T	T	C	0.200898	4.681e-06	0.0642	54.94
11	47738289	chr11:47738289:G:A	A	G	0.20098	4.687e-06	0.0643	54.92
21	33491682	chr21:33491682:C:G	G	C	0.317508	4.704e-06	0.5141	0
17	48610894	chr17:48610894:T:C	C	T	0.313423	4.772e-06	0.8713	0
11	47589600	chr11:47589600:C:T	T	C	0.206526	4.849e-06	0.5618	0
21	33810583	chr21:33810583:T:A	A	T	0.333683	4.86e-06	0.9656	0
18	60065186	chr18:60065186:T:C	C	T	-0.231806	4.871e-06	0.824	0
11	47731818	chr11:47731818:C:T	T	C	0.200653	4.881e-06	0.064	54.98
16	28336386	chr16:28336386:T:C	C	T	0.209531	4.935e-06	0.7572	0
3	186102494	chr3:186102494:A:G	G	A	0.294012	5.031e-06	0.9211	0
16	31092475	chr16:31092475:A:G	G	A	0.211071	5.083e-06	0.1136	46.36
6	6472984	chr6:6472984:A:G	G	A	0.215918	5.092e-06	0.1912	36.81
4	45184815	chr4:45184815:T:C	C	T	-0.203709	5.104e-06	0.5413	0
1	213383470	chr1:213383470:G:C	C	G	0.21382	5.112e-06	0.2344	28.07
18	60247446	chr18:60247446:G:A	A	G	0.245922	5.139e-06	0.3049	17.23
16	53736837	chr16:53736837:C:A	A	C	0.208639	5.245e-06	0.6579	0
16	28499524	chr16:28499524:A:G	G	A	0.203431	5.259e-06	0.4352	0
10	7727641	chr10:7727641:A:G	G	A	-0.233699	5.263e-06	0.1295	43.85
16	28513291	chr16:28513291:C:G	G	C	0.202778	5.338e-06	0.3977	1.52
12	90828892	chr12:90828892:C:T	T	C	-0.207516	5.352e-06	0.4345	0
11	27700731	chr11:27700731:G:T	T	G	0.257506	5.37e-06	0.1802	38.63
16	28817907	chr16:28817907:A:G	G	A	0.215676	5.418e-06	0.3622	7.78
14	75562176	chr14:75562176:C:T	T	C	0.281639	5.48e-06	0.0377	60.67
10	7725233	chr10:7725233:T:G	G	T	-0.232941	5.531e-06	0.1294	43.86
16	53722121	chr16:53722121:C:T	T	C	0.208477	5.589e-06	0.6574	0
5	148466840	chr5:148466840:T:C	C	T	-0.206901	5.598e-06	0.333	12.69
16	30818683	chr16:30818683:G:A	A	G	0.212123	5.64e-06	0.8005	0
4	2020654	chr4:2020654:G:C	C	G	0.40226	5.648e-06	0.3385	10.88
13	58779847	chr13:58779847:C:T	T	C	0.288482	5.68e-06	0.9483	0
11	8382954	chr11:8382954:A:G	G	A	-0.205549	5.688e-06	0.2457	26.38
21	33491977	chr21:33491977:T:C	C	T	0.314665	5.697e-06	0.5707	0
13	58778853	chr13:58778853:T:C	C	T	0.288407	5.702e-06	0.9483	0
11	27685862	chr11:27685862:G:A	A	G	0.256888	5.73e-06	0.1828	38.19
11	47713602	chr11:47713602:T:A	A	T	0.199179	5.753e-06	0.0658	54.63
12	90829370	chr12:90829370:C:T	T	C	-0.206778	5.794e-06	0.4329	0
16	31106092	chr16:31106092:C:T	T	C	-0.220647	5.798e-06	0.5655	0
7	77002936	chr7:77002936:A:G	G	A	-0.270891	5.813e-06	0.5775	0
10	7722754	chr10:7722754:G:C	C	G	-0.23231	5.82e-06	0.1283	44.04
6	98046342	chr6:98046342:C:T	T	C	-0.201994	5.849e-06	0.3995	1.19
16	53722221	chr16:53722221:T:C	C	T	0.208152	5.865e-06	0.686	0
11	47653764	chr11:47653764:T:C	C	T	-0.202728	5.916e-06	0.0577	56.24
3	17920870	chr3:17920870:C:T	T	C	1.32941	5.925e-06	0.3274	0
21	33833349	chr21:33833349:T:C	C	T	0.333181	5.937e-06	0.5975	0
13	58304151	chr13:58304151:A:T	T	A	-0.339537	5.945e-06	0.6096	0
3	186104564	chr3:186104564:T:G	G	T	-0.317042	5.948e-06	0.7491	0
11	27530835	chr11:27530835:C:T	T	C	-0.248461	5.994e-06	0.7122	0
3	86146443	chr3:86146443:G:T	T	G	0.313057	6.004e-06	0.5265	0
1	213378026	chr1:213378026:A:G	G	A	0.208963	6.034e-06	0.3221	14.46
16	30875322	chr16:30875322:T:C	C	T	-0.218903	6.036e-06	0.8012	0
11	47508395	chr11:47508395:C:A	A	C	0.203757	6.069e-06	0.5593	0
11	27679818	chr11:27679818:G:A	A	G	0.256888	6.077e-06	0.1658	40.98
3	86133158	chr3:86133158:T:C	C	T	0.274141	6.096e-06	0.529	0
16	53722225	chr16:53722225:C:T	T	C	0.207664	6.102e-06	0.653	0
12	90833372	chr12:90833372:G:A	A	G	-0.206164	6.104e-06	0.4222	0
16	30878824	chr16:30878824:C:G	G	C	-0.218654	6.123e-06	0.7605	0
21	33790607	chr21:33790607:C:T	T	C	0.318817	6.124e-06	0.9833	0
16	30869978	chr16:30869978:G:A	A	G	-0.218654	6.172e-06	0.7851	0
13	58780199	chr13:58780199:C:T	T	C	0.287357	6.177e-06	0.9493	0
13	58764020	chr13:58764020:A:G	G	A	0.287357	6.227e-06	0.9141	0
5	23288770	chr5:23288770:T:C	C	T	-0.646645	6.236e-06	0.9939	0
1	177891196	chr1:177891196:G:A	A	G	-0.20469	6.245e-06	0.8152	0
1	177901122	chr1:177901122:T:A	A	T	-0.20469	6.26e-06	0.7479	0
7	77002781	chr7:77002781:G:A	A	G	-0.270104	6.27e-06	0.6108	0
1	213376617	chr1:213376617:T:C	C	T	0.208477	6.31e-06	0.5072	0
12	103275175	chr12:103275175:T:C	C	T	-0.27694	6.369e-06	0.9856	0
13	58332283	chr13:58332283:T:A	A	T	-0.337713	6.409e-06	0.5321	0
18	60072608	chr18:60072608:G:T	T	G	0.224662	6.425e-06	0.4014	0.85
12	90836724	chr12:90836724:C:A	A	C	-0.202973	6.437e-06	0.4417	0
12	103319759	chr12:103319759:C:T	T	C	-0.269449	6.442e-06	0.9896	0
3	86133153	chr3:86133153:C:T	T	C	0.27338	6.455e-06	0.5356	0
4	45199413	chr4:45199413:C:A	A	C	0.207664	6.467e-06	0.1453	41.42
16	31001492	chr16:31001492:G:T	T	G	0.214708	6.486e-06	0.239	27.38
16	30879217	chr16:30879217:C:T	T	C	-0.217907	6.547e-06	0.7611	0
11	47647697	chr11:47647697:A:C	C	A	-0.201627	6.581e-06	0.0543	56.93
15	61912944	chr15:61912944:C:T	T	C	0.329591	6.628e-06	0.3085	16.66
6	6472186	chr6:6472186:T:C	C	T	0.212608	6.713e-06	0.2106	33.61
21	33792857	chr21:33792857:A:C	C	A	0.311887	6.762e-06	0.9428	0
16	28509255	chr16:28509255:A:G	G	A	0.200653	6.793e-06	0.3868	3.49
7	76967883	chr7:76967883:G:A	A	G	-0.279449	6.804e-06	0.8905	0
19	47060161	chr19:47060161:T:C	C	T	0.203757	6.823e-06	0.6884	0
1	12846482	chr1:12846482:A:G	G	A	0.329376	6.834e-06	0.4649	0
1	177885264	chr1:177885264:A:G	G	A	-0.204199	6.903e-06	0.7914	0
2	123584690	chr2:123584690:G:A	A	G	0.205468	6.916e-06	0.2277	29.08
3	86135479	chr3:86135479:A:G	G	A	0.3143	7.01e-06	0.6162	0
13	58329818	chr13:58329818:C:T	T	C	-0.2817	7.023e-06	0.7467	0
12	90832164	chr12:90832164:T:C	C	T	-0.20469	7.043e-06	0.4296	0
11	47823031	chr11:47823031:T:C	C	T	-0.205181	7.054e-06	0.1133	46.41
14	25478230	chr14:25478230:C:T	T	C	0.205631	7.086e-06	0.7373	0
16	30994246	chr16:30994246:T:C	C	T	0.223224	7.12e-06	0.2944	18.89
4	45283052	chr4:45283052:G:C	C	G	0.21793	7.124e-06	0.4094	0
16	53631022	chr16:53631022:C:T	T	C	0.364921	7.205e-06	0.5191	0
11	47843608	chr11:47843608:G:T	T	G	-0.204935	7.262e-06	0.1101	46.93
11	47835701	chr11:47835701:T:C	C	T	-0.204813	7.376e-06	0.1107	46.83
4	45178180	chr4:45178180:A:C	C	A	-0.200282	7.424e-06	0.614	0
3	86143977	chr3:86143977:C:A	A	C	0.31313	7.425e-06	0.5716	0
3	86133489	chr3:86133489:T:A	A	T	0.312838	7.436e-06	0.6201	0
14	101830878	chr14:101830878:C:G	G	C	-0.247692	7.442e-06	0.2394	27.33
16	28499216	chr16:28499216:A:G	G	A	0.200325	7.476e-06	0.3676	6.86
21	33804593	chr21:33804593:G:T	T	G	0.31998	7.486e-06	0.9563	0
3	186106215	chr3:186106215:T:C	C	T	0.284502	7.496e-06	0.9583	0
11	47834830	chr11:47834830:C:G	G	C	-0.204567	7.521e-06	0.1126	46.53
14	25480071	chr14:25480071:G:T	T	G	0.207583	7.53e-06	0.8696	0
6	6472396	chr6:6472396:A:G	G	A	0.211152	7.535e-06	0.224	31.38
16	28362840	chr16:28362840:G:C	C	G	0.211961	7.616e-06	0.6682	0
11	47651191	chr11:47651191:C:T	T	C	-0.199793	7.626e-06	0.055	56.78
5	148466252	chr5:148466252:A:C	C	A	-0.20126	7.639e-06	0.3541	9.17
16	28620209	chr16:28620209:A:T	T	A	0.21801	7.662e-06	0.4687	0
11	47830505	chr11:47830505:T:C	C	T	-0.204322	7.673e-06	0.1126	46.53
3	85909129	chr3:85909129:G:C	C	G	0.32772	7.685e-06	0.5218	0
21	33443918	chr21:33443918:T:G	G	T	0.338898	7.724e-06	0.2175	30.6
17	81123969	chr17:81123969:T:G	G	T	0.263056	7.753e-06	0.9793	0
11	47629441	chr11:47629441:C:T	T	C	0.201389	7.798e-06	0.4029	0.58
6	50778086	chr6:50778086:T:G	G	T	-0.373966	7.819e-06	0.0767	56.24
1	187454500	chr1:187454500:T:G	G	T	0.844666	7.828e-06	0.8494	0
6	50776887	chr6:50776887:G:A	A	G	-0.373966	7.836e-06	0.0767	56.23
2	12213365	chr2:12213365:C:G	G	C	-0.345735	7.85e-06	0.1583	39.43
6	82000475	chr6:82000475:A:T	T	A	0.199834	7.958e-06	0.1033	48.03
21	33475087	chr21:33475087:C:A	A	C	0.346352	7.958e-06	0.2733	22.16
21	33439661	chr21:33439661:T:G	G	T	0.338399	7.967e-06	0.2155	30.9
6	6470659	chr6:6470659:T:C	C	T	0.210585	7.975e-06	0.2287	30.6
6	50776475	chr6:50776475:C:G	G	C	-0.373676	7.979e-06	0.0767	56.23
13	58779572	chr13:58779572:G:C	C	G	0.272924	7.98e-06	0.9072	0
13	58765639	chr13:58765639:C:T	T	C	0.285029	8e-06	0.9282	0
12	75024497	chr12:75024497:A:G	G	A	-0.335752	8.05e-06	0.0049	76.74
17	7087557	chr17:7087557:A:T	T	A	0.247251	8.116e-06	0.7431	0
11	47865535	chr11:47865535:T:C	C	T	-0.203586	8.183e-06	0.1148	46.17
16	30905109	chr16:30905109:C:G	G	C	-0.211462	8.204e-06	0.7495	0
11	47776365	chr11:47776365:A:T	T	A	-0.203586	8.244e-06	0.0929	49.78
12	103293768	chr12:103293768:G:A	A	G	-0.272596	8.27e-06	0.9968	0
11	47763795	chr11:47763795:T:C	C	T	-0.203586	8.275e-06	0.0862	50.92
2	12213307	chr2:12213307:G:A	A	G	-0.345594	8.299e-06	0.1391	42.36
1	177904198	chr1:177904198:A:G	G	A	-0.201994	8.301e-06	0.761	0
16	28570821	chr16:28570821:G:T	T	G	-0.209611	8.331e-06	0.9615	0
11	47777201	chr11:47777201:A:G	G	A	-0.203463	8.359e-06	0.0933	49.71
3	86136478	chr3:86136478:T:C	C	T	0.311228	8.36e-06	0.6287	0
12	121714349	chr12:121714349:C:T	T	C	-0.496101	8.375e-06	0.8024	0
4	36152010	chr4:36152010:T:C	C	T	0.219216	8.394e-06	0.4506	0
21	33445431	chr21:33445431:T:C	C	T	0.337329	8.446e-06	0.2113	31.53
3	86128984	chr3:86128984:A:T	T	A	0.311228	8.456e-06	0.578	0
7	77000827	chr7:77000827:A:G	G	A	-0.266312	8.46e-06	0.5611	0
21	33445435	chr21:33445435:A:G	G	A	0.337258	8.484e-06	0.2112	31.55
21	33444660	chr21:33444660:T:A	A	T	0.337329	8.52e-06	0.2106	31.63
3	86131460	chr3:86131460:G:A	A	G	0.311594	8.529e-06	0.6089	0
21	33436342	chr21:33436342:T:G	G	T	0.337614	8.529e-06	0.2218	29.95
14	101822326	chr14:101822326:A:G	G	A	-0.256959	8.543e-06	0.3669	6.98
19	47045898	chr19:47045898:T:C	C	T	0.199506	8.585e-06	0.5915	0
7	76970173	chr7:76970173:G:C	C	G	-0.279317	8.594e-06	0.8334	0
3	186116501	chr3:186116501:T:C	C	T	0.228807	8.605e-06	0.7951	0
21	33504401	chr21:33504401:G:C	C	G	0.337329	8.648e-06	0.5357	0
16	30811088	chr16:30811088:G:A	A	G	0.207989	8.72e-06	0.7694	0
18	60185715	chr18:60185715:A:C	C	A	0.226179	8.74e-06	0.1245	44.62
16	28330310	chr16:28330310:C:A	A	C	0.204002	8.841e-06	0.6207	0
16	28513402	chr16:28513402:C:T	T	C	0.198113	8.92e-06	0.3789	4.89
4	36155288	chr4:36155288:T:C	C	T	0.21632	8.956e-06	0.4818	0
3	86129342	chr3:86129342:G:A	A	G	0.310715	8.966e-06	0.5831	0
21	33793719	chr21:33793719:T:A	A	T	0.323676	9.006e-06	0.9903	0
11	47768224	chr11:47768224:C:T	T	C	-0.201994	9.103e-06	0.0864	50.9
11	47763733	chr11:47763733:G:C	C	G	-0.202483	9.176e-06	0.0847	51.19
5	77146826	chr5:77146826:G:A	A	G	0.214224	9.296e-06	0.1017	48.3
6	82000568	chr6:82000568:G:A	A	G	0.198277	9.336e-06	0.1011	48.4
1	177902751	chr1:177902751:T:C	C	T	0.214385	9.36e-06	0.9291	0
4	36158981	chr4:36158981:G:A	A	G	0.218091	9.362e-06	0.5657	0
6	50754154	chr6:50754154:C:A	A	C	-0.372514	9.471e-06	0.0738	56.77
1	177900806	chr1:177900806:A:G	G	A	0.214224	9.488e-06	0.929	0
11	47652549	chr11:47652549:G:A	A	G	0.197703	9.525e-06	0.0599	55.8
7	77001191	chr7:77001191:G:C	C	G	-0.265138	9.531e-06	0.5364	0
16	30818443	chr16:30818443:C:T	T	C	0.206364	9.532e-06	0.8157	0
16	16824870	chr16:16824870:C:T	T	C	-0.275358	9.56e-06	0.5683	0
5	23293033	chr5:23293033:T:C	C	T	-0.624181	9.586e-06	0.9305	0
4	45200657	chr4:45200657:T:C	C	T	0.203267	9.682e-06	0.1532	40.22
16	28525441	chr16:28525441:T:C	C	T	0.203594	9.706e-06	0.9199	0
2	123597490	chr2:123597490:C:T	T	C	0.373699	9.722e-06	0.1883	34.95
7	13437258	chr7:13437258:A:G	G	A	-0.193585	9.742e-06	0.9544	0
4	45222483	chr4:45222483:G:A	A	G	0.211961	9.76e-06	0.43	0
11	47849465	chr11:47849465:T:C	C	T	-0.201871	9.836e-06	0.1184	45.59
11	27647247	chr11:27647247:A:C	C	A	-0.219027	9.867e-06	0.6194	0
11	27650705	chr11:27650705:C:G	G	C	-0.218903	9.97e-06	0.673	0
4	126629583	chr4:126629583:A:G	G	A	-0.229036	1.001e-05	0.1207	45.23
16	31029816	chr16:31029816:G:A	A	G	0.208801	1.001e-05	0.5456	0
11	27645655	chr11:27645655:T:G	G	T	-0.217907	1.019e-05	0.6415	0
11	47789757	chr11:47789757:A:C	C	A	-0.223394	1.019e-05	0.569	0
11	47736980	chr11:47736980:A:C	C	A	-0.201627	1.025e-05	0.0867	50.84
3	86132068	chr3:86132068:C:T	T	C	0.308734	1.027e-05	0.6157	0
11	47736979	chr11:47736979:A:G	G	A	-0.201627	1.027e-05	0.0867	50.84
8	15252432	chr8:15252432:C:G	G	C	0.223064	1.03e-05	0.8739	0
1	106620820	chr1:106620820:C:T	T	C	0.216562	1.032e-05	0.2923	19.21
11	47417893	chr11:47417893:A:G	G	A	0.207095	1.037e-05	0.1897	34.75
16	28522717	chr16:28522717:C:T	T	C	0.202941	1.037e-05	0.9222	0
16	28528527	chr16:28528527:C:T	T	C	0.201143	1.042e-05	0.9384	0
4	36154893	chr4:36154893:T:C	C	T	0.21624	1.046e-05	0.503	0
11	47856248	chr11:47856248:A:G	G	A	-0.20126	1.046e-05	0.1264	44.34
14	101819963	chr14:101819963:G:A	A	G	-0.25515	1.047e-05	0.1325	43.38
11	47653382	chr11:47653382:G:A	A	G	-0.199915	1.057e-05	0.1165	45.89
17	48573699	chr17:48573699:T:C	C	T	0.294236	1.06e-05	0.9074	0
16	28530073	chr16:28530073:T:C	C	T	0.202696	1.061e-05	0.9256	0
16	28521750	chr16:28521750:C:T	T	C	0.202778	1.066e-05	0.9291	0
16	28527972	chr16:28527972:A:G	G	A	0.202696	1.066e-05	0.9258	0
15	38220360	chr15:38220360:T:C	C	T	0.482673	1.077e-05	0.3265	13.19
16	28492860	chr16:28492860:G:A	A	G	0.199916	1.084e-05	0.6661	0
16	28910828	chr16:28910828:C:T	T	C	-0.214432	1.087e-05	0.6126	0
11	47790381	chr11:47790381:A:G	G	A	-0.199671	1.088e-05	0.1004	48.51
17	13529931	chr17:13529931:G:A	A	G	0.198933	1.097e-05	0.3329	12.71
17	66679781	chr17:66679781:A:G	G	A	0.218332	1.097e-05	0.9069	0
11	47680267	chr11:47680267:T:C	C	T	-0.199793	1.098e-05	0.1056	47.66
21	33455533	chr21:33455533:C:A	A	C	0.334685	1.098e-05	0.1933	34.2
1	177899747	chr1:177899747:G:T	T	G	0.211961	1.099e-05	0.9295	0
11	27451158	chr11:27451158:A:G	G	A	-0.32186	1.099e-05	0.1944	36.29
16	28520032	chr16:28520032:C:T	T	C	0.201389	1.1e-05	0.8437	0
21	33819845	chr21:33819845:G:A	A	G	0.348048	1.1e-05	0.7216	0
16	28515576	chr16:28515576:T:C	C	T	0.201225	1.102e-05	0.8131	0
11	27624610	chr11:27624610:A:T	T	A	0.208152	1.104e-05	0.0156	67.34
11	47698676	chr11:47698676:A:G	G	A	-0.199793	1.106e-05	0.0993	48.71
2	12209465	chr2:12209465:C:T	T	C	-0.34249	1.108e-05	0.0403	60.03
16	28525152	chr16:28525152:C:T	T	C	0.202288	1.109e-05	0.9296	0
10	7709663	chr10:7709663:G:A	A	G	-0.222019	1.11e-05	0.1262	44.36
11	47437214	chr11:47437214:T:C	C	T	0.20677	1.118e-05	0.1554	39.87
15	93257426	chr15:93257426:C:G	G	C	0.244357	1.12e-05	0.7561	0
7	76981090	chr7:76981090:A:G	G	A	-0.274174	1.122e-05	0.9301	0
10	7717310	chr10:7717310:A:T	T	A	-0.224645	1.123e-05	0.1666	38.19
18	60172536	chr18:60172536:C:A	A	C	0.22058	1.128e-05	0.0351	61.31
12	103282847	chr12:103282847:T:C	C	T	-0.262274	1.136e-05	0.9866	0
16	28475735	chr16:28475735:A:G	G	A	0.211233	1.139e-05	0.6107	0
11	47662213	chr11:47662213:A:G	G	A	-0.199305	1.142e-05	0.1053	47.71
11	47757493	chr11:47757493:T:C	C	T	-0.200526	1.142e-05	0.0979	48.93
3	33787770	chr3:33787770:T:C	C	T	0.342454	1.143e-05	0.1349	46.07
3	17947364	chr3:17947364:G:A	A	G	1.30008	1.148e-05	0.3038	5.45
6	82002124	chr6:82002124:G:A	A	G	0.196224	1.151e-05	0.1185	45.59
3	49862917	chr3:49862917:G:A	A	G	-0.291422	1.153e-05	0.7614	0
11	47372787	chr11:47372787:T:C	C	T	-0.205549	1.159e-05	0.1164	45.91
18	60171168	chr18:60171168:G:A	A	G	0.222743	1.162e-05	0.031	62.39
3	85908976	chr3:85908976:G:A	A	G	0.323532	1.163e-05	0.3994	0
11	47661119	chr11:47661119:T:C	C	T	-0.199061	1.163e-05	0.1049	47.77
16	28520867	chr16:28520867:T:G	G	T	0.201143	1.164e-05	0.8962	0
10	49227887	chr10:49227887:G:A	A	G	0.569962	1.173e-05	0.8438	0
8	15251698	chr8:15251698:A:C	C	A	0.221302	1.179e-05	0.8365	0
4	126629800	chr4:126629800:A:G	G	A	-0.227026	1.187e-05	0.1158	46.01
6	82002054	chr6:82002054:T:G	G	T	0.195978	1.187e-05	0.1176	45.72
2	123575353	chr2:123575353:A:C	C	A	0.329376	1.188e-05	0.5079	0
11	47373689	chr11:47373689:G:A	A	G	-0.205304	1.188e-05	0.121	45.18
10	49229137	chr10:49229137:A:T	T	A	0.569623	1.189e-05	0.8426	0
12	90849565	chr12:90849565:C:G	G	C	-0.201994	1.192e-05	0.2424	26.87
16	28620700	chr16:28620700:T:G	G	T	-0.205181	1.193e-05	0.7378	0
3	49904003	chr3:49904003:G:A	A	G	0.194415	1.196e-05	0.9518	0
3	186101093	chr3:186101093:A:G	G	A	-0.281965	1.2e-05	0.9209	0
6	97952610	chr6:97952610:T:C	C	T	0.193591	1.202e-05	0.5564	0
16	28518395	chr16:28518395:C:T	T	C	0.200489	1.202e-05	0.8448	0
11	47674662	chr11:47674662:A:T	T	A	-0.198817	1.205e-05	0.1078	47.3
4	36182385	chr4:36182385:C:T	T	C	0.218412	1.21e-05	0.6447	0
21	33800454	chr21:33800454:A:G	G	A	0.312472	1.213e-05	0.9488	0
8	15252962	chr8:15252962:G:A	A	G	0.221061	1.218e-05	0.8869	0
12	103370808	chr12:103370808:G:A	A	G	-0.250001	1.218e-05	0.4186	0
3	186080236	chr3:186080236:C:T	T	C	-0.282496	1.223e-05	0.9646	0
1	187409232	chr1:187409232:T:G	G	T	0.621651	1.228e-05	0.9106	0
10	49239347	chr10:49239347:G:T	T	G	0.569057	1.23e-05	0.8442	0
6	6433305	chr6:6433305:G:A	A	G	0.195731	1.231e-05	0.4193	0
3	184283358	chr3:184283358:C:T	T	C	-0.193342	1.243e-05	0.8534	0
11	27443325	chr11:27443325:C:T	T	C	-0.319792	1.247e-05	0.2183	32.34
12	103280299	chr12:103280299:G:A	A	G	-0.253216	1.248e-05	0.8015	0
1	177904248	chr1:177904248:T:A	A	T	0.211476	1.249e-05	0.9459	0
9	10479527	chr9:10479527:T:C	C	T	-0.323655	1.251e-05	0.931	0
21	33542291	chr21:33542291:G:A	A	G	0.315905	1.251e-05	0.3288	13.38
12	103329154	chr12:103329154:G:A	A	G	-0.2567	1.255e-05	0.9922	0
18	3384178	chr18:3384178:G:A	A	G	-0.269842	1.255e-05	0.6293	0
5	166093194	chr5:166093194:G:T	T	G	-0.492495	1.256e-05	0.445	0
10	132942509	chr10:132942509:T:C	C	T	-0.192493	1.26e-05	0.7211	0
16	30918123	chr16:30918123:C:T	T	C	-0.202239	1.26e-05	0.4696	0
3	186053849	chr3:186053849:C:T	T	C	-0.281038	1.262e-05	0.7996	0
2	653623	chr2:653623:C:G	G	C	-0.202361	1.268e-05	0.3721	6.09
21	33418552	chr21:33418552:G:C	C	G	0.339895	1.281e-05	0.3011	17.84
1	187399251	chr1:187399251:T:C	C	T	0.654042	1.283e-05	0.8707	0
3	17960304	chr3:17960304:T:G	G	T	1.29555	1.284e-05	0.2686	18.29
12	103326880	chr12:103326880:C:A	A	C	-0.256571	1.288e-05	0.992	0
6	6545410	chr6:6545410:T:C	C	T	0.356625	1.289e-05	0.6861	0
4	45182425	chr4:45182425:G:A	A	G	-0.19638	1.292e-05	0.673	0
11	47372087	chr11:47372087:T:C	C	T	-0.204444	1.294e-05	0.1181	45.64
14	25479813	chr14:25479813:T:G	G	T	0.203349	1.295e-05	0.7711	0
16	30991343	chr16:30991343:A:G	G	A	-0.200893	1.296e-05	0.193	34.25
16	28532060	chr16:28532060:G:A	A	G	0.200898	1.3e-05	0.8956	0
4	126630361	chr4:126630361:G:A	A	G	-0.227026	1.301e-05	0.1238	44.74
10	49236960	chr10:49236960:G:C	C	G	0.566903	1.301e-05	0.8421	0
3	186094380	chr3:186094380:C:G	G	C	-0.280905	1.309e-05	0.93	0
7	13437081	chr7:13437081:C:T	T	C	-0.190676	1.312e-05	0.9653	0
11	47861785	chr11:47861785:C:T	T	C	-0.220397	1.312e-05	0.5606	0
5	148476959	chr5:148476959:G:A	A	G	-0.196867	1.314e-05	0.9044	0
15	56781386	chr15:56781386:T:G	G	T	-0.202973	1.316e-05	0.7614	0
4	45328734	chr4:45328734:A:G	G	A	0.212204	1.317e-05	0.4996	0
16	30863896	chr16:30863896:T:C	C	T	-0.210968	1.323e-05	0.7844	0
11	27633771	chr11:27633771:C:T	T	C	0.206119	1.329e-05	0.012	68.9
1	174372698	chr1:174372698:T:G	G	T	-0.497252	1.333e-05	0.796	0
11	47814474	chr11:47814474:G:A	A	G	-0.221395	1.347e-05	0.62	0
16	28368122	chr16:28368122:A:G	G	A	0.207258	1.349e-05	0.7633	0
15	56781266	chr15:56781266:C:G	G	C	-0.202483	1.35e-05	0.7296	0
11	47767530	chr11:47767530:T:G	G	T	-0.220148	1.356e-05	0.5445	0
11	47444454	chr11:47444454:G:A	A	G	0.204654	1.378e-05	0.148	41
1	247910684	chr1:247910684:A:T	T	A	0.241219	1.383e-05	0.9879	0
11	47358510	chr11:47358510:A:C	C	A	-0.204322	1.385e-05	0.067	54.41
11	47752686	chr11:47752686:C:T	T	C	-0.220148	1.39e-05	0.5795	0
16	28338738	chr16:28338738:A:G	G	A	0.199588	1.39e-05	0.6312	0
3	184276010	chr3:184276010:G:T	T	G	-0.192736	1.391e-05	0.7345	0
11	47370328	chr11:47370328:G:A	A	G	-0.203586	1.396e-05	0.1211	45.16
12	128173695	chr12:128173695:A:G	G	A	0.206933	1.396e-05	0.5916	0
14	73249560	chr14:73249560:G:A	A	G	0.395145	1.397e-05	0.8174	0
16	30854705	chr16:30854705:T:A	A	T	-0.210351	1.4e-05	0.7898	0
7	13436881	chr7:13436881:T:C	C	T	-0.190072	1.404e-05	0.968	0
2	198361781	chr2:198361781:C:A	A	C	-0.336032	1.405e-05	0.9686	0
4	126635880	chr4:126635880:T:C	C	T	-0.224519	1.41e-05	0.1821	35.87
11	47361724	chr11:47361724:T:C	C	T	-0.203709	1.412e-05	0.1228	44.91
6	82004767	chr6:82004767:A:G	G	A	0.194085	1.413e-05	0.2185	30.45
6	98041685	chr6:98041685:T:C	C	T	-0.192736	1.426e-05	0.3809	4.54
21	33819543	chr21:33819543:A:G	G	A	0.355224	1.428e-05	0.5526	0
11	47427550	chr11:47427550:T:G	G	T	0.20392	1.431e-05	0.1553	39.9
16	30912281	chr16:30912281:A:T	T	A	-0.206164	1.435e-05	0.7415	0
18	60181298	chr18:60181298:T:C	C	T	0.221622	1.45e-05	0.0629	55.2
7	76938758	chr7:76938758:C:T	T	C	-0.266573	1.451e-05	0.8676	0
11	47814750	chr11:47814750:T:A	A	T	-0.220522	1.455e-05	0.6164	0
11	47860789	chr11:47860789:G:A	A	G	-0.195285	1.46e-05	0.2106	31.63
2	38128613	chr2:38128613:A:C	C	A	-0.200526	1.464e-05	0.9417	0
16	30811841	chr16:30811841:G:A	A	G	0.202206	1.465e-05	0.8059	0
16	28518628	chr16:28518628:T:C	C	T	0.198851	1.468e-05	0.8877	0
7	91510518	chr7:91510518:C:T	T	C	0.786182	1.473e-05	0.7557	0
8	15251666	chr8:15251666:T:A	A	T	0.191116	1.473e-05	0.3882	3.24
10	49222635	chr10:49222635:G:A	A	G	0.563949	1.477e-05	0.8385	0
10	49222636	chr10:49222636:C:A	A	C	0.563835	1.481e-05	0.8385	0
6	98009480	chr6:98009480:G:A	A	G	-0.191645	1.492e-05	0.4071	0
16	31011318	chr16:31011318:G:A	A	G	0.213093	1.492e-05	0.2552	24.93
6	82007201	chr6:82007201:A:G	G	A	0.193591	1.495e-05	0.1938	34.13
11	47369141	chr11:47369141:A:G	G	A	-0.202851	1.502e-05	0.1244	44.64
1	174401353	chr1:174401353:A:C	C	A	-0.495937	1.504e-05	0.8056	0
6	82004856	chr6:82004856:G:A	A	G	0.193509	1.507e-05	0.1926	34.31
16	30817351	chr16:30817351:G:T	T	G	0.201879	1.512e-05	0.815	0
7	84065297	chr7:84065297:A:G	G	A	0.258356	1.515e-05	0.0156	71.1
21	33464741	chr21:33464741:T:C	C	T	0.328944	1.516e-05	0.1844	35.52
1	213369741	chr1:213369741:T:C	C	T	-0.205918	1.534e-05	0.3925	2.47
19	47045897	chr19:47045897:A:G	G	A	0.188966	1.537e-05	0.5124	0
11	47759202	chr11:47759202:G:T	T	G	-0.219152	1.539e-05	0.5608	0
4	25358009	chr4:25358009:G:A	A	G	-0.200771	1.54e-05	0.6555	0
11	47369488	chr11:47369488:C:T	T	C	-0.202483	1.543e-05	0.1258	44.43
18	60071370	chr18:60071370:T:G	G	T	0.208395	1.544e-05	0.4173	0
8	18492792	chr8:18492792:T:G	G	T	0.459006	1.549e-05	0.4062	0
16	30838921	chr16:30838921:C:T	T	C	0.200898	1.557e-05	0.4762	0
10	7717033	chr10:7717033:T:C	C	T	-0.221395	1.563e-05	0.1603	39.14
1	213375078	chr1:213375078:C:T	T	C	0.201307	1.579e-05	0.5218	0
11	47738526	chr11:47738526:T:C	C	T	-0.218654	1.582e-05	0.613	0
11	47358064	chr11:47358064:G:A	A	G	-0.202728	1.585e-05	0.0695	53.95
16	30733505	chr16:30733505:C:T	T	C	-0.331286	1.588e-05	0.0602	59.45
10	23836772	chr10:23836772:A:T	T	A	-0.206532	1.589e-05	0.9005	0
4	25365396	chr4:25365396:G:A	A	G	-0.200526	1.592e-05	0.6579	0
11	27631591	chr11:27631591:G:A	A	G	0.204898	1.594e-05	0.0336	61.7
6	82009274	chr6:82009274:A:G	G	A	0.192849	1.601e-05	0.1886	34.91
16	28484431	chr16:28484431:C:T	T	C	0.207421	1.609e-05	0.5833	0
11	27683641	chr11:27683641:G:A	A	G	0.215031	1.616e-05	0.5273	0
5	148457046	chr5:148457046:C:T	T	C	0.195402	1.617e-05	0.6773	0
6	98033879	chr6:98033879:C:T	T	C	-0.190192	1.617e-05	0.4185	0
1	187417317	chr1:187417317:G:T	T	G	0.618046	1.618e-05	0.8781	0
6	98043334	chr6:98043334:G:A	A	G	-0.191524	1.619e-05	0.3759	5.42
1	213378683	chr1:213378683:C:T	T	C	0.199261	1.624e-05	0.3932	2.33
4	126615366	chr4:126615366:T:C	C	T	-0.214184	1.631e-05	0.2477	26.07
18	60130253	chr18:60130253:T:C	C	T	0.225541	1.633e-05	0.3969	1.67
21	37995875	chr21:37995875:C:T	T	C	0.194826	1.637e-05	0.1829	35.75
18	60181418	chr18:60181418:A:G	G	A	0.22042	1.64e-05	0.0559	56.6
17	66628770	chr17:66628770:C:G	G	C	0.212285	1.65e-05	0.261	24.06
12	90852328	chr12:90852328:T:G	G	T	-0.197963	1.656e-05	0.3001	18
6	98027284	chr6:98027284:A:G	G	A	-0.191161	1.66e-05	0.4355	0
12	103289735	chr12:103289735:A:C	C	A	-0.257088	1.66e-05	0.9829	0
16	20403454	chr16:20403454:T:G	G	T	-0.218405	1.664e-05	0.6905	0
3	79811862	chr3:79811862:A:G	G	A	-0.209734	1.668e-05	0.6701	0
11	47800665	chr11:47800665:C:T	T	C	-0.218032	1.672e-05	0.5886	0
16	31129478	chr16:31129478:G:T	T	G	-0.205918	1.673e-05	0.2178	30.56
5	148459974	chr5:148459974:T:C	C	T	-0.192129	1.676e-05	0.6143	0
11	47368125	chr11:47368125:C:G	G	C	-0.201627	1.679e-05	0.1073	47.37
6	98039180	chr6:98039180:G:C	C	G	-0.191161	1.68e-05	0.3861	3.61
4	126612856	chr4:126612856:A:G	G	A	-0.212698	1.681e-05	0.2459	26.35
2	123582729	chr2:123582729:A:G	G	A	0.372873	1.686e-05	0.5638	0
2	233185568	chr2:233185568:G:C	C	G	-0.644929	1.687e-05	0.2084	36.81
12	90854170	chr12:90854170:G:A	A	G	-0.197841	1.689e-05	0.2991	18.14
2	123587950	chr2:123587950:A:G	G	A	0.348824	1.691e-05	0.4023	0.68
18	3375919	chr18:3375919:T:C	C	T	0.196389	1.691e-05	0.8582	0
11	47683463	chr11:47683463:C:A	A	C	0.189545	1.694e-05	0.078	52.38
15	56779058	chr15:56779058:T:G	G	T	-0.200282	1.697e-05	0.7059	0
4	126608205	chr4:126608205:T:C	C	T	-0.202851	1.701e-05	0.2491	25.86
6	97953971	chr6:97953971:T:C	C	T	0.189628	1.702e-05	0.5022	0
2	38125497	chr2:38125497:T:C	C	T	-0.198451	1.714e-05	0.8732	0
11	27631673	chr11:27631673:A:G	G	A	-0.203954	1.715e-05	0.0212	65.3
8	15254056	chr8:15254056:T:A	A	T	0.189711	1.723e-05	0.4533	0
7	76940458	chr7:76940458:A:G	G	A	-0.264356	1.724e-05	0.8493	0
7	76939283	chr7:76939283:T:C	C	T	-0.267879	1.726e-05	0.8889	0
1	197390869	chr1:197390869:G:A	A	G	-0.200771	1.727e-05	0.1804	36.12
4	36204668	chr4:36204668:T:G	G	T	0.215918	1.727e-05	0.4875	0
6	97954518	chr6:97954518:A:C	C	A	0.189545	1.727e-05	0.5008	0
11	47364372	chr11:47364372:G:A	A	G	-0.20016	1.732e-05	0.1886	34.91
8	15254758	chr8:15254758:C:T	T	C	0.221462	1.743e-05	0.5085	0
6	97954335	chr6:97954335:G:T	T	G	0.18938	1.75e-05	0.5011	0
21	37995843	chr21:37995843:A:G	G	A	0.192849	1.75e-05	0.147	41.16
22	30123991	chr22:30123991:T:C	C	T	0.300105	1.752e-05	0.7212	0
2	24815399	chr2:24815399:G:A	A	G	-0.212451	1.755e-05	0.1869	35.15
2	12202164	chr2:12202164:C:G	G	C	-0.333796	1.763e-05	0.0944	49.52
11	47364522	chr11:47364522:T:C	C	T	-0.199915	1.771e-05	0.1882	34.96
1	187407442	chr1:187407442:C:G	G	C	0.612642	1.783e-05	0.8722	0
11	27541835	chr11:27541835:G:T	T	G	-0.232437	1.787e-05	0.6346	0
11	47882534	chr11:47882534:G:A	A	G	-0.196015	1.788e-05	0.1633	38.68
6	97953932	chr6:97953932:T:C	C	T	0.189132	1.799e-05	0.5038	0
10	106582254	chr10:106582254:C:T	T	C	0.228569	1.8e-05	0.1518	40.43
16	16827027	chr16:16827027:A:C	C	A	-0.26566	1.802e-05	0.75	0
4	126642098	chr4:126642098:A:T	T	A	-0.223144	1.805e-05	0.2021	32.89
2	12211300	chr2:12211300:T:C	C	T	-0.331704	1.817e-05	0.1479	41.02
6	97953607	chr6:97953607:A:C	C	A	0.188966	1.819e-05	0.5036	0
3	85913020	chr3:85913020:C:T	T	C	0.310568	1.823e-05	0.4743	0
11	27557399	chr11:27557399:A:T	T	A	-0.232689	1.823e-05	0.3799	4.71
11	47416731	chr11:47416731:A:C	C	A	0.201552	1.823e-05	0.1486	40.92
16	31005649	chr16:31005649:T:C	C	T	0.201552	1.836e-05	0.1675	38.05
6	97951069	chr6:97951069:A:G	G	A	0.188966	1.838e-05	0.4724	0
5	170100536	chr5:170100536:C:T	T	C	-0.378482	1.841e-05	0.8923	0
6	98040765	chr6:98040765:C:A	A	C	-0.190192	1.841e-05	0.3729	5.93
12	103281292	chr12:103281292:T:C	C	T	-0.255667	1.843e-05	0.9845	0
12	103338678	chr12:103338678:A:T	T	A	-0.254763	1.844e-05	0.4325	0
2	24795387	chr2:24795387:T:C	C	T	-0.211586	1.846e-05	0.1648	38.46
16	28496727	chr16:28496727:A:G	G	A	0.196635	1.846e-05	0.4264	0
4	36137547	chr4:36137547:T:C	C	T	0.213093	1.848e-05	0.8033	0
4	126639962	chr4:126639962:A:G	G	A	-0.22152	1.85e-05	0.1745	37
11	47684589	chr11:47684589:A:G	G	A	0.188718	1.851e-05	0.0793	52.14
1	67526879	chr1:67526879:G:A	A	G	0.475426	1.853e-05	0.7657	0
11	47701246	chr11:47701246:G:A	A	G	-0.190555	1.864e-05	0.1414	42
6	97957275	chr6:97957275:T:A	A	T	0.188718	1.865e-05	0.5023	0
3	79792979	chr3:79792979:G:T	T	G	-0.208132	1.866e-05	0.721	0
6	97954562	chr6:97954562:T:C	C	T	0.188718	1.871e-05	0.4994	0
2	12211324	chr2:12211324:C:T	T	C	-0.331286	1.872e-05	0.1479	41.02
11	27665357	chr11:27665357:T:C	C	T	-0.204813	1.873e-05	0.675	0
6	97948475	chr6:97948475:A:G	G	A	0.188718	1.876e-05	0.4986	0
1	213371483	chr1:213371483:A:G	G	A	-0.204935	1.879e-05	0.3714	6.21
13	20957770	chr13:20957770:A:G	G	A	-0.263966	1.882e-05	0.6996	0
11	47702386	chr11:47702386:A:G	G	A	0.188469	1.893e-05	0.0778	52.41
4	36186161	chr4:36186161:C:G	G	C	0.213497	1.898e-05	0.5225	0
2	12211372	chr2:12211372:C:T	T	C	-0.330868	1.902e-05	0.1484	40.94
16	28488338	chr16:28488338:A:T	T	A	0.207014	1.907e-05	0.5726	0
10	124898919	chr10:124898919:G:C	C	G	0.23602	1.909e-05	0.5993	0
18	60183350	chr18:60183350:C:A	A	C	0.21793	1.909e-05	0.0478	58.31
6	97947545	chr6:97947545:C:A	A	C	0.188469	1.913e-05	0.5078	0
4	25377097	chr4:25377097:C:T	T	C	-0.199549	1.915e-05	0.7084	0
11	47678616	chr11:47678616:G:T	T	G	-0.217286	1.916e-05	0.5423	0
4	36188968	chr4:36188968:A:G	G	A	0.213255	1.921e-05	0.5088	0
6	98009072	chr6:98009072:T:C	C	T	-0.188863	1.926e-05	0.3891	3.07
16	30959620	chr16:30959620:T:C	C	T	-0.196745	1.928e-05	0.2137	31.17
6	98017085	chr6:98017085:G:A	A	G	-0.192372	1.93e-05	0.5694	0
21	33796690	chr21:33796690:T:C	C	T	0.308514	1.936e-05	0.9566	0
16	31126391	chr16:31126391:C:T	T	C	-0.204199	1.939e-05	0.2237	29.68
4	60589535	chr4:60589535:G:A	A	G	0.330382	1.951e-05	0.8006	0
11	47433421	chr11:47433421:C:G	G	C	0.200489	1.952e-05	0.2279	29.05
2	24794991	chr2:24794991:C:T	T	C	-0.210968	1.958e-05	0.1653	38.38
3	186067759	chr3:186067759:C:G	G	C	0.232698	1.959e-05	0.9982	0
11	64650833	chr11:64650833:G:A	A	G	-0.225772	1.96e-05	0.9102	0
2	123598879	chr2:123598879:T:C	C	T	0.346705	1.97e-05	0.3952	1.97
11	27688083	chr11:27688083:C:G	G	C	0.212608	1.972e-05	0.4962	0
3	79786915	chr3:79786915:C:T	T	C	-0.207393	1.981e-05	0.719	0
5	148457317	chr5:148457317:C:T	T	C	0.193921	1.982e-05	0.6619	0
5	170113912	chr5:170113912:G:T	T	G	-0.364707	1.982e-05	0.9816	0
1	187415679	chr1:187415679:A:G	G	A	0.610418	1.983e-05	0.8946	0
12	74996116	chr12:74996116:G:A	A	G	-0.281435	1.984e-05	0.0125	68.66
2	12254286	chr2:12254286:A:C	C	A	0.347624	1.985e-05	0.4809	0
14	79473182	chr14:79473182:C:T	T	C	0.225062	1.988e-05	0.5628	0
19	44572689	chr19:44572689:A:T	T	A	0.215434	1.989e-05	0.5292	0
5	77149545	chr5:77149545:C:T	T	C	0.205794	1.995e-05	0.0745	53.01
16	28872006	chr16:28872006:T:C	C	T	0.200816	1.997e-05	0.4893	0
3	184282831	chr3:184282831:G:T	T	G	-0.186812	1.999e-05	0.9272	0
16	30807341	chr16:30807341:C:T	T	C	0.196389	1.999e-05	0.7563	0
6	81997055	chr6:81997055:C:A	A	C	0.189545	2.002e-05	0.4148	0
6	97958974	chr6:97958974:T:C	C	T	0.188055	2.002e-05	0.4982	0
6	97950956	chr6:97950956:C:T	T	C	0.188221	2.004e-05	0.4727	0
11	47644134	chr11:47644134:G:A	A	G	0.193179	2.008e-05	0.3219	14.51
19	29837846	chr19:29837846:C:T	T	C	0.211314	2.01e-05	0.3107	16.3
3	184277553	chr3:184277553:C:T	T	C	-0.184885	2.011e-05	0.9355	0
16	28481189	chr16:28481189:C:A	A	C	0.205305	2.018e-05	0.6058	0
2	12207375	chr2:12207375:T:C	C	T	-0.329616	2.02e-05	0.0827	51.53
12	90840775	chr12:90840775:T:A	A	T	-0.194435	2.025e-05	0.321	14.65
12	103308066	chr12:103308066:A:T	T	A	-0.249359	2.027e-05	0.9846	0
18	60183864	chr18:60183864:T:C	C	T	0.216803	2.054e-05	0.0546	56.87
12	23843594	chr12:23843594:C:T	T	C	0.221142	2.055e-05	0.9008	0
6	6470959	chr6:6470959:G:A	A	G	0.204165	2.058e-05	0.2506	26.88
18	60084728	chr18:60084728:T:C	C	T	0.213739	2.066e-05	0.4015	0.83
8	60896111	chr8:60896111:A:C	C	A	0.196142	2.068e-05	0.6754	0
11	19709280	chr11:19709280:C:T	T	C	0.281865	2.068e-05	0.0039	77.58
11	47426946	chr11:47426946:T:C	C	T	0.199998	2.07e-05	0.1361	42.82
21	33802876	chr21:33802876:A:G	G	A	0.301437	2.07e-05	0.927	0
3	79781486	chr3:79781486:A:G	G	A	-0.206901	2.073e-05	0.7223	0
7	76949154	chr7:76949154:T:C	C	T	-0.262014	2.074e-05	0.8413	0
1	174429752	chr1:174429752:T:A	A	T	-0.493641	2.079e-05	0.7309	0
11	27632053	chr11:27632053:C:T	T	C	0.201879	2.081e-05	0.0166	66.94
6	97951728	chr6:97951728:T:C	C	T	0.187806	2.087e-05	0.478	0
16	31043286	chr16:31043286:C:T	T	C	0.195731	2.087e-05	0.2928	19.15
6	97949944	chr6:97949944:C:T	T	C	0.187641	2.092e-05	0.4978	0
16	31038702	chr16:31038702:C:A	A	C	0.195731	2.092e-05	0.3038	17.4
11	47814169	chr11:47814169:A:C	C	A	-0.217286	2.1e-05	0.7697	0
20	19960723	chr20:19960723:C:T	T	C	-0.593845	2.103e-05	0.4153	0
1	213362884	chr1:213362884:C:T	T	C	-0.199183	2.107e-05	0.6145	0
16	28933075	chr16:28933075:C:G	G	C	-0.224019	2.107e-05	0.2525	25.35
5	170094828	chr5:170094828:G:A	A	G	-0.374257	2.11e-05	0.8808	0
6	97959063	chr6:97959063:G:A	A	G	0.187558	2.111e-05	0.4924	0
12	103298958	chr12:103298958:A:G	G	A	-0.259678	2.111e-05	0.9927	0
18	60094292	chr18:60094292:C:T	T	C	0.214305	2.113e-05	0.2691	22.82
6	97956298	chr6:97956298:T:C	C	T	0.187558	2.117e-05	0.4956	0
6	97956027	chr6:97956027:T:C	C	T	0.187558	2.118e-05	0.4958	0
6	97948300	chr6:97948300:G:A	A	G	0.187475	2.12e-05	0.4911	0
15	52251927	chr15:52251927:A:C	C	A	0.394876	2.121e-05	0.356	7.42
18	60068320	chr18:60068320:G:T	T	G	0.20498	2.134e-05	0.3602	8.14
5	87119432	chr5:87119432:T:G	G	T	-0.512828	2.143e-05	0.5235	0
11	47675044	chr11:47675044:A:T	T	A	-0.216044	2.143e-05	0.5402	0
11	47674288	chr11:47674288:G:A	A	G	-0.21592	2.147e-05	0.5444	0
13	105872225	chr13:105872225:C:T	T	C	0.251692	2.147e-05	0.3845	1.53
11	47679976	chr11:47679976:C:A	A	C	0.187309	2.149e-05	0.0918	49.97
6	97957338	chr6:97957338:C:G	G	C	0.187392	2.152e-05	0.4947	0
3	86113446	chr3:86113446:G:T	T	G	0.300771	2.156e-05	0.6365	0
14	25479224	chr14:25479224:G:A	A	G	0.197867	2.157e-05	0.8172	0
3	79782240	chr3:79782240:G:A	A	G	-0.206532	2.159e-05	0.7224	0
6	97951736	chr6:97951736:T:A	A	T	0.187475	2.168e-05	0.4695	0
12	103280176	chr12:103280176:T:G	G	T	-0.251543	2.17e-05	0.9987	0
2	123541527	chr2:123541527:A:G	G	A	0.199097	2.174e-05	0.6217	0
6	50683386	chr6:50683386:A:G	G	A	0.336258	2.181e-05	0.0578	59.96
16	31110472	chr16:31110472:G:A	A	G	-0.201749	2.182e-05	0.2133	31.23
5	170098470	chr5:170098470:A:T	T	A	-0.37324	2.183e-05	0.8805	0
14	79478819	chr14:79478819:A:G	G	A	0.222663	2.183e-05	0.5617	0
16	31119853	chr16:31119853:G:A	A	G	-0.202973	2.183e-05	0.1963	33.75
18	60181790	chr18:60181790:G:A	A	G	0.217125	2.188e-05	0.046	58.72
10	49234140	chr10:49234140:C:T	T	C	0.541277	2.201e-05	0.8251	0
16	28497126	chr16:28497126:A:G	G	A	0.193591	2.201e-05	0.6364	0
5	170092911	chr5:170092911:C:T	T	C	-0.383899	2.211e-05	0.8789	0
10	49232771	chr10:49232771:T:C	C	T	0.541044	2.211e-05	0.8247	0
3	184282013	chr3:184282013:C:T	T	C	-0.185727	2.213e-05	0.9324	0
3	86085218	chr3:86085218:A:G	G	A	0.30822	2.214e-05	0.4879	0
10	49222404	chr10:49222404:C:T	T	C	0.552217	2.214e-05	0.8307	0
6	97951531	chr6:97951531:C:T	T	C	0.187226	2.217e-05	0.4687	0
12	103309703	chr12:103309703:A:G	G	A	-0.247821	2.226e-05	0.969	0
12	90850133	chr12:90850133:G:A	A	G	-0.194678	2.229e-05	0.2607	24.11
10	49239050	chr10:49239050:G:A	A	G	0.541277	2.23e-05	0.8259	0
16	28914657	chr16:28914657:T:C	C	T	-0.221021	2.235e-05	0.297	18.48
16	28485738	chr16:28485738:T:A	A	T	0.204165	2.238e-05	0.5886	0
8	18492652	chr8:18492652:A:T	T	A	0.449865	2.243e-05	0.3892	3.06
16	30985551	chr16:30985551:G:C	C	G	-0.195042	2.247e-05	0.1871	35.12
4	25355442	chr4:25355442:G:A	A	G	-0.196867	2.252e-05	0.6804	0
5	77150878	chr5:77150878:A:G	G	A	0.204654	2.253e-05	0.0933	49.71
16	28908020	chr16:28908020:A:G	G	A	-0.218778	2.253e-05	0.314	15.77
7	67544766	chr7:67544766:A:G	G	A	-0.318004	2.258e-05	0.3333	12.65
6	6472908	chr6:6472908:C:T	T	C	0.203104	2.265e-05	0.2496	27.05
16	28326718	chr16:28326718:A:G	G	A	0.194579	2.266e-05	0.4217	0
6	50729606	chr6:50729606:C:A	A	C	-0.357247	2.277e-05	0.0881	54.12
6	81990021	chr6:81990021:G:C	C	G	0.188138	2.279e-05	0.2861	20.18
12	103360182	chr12:103360182:G:A	A	G	-0.251929	2.28e-05	0.5172	0
6	29938914	chr6:29938914:A:G	G	A	-0.192372	2.282e-05	0.013	68.43
16	28479196	chr16:28479196:T:C	C	T	0.20008	2.292e-05	0.4701	0
3	86122679	chr3:86122679:A:G	G	A	0.299364	2.295e-05	0.7022	0
18	60184530	chr18:60184530:A:G	G	A	0.21495	2.295e-05	0.0602	55.74
11	27606722	chr11:27606722:G:A	A	G	-0.352398	2.297e-05	0.4102	0
12	74993735	chr12:74993735:A:T	T	A	-0.279317	2.298e-05	0.0122	68.78
2	24796132	chr2:24796132:G:A	A	G	-0.209117	2.299e-05	0.1757	36.83
5	170083963	chr5:170083963:G:A	A	G	-0.367158	2.299e-05	0.9117	0
6	82012218	chr6:82012218:G:T	T	G	0.188304	2.304e-05	0.4238	0
11	47663802	chr11:47663802:C:T	T	C	0.186397	2.306e-05	0.0953	49.37
21	33494721	chr21:33494721:C:T	T	C	0.311008	2.307e-05	0.3774	5.16
8	960253	chr8:960253:C:T	T	C	0.187806	2.31e-05	0.971	0
6	97957461	chr6:97957461:C:G	G	C	0.186646	2.311e-05	0.5007	0
6	6411000	chr6:6411000:T:A	A	T	0.190868	2.314e-05	0.3982	1.44
7	76972446	chr7:76972446:G:C	C	G	-0.255796	2.331e-05	0.5772	0
16	31118574	chr16:31118574:A:G	G	A	-0.201015	2.334e-05	0.1987	33.39
1	61290306	chr1:61290306:T:G	G	T	0.305645	2.335e-05	0.2618	23.92
21	33493523	chr21:33493523:G:A	A	G	0.310641	2.335e-05	0.383	4.17
16	16830814	chr16:16830814:A:G	G	A	-0.264226	2.337e-05	0.7527	0
16	30903305	chr16:30903305:T:C	C	T	-0.195285	2.34e-05	0.485	0
18	60115879	chr18:60115879:A:G	G	A	0.211961	2.344e-05	0.2076	32.08
4	126621641	chr4:126621641:A:G	G	A	-0.210474	2.345e-05	0.2504	25.66
11	47673147	chr11:47673147:C:T	T	C	0.186314	2.362e-05	0.0922	49.9
18	30409173	chr18:30409173:T:A	A	T	0.221142	2.362e-05	0.3937	2.25
10	106587349	chr10:106587349:T:G	G	T	0.235309	2.37e-05	0.1212	45.15
3	79783150	chr3:79783150:A:G	G	A	-0.205426	2.373e-05	0.7167	0
3	79783200	chr3:79783200:G:A	A	G	-0.205426	2.377e-05	0.7157	0
4	126636577	chr4:126636577:T:G	G	T	-0.219774	2.377e-05	0.1824	35.83
6	97956470	chr6:97956470:T:C	C	T	0.186397	2.377e-05	0.4451	0
11	91299365	chr11:91299365:C:A	A	C	-0.860856	2.377e-05	0.9261	0
2	24818751	chr2:24818751:C:T	T	C	-0.208378	2.379e-05	0.2003	33.17
3	4199965	chr3:4199965:C:G	G	C	-0.199671	2.393e-05	0.3224	14.43
2	123590407	chr2:123590407:C:T	T	C	0.36714	2.394e-05	0.5376	0
8	930313	chr8:930313:C:G	G	C	0.208071	2.395e-05	0.8205	0
2	12286272	chr2:12286272:A:T	T	A	-0.29062	2.412e-05	0.3584	8.43
3	85362131	chr3:85362131:A:G	G	A	0.550373	2.415e-05	0.0241	80.34
13	105872535	chr13:105872535:A:C	C	A	0.252469	2.424e-05	0.492	0
12	128177225	chr12:128177225:T:A	A	T	0.201143	2.43e-05	0.4482	0
21	33463628	chr21:33463628:G:A	A	G	0.291624	2.43e-05	0.4456	0
4	45241770	chr4:45241770:G:A	A	G	0.202288	2.433e-05	0.4169	0
12	103300821	chr12:103300821:T:A	A	T	-0.2518	2.436e-05	0.9825	0
6	81996904	chr6:81996904:T:C	C	T	0.187806	2.438e-05	0.3578	8.53
1	213374832	chr1:213374832:C:G	G	C	-0.199915	2.441e-05	0.3296	13.25
12	90844143	chr12:90844143:T:A	A	T	-0.189588	2.446e-05	0.2993	18.12
3	79809343	chr3:79809343:A:T	T	A	-0.205672	2.448e-05	0.7407	0
18	60113094	chr18:60113094:A:G	G	A	0.219778	2.452e-05	0.2655	23.37
12	103308825	chr12:103308825:A:G	G	A	-0.24654	2.454e-05	0.9702	0
16	28899988	chr16:28899988:C:A	A	C	-0.217161	2.454e-05	0.3352	12.32
1	174560120	chr1:174560120:C:T	T	C	-0.485158	2.456e-05	0.6498	0
14	73045207	chr14:73045207:C:T	T	C	0.304687	2.457e-05	0.9599	0
4	36123868	chr4:36123868:C:T	T	C	0.213416	2.467e-05	0.8344	0
3	86121094	chr3:86121094:A:G	G	A	0.25797	2.472e-05	0.6425	0
3	4295869	chr3:4295869:A:G	G	A	0.198195	2.475e-05	0.5947	0
12	23308415	chr12:23308415:A:G	G	A	-0.533071	2.475e-05	0.2385	28.02
6	81997437	chr6:81997437:T:C	C	T	0.187806	2.476e-05	0.3493	9.98
11	47354812	chr11:47354812:A:G	G	A	-0.197719	2.476e-05	0.0697	53.9
6	97997132	chr6:97997132:C:A	A	C	0.185815	2.477e-05	0.5043	0
21	38920780	chr21:38920780:C:T	T	C	0.189876	2.477e-05	0.2075	32.09
5	96306815	chr5:96306815:T:G	G	T	0.20945	2.478e-05	0.2347	28.04
2	24794488	chr2:24794488:G:T	T	G	-0.208378	2.48e-05	0.1669	38.15
11	47664277	chr11:47664277:C:T	T	C	0.185732	2.481e-05	0.094	49.58
6	30151299	chr6:30151299:C:T	T	C	0.397567	2.483e-05	0.193	36.52
11	8394952	chr11:8394952:C:T	T	C	-0.213441	2.485e-05	0.5899	0
3	79806576	chr3:79806576:T:C	C	T	-0.205426	2.489e-05	0.7315	0
7	105476012	chr7:105476012:G:A	A	G	0.25936	2.495e-05	0.1915	34.47
16	28903896	chr16:28903896:G:A	A	G	-0.217161	2.507e-05	0.338	11.87
12	128086659	chr12:128086659:G:T	T	G	0.191281	2.508e-05	0.5235	0
4	2020647	chr4:2020647:T:C	C	T	0.393123	2.523e-05	0.4283	0
21	38920588	chr21:38920588:C:T	T	C	0.189628	2.525e-05	0.206	32.31
18	60068560	chr18:60068560:C:T	T	C	0.203186	2.527e-05	0.3316	12.92
6	82012719	chr6:82012719:T:C	C	T	0.187392	2.529e-05	0.4088	0
7	84156518	chr7:84156518:T:G	G	T	0.215918	2.534e-05	0.4315	0
21	33490182	chr21:33490182:C:T	T	C	0.309321	2.536e-05	0.404	0.38
18	60068713	chr18:60068713:T:C	C	T	0.203104	2.54e-05	0.3319	12.87
4	126619799	chr4:126619799:T:C	C	T	-0.209364	2.542e-05	0.3104	16.36
18	60069038	chr18:60069038:G:A	A	G	0.203104	2.542e-05	0.3217	14.54
14	73069104	chr14:73069104:A:G	G	A	0.304244	2.544e-05	0.9637	0
3	79801090	chr3:79801090:A:G	G	A	-0.204813	2.546e-05	0.7668	0
18	60182196	chr18:60182196:C:T	T	C	0.214869	2.547e-05	0.0427	59.47
16	30822591	chr16:30822591:G:A	A	G	-0.201994	2.555e-05	0.8018	0
6	97990690	chr6:97990690:A:T	T	A	0.185483	2.56e-05	0.5119	0
16	28904206	chr16:28904206:G:A	A	G	-0.217286	2.561e-05	0.3638	7.52
3	86090899	chr3:86090899:G:A	A	G	0.298399	2.568e-05	0.6581	0
10	7712402	chr10:7712402:A:G	G	A	-0.215175	2.571e-05	0.1399	42.24
11	47658428	chr11:47658428:A:G	G	A	-0.187776	2.571e-05	0.1566	39.69
3	154051195	chr3:154051195:A:C	C	A	0.19721	2.572e-05	0.3752	5.55
11	47370563	chr11:47370563:G:A	A	G	-0.196623	2.574e-05	0.1527	40.28
11	40303470	chr11:40303470:C:T	T	C	0.558301	2.582e-05	0.1684	40.55
3	79809600	chr3:79809600:C:T	T	C	-0.205058	2.588e-05	0.7376	0
7	84157144	chr7:84157144:A:G	G	A	0.215595	2.588e-05	0.4383	0
3	184278066	chr3:184278066:G:A	A	G	-0.184043	2.594e-05	0.9401	0
7	77069554	chr7:77069554:T:C	C	T	0.232381	2.594e-05	0.4789	0
2	123563284	chr2:123563284:A:C	C	A	0.338969	2.595e-05	0.5411	0
3	4295274	chr3:4295274:G:C	C	G	0.197703	2.607e-05	0.5998	0
11	47505500	chr11:47505500:G:T	T	G	0.199506	2.617e-05	0.5034	0
4	126578413	chr4:126578413:T:C	C	T	-0.21406	2.62e-05	0.0939	49.61
21	33495841	chr21:33495841:A:C	C	A	0.298474	2.621e-05	0.7089	0
18	60068443	chr18:60068443:C:G	G	C	0.202696	2.63e-05	0.3323	12.81
12	103359902	chr12:103359902:A:G	G	A	-0.250772	2.632e-05	0.4377	0
16	28329464	chr16:28329464:C:T	T	C	0.192932	2.632e-05	0.4133	0
16	30824642	chr16:30824642:G:A	A	G	-0.201871	2.632e-05	0.7852	0
21	38920776	chr21:38920776:T:C	C	T	0.189214	2.632e-05	0.2089	31.88
2	24817554	chr2:24817554:G:A	A	G	-0.20727	2.652e-05	0.1996	33.27
8	104259972	chr8:104259972:A:G	G	A	0.192189	2.655e-05	0.9482	0
16	20078659	chr16:20078659:G:A	A	G	0.188718	2.66e-05	0.6285	0
1	213375446	chr1:213375446:C:T	T	C	0.192519	2.666e-05	0.3599	8.19
21	38919035	chr21:38919035:C:T	T	C	0.189132	2.667e-05	0.2069	32.18
21	33492118	chr21:33492118:A:G	G	A	0.308367	2.668e-05	0.4094	0
21	38919263	chr21:38919263:T:C	C	T	0.189132	2.668e-05	0.2091	31.85
2	43199478	chr2:43199478:C:T	T	C	-0.187294	2.67e-05	0.1455	41.38
18	3375645	chr18:3375645:T:A	A	T	0.191446	2.671e-05	0.8098	0
2	123568893	chr2:123568893:T:A	A	T	0.338328	2.679e-05	0.5379	0
16	28496748	chr16:28496748:C:T	T	C	0.197046	2.682e-05	0.5491	0
14	73075942	chr14:73075942:A:G	G	A	0.303432	2.689e-05	0.964	0
1	174502731	chr1:174502731:T:C	C	T	-0.48321	2.696e-05	0.7268	0
3	85915374	chr3:85915374:T:A	A	T	0.304834	2.696e-05	0.4389	0
12	128086229	chr12:128086229:G:A	A	G	0.190455	2.696e-05	0.5142	0
6	97991276	chr6:97991276:T:A	A	T	0.184985	2.698e-05	0.5138	0
4	126619063	chr4:126619063:C:T	T	C	-0.208501	2.699e-05	0.2687	22.88
3	186107114	chr3:186107114:C:T	T	C	0.221462	2.711e-05	0.6438	0
6	97989899	chr6:97989899:T:C	C	T	0.184902	2.712e-05	0.5112	0
11	8397088	chr11:8397088:C:T	T	C	-0.212575	2.716e-05	0.5577	0
14	73252570	chr14:73252570:C:T	T	C	0.307926	2.719e-05	0.9228	0
3	186068207	chr3:186068207:T:C	C	T	0.225381	2.726e-05	0.9986	0
2	123538772	chr2:123538772:G:A	A	G	0.196635	2.733e-05	0.6613	0
5	158115446	chr5:158115446:C:T	T	C	0.192519	2.75e-05	0.9029	0
16	31113086	chr16:31113086:A:G	G	A	-0.192251	2.751e-05	0.0596	55.86
2	24818390	chr2:24818390:T:A	A	T	-0.211586	2.755e-05	0.3355	12.27
2	123538744	chr2:123538744:T:C	C	T	0.196553	2.759e-05	0.6601	0
4	126606949	chr4:126606949:A:G	G	A	-0.203218	2.761e-05	0.1379	42.55
6	81998834	chr6:81998834:T:C	C	T	0.186563	2.773e-05	0.3432	11
1	177895419	chr1:177895419:G:A	A	G	-0.187415	2.781e-05	0.3429	11.06
2	123566458	chr2:123566458:C:T	T	C	0.337614	2.782e-05	0.5411	0
18	30391708	chr18:30391708:T:C	C	T	0.219858	2.782e-05	0.3018	17.72
3	12755371	chr3:12755371:C:T	T	C	0.338114	2.789e-05	0.8947	0
6	50682987	chr6:50682987:G:C	C	G	0.331747	2.79e-05	0.0553	60.47
15	94771382	chr15:94771382:T:C	C	T	-0.212204	2.793e-05	0.538	0
15	48841332	chr15:48841332:T:C	C	T	0.629675	2.797e-05	0.5113	0
2	123566510	chr2:123566510:G:T	T	G	0.337472	2.806e-05	0.5408	0
2	123568169	chr2:123568169:C:T	T	C	0.337543	2.808e-05	0.5428	0
11	47353447	chr11:47353447:A:G	G	A	-0.199305	2.822e-05	0.0817	51.71
15	56779654	chr15:56779654:C:T	T	C	-0.194799	2.826e-05	0.6569	0
12	103369509	chr12:103369509:G:A	A	G	-0.239781	2.828e-05	0.4768	0
1	174583671	chr1:174583671:A:G	G	A	-0.484346	2.831e-05	0.732	0
2	123565866	chr2:123565866:T:C	C	T	0.337258	2.832e-05	0.5396	0
16	31097969	chr16:31097969:G:T	T	G	0.190786	2.836e-05	0.3571	8.66
19	47059252	chr19:47059252:T:C	C	T	0.190207	2.836e-05	0.6768	0
20	3167116	chr20:3167116:A:G	G	A	0.734913	2.837e-05	0.3229	0
12	103374093	chr12:103374093:G:A	A	G	-0.251286	2.839e-05	0.4309	0
1	22929650	chr1:22929650:G:A	A	G	-0.611383	2.84e-05	0.4079	0
21	33725224	chr21:33725224:C:T	T	C	0.313861	2.842e-05	0.7436	0
11	8395956	chr11:8395956:T:A	A	T	-0.211956	2.847e-05	0.5582	0
3	186100770	chr3:186100770:G:A	A	G	-0.272071	2.858e-05	0.892	0
2	123539652	chr2:123539652:C:A	A	C	0.196142	2.865e-05	0.6648	0
1	174583593	chr1:174583593:A:T	T	A	-0.484021	2.866e-05	0.7322	0
16	31130672	chr16:31130672:C:T	T	C	-0.201504	2.868e-05	0.2091	31.85
18	60113021	chr18:60113021:T:C	C	T	0.209045	2.872e-05	0.1696	37.74
4	60589185	chr4:60589185:C:A	A	C	0.321359	2.873e-05	0.8213	0
21	38921160	chr21:38921160:G:T	T	G	0.188304	2.88e-05	0.2195	30.3
1	174576767	chr1:174576767:C:T	T	C	-0.484021	2.885e-05	0.7385	0
14	73058764	chr14:73058764:G:A	A	G	0.302324	2.889e-05	0.9618	0
16	31079086	chr16:31079086:G:C	C	G	0.19532	2.889e-05	0.4372	0
19	29835693	chr19:29835693:A:G	G	A	0.207421	2.89e-05	0.2031	32.74
3	49902154	chr3:49902154:G:A	A	G	0.186397	2.891e-05	0.9607	0
16	28496323	chr16:28496323:C:G	G	C	0.192189	2.894e-05	0.3841	3.96
21	33487794	chr21:33487794:C:T	T	C	0.307926	2.894e-05	0.377	5.23
1	174575157	chr1:174575157:C:T	T	C	-0.483859	2.895e-05	0.738	0
6	50694959	chr6:50694959:T:C	C	T	0.337686	2.9e-05	0.0419	63.44
6	97985832	chr6:97985832:A:C	C	A	0.184236	2.901e-05	0.4965	0
7	76980982	chr7:76980982:A:G	G	A	-0.250386	2.905e-05	0.6674	0
19	47056885	chr19:47056885:A:C	C	A	0.190042	2.905e-05	0.3466	10.43
1	174575742	chr1:174575742:G:A	A	G	-0.483697	2.907e-05	0.7386	0
7	77068214	chr7:77068214:T:C	C	T	0.230874	2.912e-05	0.4573	0
6	50683624	chr6:50683624:G:A	A	G	0.331029	2.913e-05	0.0561	60.31
16	31117294	chr16:31117294:C:T	T	C	-0.191645	2.914e-05	0.0636	55.06
13	58889709	chr13:58889709:A:G	G	A	0.258588	2.919e-05	0.8875	0
16	31037834	chr16:31037834:A:G	G	A	0.191777	2.92e-05	0.2361	27.81
3	4287971	chr3:4287971:C:T	T	C	0.196389	2.925e-05	0.5669	0
1	213366188	chr1:213366188:A:G	G	A	-0.196623	2.927e-05	0.5812	0
14	73056053	chr14:73056053:G:A	A	G	0.301659	2.938e-05	0.9633	0
14	73158345	chr14:73158345:G:A	A	G	0.36804	2.945e-05	0.5332	0
13	58885800	chr13:58885800:C:T	T	C	0.256965	2.956e-05	0.8923	0
16	28329624	chr16:28329624:A:G	G	A	0.191612	2.959e-05	0.3893	3.04
3	33747361	chr3:33747361:A:G	G	A	0.342596	2.96e-05	0.3457	9.47
2	123565026	chr2:123565026:C:T	T	C	0.336544	2.967e-05	0.5387	0
2	198718371	chr2:198718371:C:T	T	C	-0.195772	2.967e-05	0.9921	0
16	31033362	chr16:31033362:A:G	G	A	0.19062	2.978e-05	0.3132	15.9
3	184278723	chr3:184278723:C:T	T	C	-0.182722	2.983e-05	0.9436	0
13	58883333	chr13:58883333:T:C	C	T	0.25681	2.983e-05	0.8892	0
3	86116693	chr3:86116693:A:T	T	A	0.290204	2.987e-05	0.7706	0
1	174569972	chr1:174569972:A:C	C	A	-0.482886	2.988e-05	0.7326	0
14	101830403	chr14:101830403:G:A	A	G	-0.239019	2.988e-05	0.1145	46.22
5	170115217	chr5:170115217:C:T	T	C	-0.363556	2.989e-05	0.9827	0
2	24800973	chr2:24800973:G:T	T	G	-0.206164	2.993e-05	0.199	33.35
3	4295321	chr3:4295321:C:T	T	C	0.196224	3.01e-05	0.6033	0
16	31038712	chr16:31038712:C:T	T	C	0.191446	3.013e-05	0.2362	27.81
2	12196429	chr2:12196429:A:G	G	A	0.260671	3.018e-05	0.2865	20.12
21	38921022	chr21:38921022:A:G	G	A	0.187806	3.022e-05	0.2204	30.17
12	103265175	chr12:103265175:A:C	C	A	-0.201749	3.036e-05	0.4962	0
2	230438277	chr2:230438277:G:C	C	G	0.630314	3.042e-05	0.4945	0
21	38920998	chr21:38920998:T:G	G	T	0.187724	3.055e-05	0.221	30.08
19	47056972	chr19:47056972:T:G	G	T	0.189463	3.057e-05	0.345	10.71
11	47444890	chr11:47444890:G:A	A	G	-0.20016	3.059e-05	0.1128	46.5
3	86089468	chr3:86089468:T:C	C	T	0.295501	3.065e-05	0.6492	0
1	12847526	chr1:12847526:T:C	C	T	0.30225	3.068e-05	0.5888	0
6	81998996	chr6:81998996:T:C	C	T	0.185566	3.068e-05	0.3393	11.64
19	47056952	chr19:47056952:G:A	A	G	0.189463	3.069e-05	0.3548	9.05
2	44886178	chr2:44886178:G:A	A	G	0.374456	3.08e-05	0.605	0
12	103258780	chr12:103258780:T:G	G	T	-0.20469	3.086e-05	0.2256	29.39
11	8508671	chr11:8508671:A:G	G	A	-0.182722	3.094e-05	0.1361	42.83
1	174420763	chr1:174420763:C:T	T	C	-0.487435	3.098e-05	0.6304	0
11	8407110	chr11:8407110:T:C	C	T	-0.211091	3.098e-05	0.4879	0
12	103262455	chr12:103262455:A:C	C	A	-0.205304	3.1e-05	0.2922	19.23
16	28881974	chr16:28881974:C:G	G	C	0.19606	3.1e-05	0.5755	0
16	30815884	chr16:30815884:A:G	G	A	0.192354	3.101e-05	0.6958	0
6	50697282	chr6:50697282:T:C	C	T	0.337186	3.102e-05	0.0362	64.83
4	36117450	chr4:36117450:T:C	C	T	0.211799	3.103e-05	0.7948	0
12	103362838	chr12:103362838:A:G	G	A	-0.249616	3.104e-05	0.4338	0
13	58892006	chr13:58892006:T:G	G	T	0.256346	3.104e-05	0.8932	0
3	49887507	chr3:49887507:T:C	C	T	0.184985	3.107e-05	0.9496	0
16	20094876	chr16:20094876:A:G	G	A	0.188055	3.108e-05	0.4197	0
2	123548236	chr2:123548236:A:G	G	A	0.19606	3.11e-05	0.6178	0
1	174413420	chr1:174413420:A:G	G	A	-0.48321	3.112e-05	0.6875	0
10	124952367	chr10:124952367:T:C	C	T	0.221382	3.121e-05	0.5877	0
14	73243144	chr14:73243144:C:T	T	C	0.367417	3.128e-05	0.5842	0
21	33432890	chr21:33432890:C:T	T	C	0.191777	3.137e-05	0.7949	0
2	123548571	chr2:123548571:A:G	G	A	0.195978	3.146e-05	0.6283	0
14	73052101	chr14:73052101:C:G	G	C	0.300623	3.147e-05	0.9669	0
3	86087631	chr3:86087631:A:T	T	A	0.295129	3.154e-05	0.6602	0
2	123558416	chr2:123558416:C:T	T	C	0.3354	3.156e-05	0.544	0
3	4295190	chr3:4295190:G:C	C	G	0.195567	3.156e-05	0.606	0
4	36191866	chr4:36191866:T:C	C	T	0.21277	3.165e-05	0.4908	0
4	60587716	chr4:60587716:A:C	C	A	0.319617	3.165e-05	0.7291	0
9	78328355	chr9:78328355:A:C	C	A	-0.307749	3.176e-05	0.804	0
2	123544961	chr2:123544961:G:A	A	G	0.195073	3.178e-05	0.6635	0
14	73244136	chr14:73244136:T:A	A	T	0.367417	3.181e-05	0.6578	0
14	73149927	chr14:73149927:G:A	A	G	0.366308	3.182e-05	0.4585	0
9	132591282	chr9:132591282:G:C	C	G	0.195402	3.192e-05	0.8536	0
11	8413530	chr11:8413530:C:T	T	C	-0.210721	3.192e-05	0.5408	0
11	8413531	chr11:8413531:A:C	C	A	-0.210721	3.192e-05	0.5408	0
11	6062717	chr11:6062717:C:A	A	C	-0.209241	3.193e-05	0.6611	0
16	28326722	chr16:28326722:T:C	C	T	0.191116	3.193e-05	0.4302	0
21	38919816	chr21:38919816:T:C	C	T	0.185815	3.195e-05	0.2005	33.13
14	73153854	chr14:73153854:C:T	T	C	0.366308	3.201e-05	0.5278	0
13	58894694	chr13:58894694:A:G	G	A	0.255804	3.204e-05	0.8938	0
1	174452765	chr1:174452765:G:A	A	G	-0.482076	3.21e-05	0.691	0
16	30826275	chr16:30826275:C:T	T	C	-0.199549	3.21e-05	0.8204	0
4	25323120	chr4:25323120:C:T	T	C	-0.189467	3.221e-05	0.9103	0
3	86114372	chr3:86114372:T:C	C	T	0.294236	3.227e-05	0.7133	0
4	45184236	chr4:45184236:C:T	T	C	-0.185727	3.23e-05	0.5524	0
3	4294748	chr3:4294748:G:A	A	G	0.19532	3.231e-05	0.5616	0
3	86088157	chr3:86088157:C:G	G	C	0.294757	3.231e-05	0.6605	0
1	174461685	chr1:174461685:G:A	A	G	-0.482238	3.239e-05	0.6982	0
8	15247782	chr8:15247782:T:A	A	T	0.211071	3.242e-05	0.7803	0
3	114413969	chr3:114413969:C:T	T	C	0.206119	3.244e-05	0.4736	0
1	174460276	chr1:174460276:G:A	A	G	-0.482238	3.252e-05	0.6983	0
2	617897	chr2:617897:G:A	A	G	0.180904	3.258e-05	0.9746	0
5	148476669	chr5:148476669:T:C	C	T	-0.186089	3.262e-05	0.9435	0
1	174402724	chr1:174402724:C:T	T	C	-0.482076	3.265e-05	0.6987	0
3	4194442	chr3:4194442:C:T	T	C	0.195238	3.268e-05	0.3434	10.97
10	7711110	chr10:7711110:A:C	C	A	-0.212698	3.271e-05	0.1386	42.43
13	58886497	chr13:58886497:T:G	G	T	0.255572	3.277e-05	0.8563	0
15	36153115	chr15:36153115:G:A	A	G	0.189214	3.28e-05	0.0861	50.95
21	33727395	chr21:33727395:G:A	A	G	0.305424	3.283e-05	0.7354	0
1	185457514	chr1:185457514:C:T	T	C	0.500715	3.289e-05	0.3105	16.2
6	50724847	chr6:50724847:A:T	T	A	-0.325038	3.292e-05	0.0531	60.93
1	174351592	chr1:174351592:C:A	A	C	-0.481914	3.294e-05	0.6871	0
4	126586360	chr4:126586360:A:T	T	A	-0.211709	3.295e-05	0.0732	53.25
2	26718614	chr2:26718614:C:T	T	C	-0.195285	3.296e-05	0.4144	0
11	6062804	chr11:6062804:G:T	T	G	-0.209241	3.298e-05	0.7583	0
1	174412256	chr1:174412256:G:A	A	G	-0.481752	3.3e-05	0.6773	0
14	73151860	chr14:73151860:C:T	T	C	0.365684	3.305e-05	0.5413	0
13	58766506	chr13:58766506:G:C	C	G	0.256733	3.309e-05	0.8375	0
6	108574183	chr6:108574183:C:T	T	C	0.190538	3.317e-05	0.0431	59.37
1	174406999	chr1:174406999:T:C	C	T	-0.481267	3.332e-05	0.7	0
1	177949686	chr1:177949686:A:G	G	A	-0.197719	3.332e-05	0.1613	38.98
3	12756248	chr3:12756248:T:G	G	T	0.33189	3.336e-05	0.8961	0
3	4201918	chr3:4201918:T:C	C	T	0.1968	3.338e-05	0.3522	9.49
7	13366752	chr7:13366752:T:C	C	T	0.290054	3.339e-05	0.3175	15.21
3	12756359	chr3:12756359:A:C	C	A	0.334756	3.342e-05	0.8957	0
12	90858715	chr12:90858715:G:C	C	G	-0.193099	3.349e-05	0.2908	19.46
11	47354897	chr11:47354897:G:A	A	G	-0.193221	3.352e-05	0.1184	45.59
16	30972891	chr16:30972891:G:A	A	G	-0.19407	3.354e-05	0.1893	34.8
13	58782615	chr13:58782615:G:A	A	G	0.272467	3.358e-05	0.3646	7.38
12	122286320	chr12:122286320:A:C	C	A	0.190538	3.361e-05	0.8065	0
1	50350111	chr1:50350111:C:T	T	C	-0.388313	3.365e-05	0.9687	0
16	31088538	chr16:31088538:G:A	A	G	0.193674	3.366e-05	0.4418	0
21	38921157	chr21:38921157:C:T	T	C	0.186728	3.367e-05	0.2275	29.1
3	86088255	chr3:86088255:G:T	T	G	0.294012	3.373e-05	0.6576	0
3	86124330	chr3:86124330:T:C	C	T	0.288182	3.376e-05	0.759	0
4	126572185	chr4:126572185:T:A	A	T	-0.210721	3.388e-05	0.1133	46.41
20	9553574	chr20:9553574:A:G	G	A	0.250292	3.397e-05	0.6328	0
1	174532226	chr1:174532226:T:G	G	T	-0.48062	3.399e-05	0.6849	0
16	31082633	chr16:31082633:C:T	T	C	0.188552	3.399e-05	0.2727	22.26
3	86158753	chr3:86158753:A:T	T	A	0.293266	3.405e-05	0.4254	0
1	174880342	chr1:174880342:C:G	G	C	-0.532049	3.407e-05	0.7228	0
1	174432041	chr1:174432041:G:A	A	G	-0.480943	3.409e-05	0.6843	0
1	174432172	chr1:174432172:C:T	T	C	-0.480943	3.417e-05	0.684	0
3	12757062	chr3:12757062:G:A	A	G	0.334327	3.421e-05	0.8849	0
19	29834472	chr19:29834472:G:A	A	G	0.20555	3.426e-05	0.2895	19.66
16	31117347	chr16:31117347:C:A	A	C	-0.189951	3.427e-05	0.0549	56.81
21	33794641	chr21:33794641:A:G	G	A	0.295576	3.432e-05	0.9408	0
4	25327384	chr4:25327384:C:T	T	C	-0.188984	3.441e-05	0.8863	0
1	174512691	chr1:174512691:T:A	A	T	-0.481914	3.451e-05	0.6994	0
20	9556155	chr20:9556155:C:G	G	C	0.248577	3.462e-05	0.6427	0
18	30397049	chr18:30397049:C:G	G	C	0.217206	3.464e-05	0.3958	1.87
4	25323563	chr4:25323563:A:G	G	A	-0.188742	3.465e-05	0.9101	0
14	73176960	chr14:73176960:T:C	C	T	0.364435	3.47e-05	0.5307	0
3	49922955	chr3:49922955:T:C	C	T	0.183238	3.474e-05	0.9659	0
3	49886991	chr3:49886991:G:A	A	G	0.183404	3.475e-05	0.99	0
10	78476511	chr10:78476511:C:T	T	C	-0.317042	3.476e-05	0.6456	0
5	148471707	chr5:148471707:A:T	T	A	-0.187294	3.48e-05	0.7021	0
2	810811	chr2:810811:G:A	A	G	0.226657	3.482e-05	0.7512	0
15	36153241	chr15:36153241:T:C	C	T	0.188552	3.484e-05	0.0864	50.89
3	85944570	chr3:85944570:G:C	C	G	0.297063	3.49e-05	0.4587	0
3	49898669	chr3:49898669:T:C	C	T	0.185234	3.493e-05	0.9395	0
16	69879385	chr16:69879385:C:T	T	C	0.351783	3.497e-05	0.1268	47.43
15	56777897	chr15:56777897:C:T	T	C	-0.192493	3.504e-05	0.683	0
1	174545297	chr1:174545297:A:T	T	A	-0.479165	3.505e-05	0.6905	0
1	12849586	chr1:12849586:T:C	C	T	0.300031	3.51e-05	0.5511	0
4	126590890	chr4:126590890:G:A	A	G	-0.211091	3.511e-05	0.0699	53.87
1	174439690	chr1:174439690:G:A	A	G	-0.480135	3.523e-05	0.6911	0
8	104274461	chr8:104274461:A:G	G	A	0.188718	3.528e-05	0.8363	0
1	174875250	chr1:174875250:G:A	A	G	-0.52577	3.529e-05	0.7201	0
16	69879447	chr16:69879447:T:C	C	T	0.351642	3.529e-05	0.1265	47.48
6	98015483	chr6:98015483:A:G	G	A	-0.186812	3.53e-05	0.5747	0
7	67536554	chr7:67536554:G:A	A	G	-0.310746	3.533e-05	0.4716	0
1	174458160	chr1:174458160:G:A	A	G	-0.480135	3.535e-05	0.6875	0
16	30995651	chr16:30995651:C:T	T	C	0.188801	3.535e-05	0.148	41
21	38920178	chr21:38920178:C:G	G	C	0.186065	3.535e-05	0.2061	32.29
1	174546811	chr1:174546811:A:T	T	A	-0.479165	3.544e-05	0.6911	0
1	174462735	chr1:174462735:C:T	T	C	-0.479812	3.545e-05	0.6851	0
11	8508378	chr11:8508378:A:T	T	A	-0.181282	3.557e-05	0.1365	42.76
3	12758604	chr3:12758604:G:A	A	G	0.333683	3.564e-05	0.8846	0
3	12755508	chr3:12755508:G:A	A	G	0.333468	3.569e-05	0.8903	0
1	174881584	chr1:174881584:T:C	C	T	-0.530688	3.583e-05	0.723	0
9	33409092	chr9:33409092:A:G	G	A	0.771589	3.601e-05	0.9049	0
14	73139123	chr14:73139123:A:T	T	A	0.364018	3.601e-05	0.5346	0
14	73134317	chr14:73134317:G:A	A	G	0.363948	3.604e-05	0.535	0
4	82480792	chr4:82480792:A:G	G	A	0.554345	3.613e-05	0.0606	55.65
8	15253141	chr8:15253141:T:A	A	T	0.202859	3.613e-05	0.6307	0
3	12759102	chr3:12759102:T:A	A	T	0.333181	3.614e-05	0.8902	0
14	73154195	chr14:73154195:A:G	G	A	0.36374	3.617e-05	0.5255	0
19	29834775	chr19:29834775:G:A	A	G	0.20498	3.618e-05	0.3096	16.48
3	12759298	chr3:12759298:G:C	C	G	0.333109	3.626e-05	0.8811	0
9	78326845	chr9:78326845:A:T	T	A	-0.305575	3.629e-05	0.8083	0
14	73139080	chr14:73139080:G:C	C	G	0.363879	3.631e-05	0.5345	0
1	174445351	chr1:174445351:C:T	T	C	-0.479327	3.633e-05	0.6885	0
1	174454640	chr1:174454640:C:T	T	C	-0.479165	3.634e-05	0.6917	0
1	174575055	chr1:174575055:C:T	T	C	-0.477713	3.639e-05	0.7313	0
10	106584801	chr10:106584801:A:G	G	A	0.246157	3.644e-05	0.3804	4.62
14	73161798	chr14:73161798:C:T	T	C	0.36374	3.645e-05	0.5292	0
1	174511291	chr1:174511291:T:C	C	T	-0.480135	3.647e-05	0.6993	0
5	147100241	chr5:147100241:A:G	G	A	0.403329	3.65e-05	0.0472	62.23
14	73145048	chr14:73145048:A:G	G	A	0.363601	3.652e-05	0.5293	0
3	12760054	chr3:12760054:G:A	A	G	0.332679	3.653e-05	0.8912	0
1	174481247	chr1:174481247:A:C	C	A	-0.478843	3.663e-05	0.681	0
16	69876389	chr16:69876389:C:G	G	C	0.350939	3.664e-05	0.13	46.89
3	184278280	chr3:184278280:C:T	T	C	-0.181042	3.666e-05	0.9541	0
6	97955146	chr6:97955146:C:T	T	C	0.181404	3.668e-05	0.607	0
14	73136423	chr14:73136423:C:T	T	C	0.363531	3.668e-05	0.5339	0
14	73160900	chr14:73160900:C:T	T	C	0.363601	3.673e-05	0.528	0
4	25325236	chr4:25325236:C:T	T	C	-0.188138	3.675e-05	0.8914	0
1	174555395	chr1:174555395:T:A	A	T	-0.477713	3.676e-05	0.6936	0
11	47585583	chr11:47585583:C:T	T	C	-0.20727	3.677e-05	0.4635	0
2	166289431	chr2:166289431:T:G	G	T	0.211395	3.68e-05	0.1201	45.33
14	73146334	chr14:73146334:C:T	T	C	0.363392	3.68e-05	0.5293	0
1	174417974	chr1:174417974:A:G	G	A	-0.478843	3.684e-05	0.693	0
19	47052904	chr19:47052904:A:G	G	A	0.189049	3.685e-05	0.328	13.51
14	73154207	chr14:73154207:A:G	G	A	0.363323	3.686e-05	0.525	0
8	104268729	chr8:104268729:T:C	C	T	0.188221	3.688e-05	0.8354	0
12	103362716	chr12:103362716:G:A	A	G	-0.246412	3.693e-05	0.523	0
8	104271477	chr8:104271477:T:G	G	T	0.188221	3.695e-05	0.8271	0
1	174359578	chr1:174359578:T:C	C	T	-0.478358	3.697e-05	0.6916	0
8	15254729	chr8:15254729:T:G	G	T	0.184486	3.697e-05	0.2216	29.98
1	174540248	chr1:174540248:G:C	C	G	-0.477552	3.701e-05	0.687	0
11	8508291	chr11:8508291:C:T	T	C	-0.181042	3.703e-05	0.1298	43.81
16	31106703	chr16:31106703:C:A	A	C	-0.188984	3.704e-05	0.0656	54.68
21	33417501	chr21:33417501:T:C	C	T	0.311374	3.712e-05	0.1644	38.52
4	25413484	chr4:25413484:T:C	C	T	-0.192493	3.715e-05	0.688	0
1	174464996	chr1:174464996:A:G	G	A	-0.47852	3.717e-05	0.6786	0
16	31133898	chr16:31133898:C:T	T	C	-0.199305	3.717e-05	0.187	35.15
4	60582693	chr4:60582693:G:A	A	G	0.316852	3.719e-05	0.6823	0
1	174369675	chr1:174369675:C:G	G	C	-0.478358	3.72e-05	0.6859	0
1	174520956	chr1:174520956:G:C	C	G	-0.478681	3.725e-05	0.7012	0
16	30974673	chr16:30974673:G:T	T	G	-0.192857	3.733e-05	0.2071	32.15
6	1057719	chr6:1057719:G:A	A	G	0.315613	3.738e-05	0.9371	0
1	174479772	chr1:174479772:A:T	T	A	-0.478197	3.739e-05	0.6784	0
14	73159589	chr14:73159589:A:G	G	A	0.362905	3.744e-05	0.5321	0
16	69880021	chr16:69880021:T:A	A	T	0.350446	3.745e-05	0.1328	46.42
14	73140063	chr14:73140063:A:G	G	A	0.363045	3.749e-05	0.5341	0
2	26730714	chr2:26730714:T:G	G	T	0.187806	3.75e-05	0.5561	0
7	76931785	chr7:76931785:G:C	C	G	-0.261884	3.751e-05	0.6985	0
14	73147679	chr14:73147679:C:T	T	C	0.362975	3.756e-05	0.5286	0
5	170116367	chr5:170116367:C:G	G	C	-0.357961	3.759e-05	0.9883	0
6	82014090	chr6:82014090:T:G	G	T	0.191446	3.763e-05	0.3625	7.75
14	73171921	chr14:73171921:G:C	C	G	0.363045	3.765e-05	0.554	0
1	174535096	chr1:174535096:G:A	A	G	-0.477069	3.768e-05	0.6921	0
16	31036009	chr16:31036009:T:C	C	T	0.188469	3.776e-05	0.2743	22.02
1	174554205	chr1:174554205:A:G	G	A	-0.47723	3.777e-05	0.6895	0
12	103261009	chr12:103261009:A:G	G	A	-0.199793	3.787e-05	0.4493	0
1	174368024	chr1:174368024:G:T	T	G	-0.477875	3.789e-05	0.6826	0
12	74992928	chr12:74992928:T:G	G	T	-0.294371	3.792e-05	0.0008	82.01
3	4259273	chr3:4259273:T:A	A	T	0.185815	3.796e-05	0.8886	0
21	38923238	chr21:38923238:T:C	C	T	0.185483	3.796e-05	0.2287	28.93
15	36100361	chr15:36100361:A:G	G	A	0.193014	3.8e-05	0.5625	0
1	174531845	chr1:174531845:T:C	C	T	-0.477069	3.802e-05	0.6941	0
2	186561946	chr2:186561946:C:T	T	C	-0.275227	3.808e-05	0.9056	0
13	58902618	chr13:58902618:A:G	G	A	0.253401	3.812e-05	0.8961	0
16	30958236	chr16:30958236:G:C	C	G	-0.192251	3.812e-05	0.1831	35.72
3	12759452	chr3:12759452:T:C	C	T	0.331819	3.816e-05	0.8987	0
1	174498861	chr1:174498861:G:C	C	G	-0.477713	3.817e-05	0.6899	0
16	31010559	chr16:31010559:G:T	T	G	0.189214	3.822e-05	0.0952	49.38
1	174552840	chr1:174552840:C:T	T	C	-0.476746	3.823e-05	0.694	0
7	67538301	chr7:67538301:T:G	G	T	-0.309246	3.824e-05	0.4657	0
14	25472948	chr14:25472948:C:T	T	C	-0.203463	3.825e-05	0.9186	0
1	174531962	chr1:174531962:A:G	G	A	-0.477069	3.827e-05	0.6935	0
12	23322951	chr12:23322951:A:C	C	A	-0.517682	3.827e-05	0.6702	0
1	174487218	chr1:174487218:G:T	T	G	-0.477391	3.828e-05	0.6836	0
3	186112102	chr3:186112102:T:A	A	T	0.204654	3.829e-05	0.5426	0
14	73244137	chr14:73244137:T:A	A	T	0.356485	3.834e-05	0.9212	0
8	104268821	chr8:104268821:G:A	A	G	0.187806	3.837e-05	0.8315	0
1	174549181	chr1:174549181:G:A	A	G	-0.476746	3.842e-05	0.6935	0
17	7093334	chr17:7093334:C:A	A	C	0.226418	3.843e-05	0.9031	0
1	174549515	chr1:174549515:C:T	T	C	-0.476585	3.848e-05	0.6936	0
3	195105408	chr3:195105408:C:T	T	C	0.185068	3.848e-05	0.3563	7.36
14	79470621	chr14:79470621:T:C	C	T	0.214869	3.85e-05	0.7431	0
7	67538735	chr7:67538735:C:T	T	C	-0.30911	3.854e-05	0.4707	0
5	148469327	chr5:148469327:C:T	T	C	-0.185968	3.856e-05	0.6894	0
1	169508095	chr1:169508095:G:A	A	G	-0.570399	3.864e-05	0.5884	0
9	33409070	chr9:33409070:T:G	G	T	0.768255	3.865e-05	0.9064	0
1	174541230	chr1:174541230:C:T	T	C	-0.476585	3.867e-05	0.6884	0
15	94771642	chr15:94771642:C:A	A	C	-0.208378	3.867e-05	0.5464	0
1	174507331	chr1:174507331:T:A	A	T	-0.476746	3.873e-05	0.6907	0
16	30789862	chr16:30789862:T:A	A	T	-0.197963	3.875e-05	0.81	0
1	174378523	chr1:174378523:T:C	C	T	-0.479165	3.888e-05	0.7011	0
2	12257007	chr2:12257007:G:A	A	G	0.332679	3.889e-05	0.2966	18.55
4	183432639	chr4:183432639:A:G	G	A	-0.199305	3.889e-05	0.7035	0
4	25321048	chr4:25321048:G:C	C	G	-0.186932	3.896e-05	0.9546	0
8	28164252	chr8:28164252:G:T	T	G	0.296097	3.902e-05	0.9766	0
1	174549928	chr1:174549928:G:A	A	G	-0.476263	3.908e-05	0.6938	0
11	47641380	chr11:47641380:T:C	C	T	-0.206655	3.913e-05	0.4313	0
1	174508105	chr1:174508105:C:T	T	C	-0.476424	3.915e-05	0.6897	0
1	174542235	chr1:174542235:G:C	C	G	-0.476102	3.921e-05	0.6829	0
3	17898137	chr3:17898137:A:G	G	A	1.21263	3.929e-05	0.104	62.17
12	103264762	chr12:103264762:T:C	C	T	-0.202851	3.932e-05	0.3171	15.27
11	47887761	chr11:47887761:C:T	T	C	-0.187776	3.935e-05	0.3501	9.85
21	33556949	chr21:33556949:T:G	G	T	0.336901	3.938e-05	0.5864	0
2	123572570	chr2:123572570:C:T	T	C	0.356415	3.94e-05	0.6125	0
16	30920647	chr16:30920647:C:T	T	C	-0.192129	3.946e-05	0.4073	0
16	28941317	chr16:28941317:T:C	C	T	-0.217286	3.949e-05	0.4308	0
3	4192470	chr3:4192470:T:C	C	T	0.193261	3.953e-05	0.3473	10.31
7	88153109	chr7:88153109:G:A	A	G	-0.488086	3.954e-05	0.9249	0
19	2953811	chr19:2953811:G:A	A	G	-0.245645	3.959e-05	0.352	9.52
1	174484723	chr1:174484723:A:G	G	A	-0.476746	3.962e-05	0.6729	0
14	101817340	chr14:101817340:G:T	T	G	-0.282761	3.968e-05	0.1979	33.53
20	63890962	chr20:63890962:A:G	G	A	0.185234	3.97e-05	0.1292	43.9
16	31091000	chr16:31091000:C:T	T	C	0.186811	3.975e-05	0.3035	17.45
13	58345849	chr13:58345849:C:T	T	C	0.358164	3.983e-05	0.1402	45.19
2	198276921	chr2:198276921:C:T	T	C	-0.292896	3.99e-05	0.3018	17.73
18	60087885	chr18:60087885:C:T	T	C	0.201062	3.993e-05	0.255	24.97
1	174378087	chr1:174378087:C:T	T	C	-0.47723	3.999e-05	0.6753	0
16	30822000	chr16:30822000:C:T	T	C	0.187309	4.007e-05	0.6607	0
6	82007544	chr6:82007544:T:A	A	T	0.188055	4.009e-05	0.8565	0
1	174542309	chr1:174542309:G:T	T	G	-0.475458	4.015e-05	0.6899	0
13	58759642	chr13:58759642:C:G	G	C	0.262441	4.015e-05	0.7848	0
4	25372477	chr4:25372477:G:A	A	G	-0.189105	4.022e-05	0.8733	0
14	73241932	chr14:73241932:G:T	T	G	0.360537	4.022e-05	0.5063	0
17	5367119	chr17:5367119:T:C	C	T	0.189794	4.027e-05	0.8412	0
5	144073284	chr5:144073284:G:A	A	G	0.545285	4.028e-05	0.2832	20.74
3	32614670	chr3:32614670:G:A	A	G	1.00129	4.029e-05	0.6596	0
1	174336070	chr1:174336070:T:C	C	T	-0.476102	4.033e-05	0.6896	0
16	30919662	chr16:30919662:C:T	T	C	-0.191887	4.035e-05	0.3558	8.88
1	174497579	chr1:174497579:A:G	G	A	-0.476424	4.038e-05	0.6731	0
1	174557345	chr1:174557345:C:T	T	C	-0.474494	4.038e-05	0.6821	0
14	73153945	chr14:73153945:C:T	T	C	0.359561	4.043e-05	0.5736	0
2	26730672	chr2:26730672:A:G	G	A	0.186894	4.045e-05	0.5437	0
10	49609164	chr10:49609164:G:C	C	G	0.433988	4.049e-05	0.0533	73.23
1	174500225	chr1:174500225:G:A	A	G	-0.475458	4.065e-05	0.6807	0
11	27690834	chr11:27690834:A:G	G	A	0.210342	4.068e-05	0.4729	0
4	126586875	chr4:126586875:C:T	T	C	-0.208748	4.077e-05	0.093	49.76
3	62832498	chr3:62832498:C:T	T	C	0.222824	4.085e-05	0.878	0
16	31033576	chr16:31033576:G:A	A	G	0.187558	4.094e-05	0.2615	23.98
1	174282537	chr1:174282537:A:C	C	A	-0.475619	4.099e-05	0.653	0
4	126581924	chr4:126581924:T:C	C	T	-0.208994	4.109e-05	0.0768	52.6
4	126581324	chr4:126581324:T:G	G	T	-0.208994	4.12e-05	0.078	52.38
1	174532046	chr1:174532046:A:G	G	A	-0.475137	4.123e-05	0.681	0
6	81987161	chr6:81987161:A:G	G	A	0.182655	4.127e-05	0.292	19.26
2	97214328	chr2:97214328:T:C	C	T	-0.835172	4.131e-05	0.509	0
13	58352760	chr13:58352760:A:G	G	A	-0.357961	4.133e-05	0.5298	0
1	174566759	chr1:174566759:C:T	T	C	-0.474976	4.134e-05	0.6827	0
1	72361818	chr1:72361818:G:A	A	G	0.415481	4.139e-05	0.948	0
1	174318432	chr1:174318432:C:A	A	C	-0.475458	4.144e-05	0.6872	0
3	49900794	chr3:49900794:C:G	G	C	0.183571	4.145e-05	0.9385	0
7	76981304	chr7:76981304:T:C	C	T	-0.245645	4.146e-05	0.5651	0
12	90857357	chr12:90857357:T:A	A	T	-0.185246	4.148e-05	0.275	21.91
21	33413020	chr21:33413020:G:A	A	G	0.309028	4.15e-05	0.1954	33.89
6	97975332	chr6:97975332:G:A	A	G	0.180737	4.156e-05	0.4409	0
12	74993523	chr12:74993523:C:T	T	C	-0.292628	4.156e-05	0.0008	82.03
4	126586735	chr4:126586735:G:T	T	G	-0.208501	4.161e-05	0.0931	49.74
4	60581072	chr4:60581072:T:C	C	T	0.314227	4.163e-05	0.6862	0
3	66684623	chr3:66684623:T:C	C	T	0.459195	4.166e-05	0.9305	0
6	98017221	chr6:98017221:G:A	A	G	-0.185125	4.167e-05	0.5812	0
2	26730982	chr2:26730982:C:T	T	C	0.186563	4.173e-05	0.5444	0
[truncated: 15,334 more rows]
